# 1 **Coexistence of Cue-specific and Cue-independent Spatial Representations for** 2 **Landmarks and Self-motion Cues in Human Retrosplenial Cortex**

3

4 Xiaoli Chen<sup>1</sup>, Ziwei Wei<sup>1</sup>, Thomas Wolbers<sup>2,3,4</sup>

5

6 1. Department of Psychology and Behavioral Sciences, Zhejiang University, Hangzhou, China

7 2. German Center for Neurodegenerative Diseases (DZNE), Magdeburg, Germany

8 3. Department of Neurology, Otto-von-Guericke University Magdeburg, Germany

9 4. Center for Behavioral Brain Sciences (CBBS), Otto-von-Guericke University, Magdeburg,  
10 Germany

11

## 12 **Abstract**

13 Landmark-based and self-motion-based navigation are two fundamental forms of spatial  
14 navigation, which involve distinct cognitive mechanisms. A critical question is whether these  
15 two navigation modes invoke common or distinct spatial representations for a given  
16 environment in the brain. While a number of electrophysiological studies in non-human  
17 animals have investigated this question but yielded inconsistent results, it still awaits rigorous  
18 investigation in humans. In the current study, we combined ultra-high field fMRI at 7T and  
19 desktop virtual reality with state-of-the-art fMRI data analysis techniques. Using  
20 a novel linear track navigation task, we dissociated the use of landmarks and self-motion cues,  
21 so that participants used different spatial cues to encode and retrieve the same set of spatial  
22 locations. Focusing on the retrosplenial cortex (RSC) and the hippocampus, we observed that  
23 RSC contained both cue-specific and cue-independent spatial representations, which were  
24 driven by objective location (where the participant was actually located) and subjective  
25 location (the participant's self-reported location), respectively. The hippocampus showed  
26 strong functional coupling with RSC and exhibited a similar spatial coding scheme, but with  
27 reduced effect sizes. Taken together, the current study demonstrated for the first time  
28 concurrent cue-specific and cue-independent spatial representations in RSC in the same  
29 spatial context, suggesting that this area might transform cue-specific spatial inputs into  
30 coherent cue-independent spatial representations to guide navigation behavior.

31

## 32 INTRODUCTION

33 The ability to localize and orient oneself as one navigates an environment is crucial for the  
34 survival of humans and non-human animals. Visual landmarks – salient objects in the  
35 environment – and self-motion cues represent two major and distinct types of cues used in  
36 spatial navigation. Landmark-based navigation is inherently discrete, in that a landmark can  
37 immediately inform about one’s whereabouts. On the contrary, self-motion cues are  
38 generated by one’s own movement and include body-based cues (e.g., vestibular feedback,  
39 proprioceptive cues, and motor efference copies) and optic flow. Navigation with self-motion  
40 cues alone is termed path integration, as one needs to infer self-position through continuous  
41 integration of self-motion inputs during locomotion.

42         Given the considerable body of evidence that landmark-based navigation and path  
43 integration recruit relatively independent cognitive <sup>1,2</sup> and neural processes <sup>3,4</sup>, a critical  
44 question is whether these two navigation modes invoke common or distinct spatial  
45 representations in the brain. On the one hand, because landmarks and self-motion cues  
46 represent different sensory inputs, they may invoke separate neural representations of space.  
47 On the other hand, both cues typically denote the same space, hence spatial knowledge  
48 acquired from different cues should be integrated to generate a coherent representation that  
49 can guide navigation behavior. Deciding between these alternatives is fundamental to  
50 understanding the nature of cognitive maps, because it would provide important insights into  
51 an overarching question in spatial navigation – how different sources of spatial information  
52 are integrated to form a coherent cognitive map in the brain <sup>5-7</sup>.

53         In non-human animals, cue-specific vs. cue-independent neural representations for  
54 the same environment have been examined intensively in the retrosplenial cortex (RSC) and  
55 hippocampus. For example, in bats, Geva-Sagiv and colleagues (2016) found that alternation  
56 between visual information and echolocation caused reorganization of hippocampal place  
57 fields within the same environment (i.e., remapping) <sup>9</sup>, indicating that the hippocampus  
58 created cue-specific spatial maps even in the same environment. Studies in rodents usually  
59 manipulated the availability of visual information by switching a light on and off, but the  
60 results are mixed as to whether this manipulation would induce hippocampal remapping <sup>10-</sup>  
61 <sup>12</sup>. Recently, Radvansky and colleagues (2021) showed that whether a common map or  
62 distinct maps were recruited for visual and odor cues depended on the behavioral relevance

63 of these cues, i.e., whether different cue types were congruent or incongruent in defining a  
64 reward location <sup>13</sup>. In RSC, researchers have also observed neurons exhibiting position-  
65 selective firing <sup>14,15</sup>; these place-cell-like cells maintained the same firing patterns when the  
66 environment was illuminated vs. dark <sup>14</sup>, suggesting cue-independent spatial representations.

67 In humans, the question of cue-independent vs. cue-specific spatial maps has rarely  
68 been investigated. One notable exception is an fMRI study by Huffman & Ekstrom (2019) who  
69 varied the degree of body-based self-motion cues in different virtual reality environments <sup>16</sup>.  
70 This study yielded preliminary evidence for cue-independent spatial representations in a  
71 large-scale brain network, as well as in RSC and the hippocampus. However, it is currently  
72 unknown whether the neural representations for a given environment are independent of or  
73 specific to the cue type used to encode and retrieve spatial locations.

74 To address this critical question, we employed ultra-high resolution fMRI at 7T,  
75 desktop virtual reality, and a mnemonic spatial navigation task to investigate whether cue-  
76 specific vs. cue-independent spatial representations are invoked by landmarks and self-  
77 motion cues. Specifically, we designed a spatial localization task in which participants  
78 encoded and retrieved the same set of four locations on a linear track, using either landmarks  
79 or self-motion cues alone; in other words, the two cue types were fully dissociated in the  
80 same spatial context (Figure 1a&b). We focused on RSC and the hippocampus, which have  
81 been investigated intensively in non-human animal studies on cue-specificity of spatial maps.  
82 We investigated spatial distance coding by exploiting two different types of fMRI effects well-  
83 suited to indexing neural representations of spatial relations – fMRI adaptation (fMRIa) and  
84 multi-voxel pattern similarity (MVPS). fMRIa and MVPS have been proposed to interrogate  
85 different aspects of the neuronal processing <sup>17</sup>. Therefore, by investigating both effects, we  
86 aimed to obtain a more complete understanding of the neural mechanisms underlying spatial  
87 navigation in multi-information environments.

88 To preview, we found the most pronounced effects in RSC, which displayed both cue-  
89 specific and cue-independent spatial coding for landmarks and self-motion cues. Cue-specific  
90 coding was revealed by fMRIa and driven by objective location (i.e., the stimulus input, where  
91 the participant was actually located), whereas cue-independent coding was revealed by MVPS  
92 and driven by subjective location (i.e., the response output, where the participant thought  
93 they were located), indicating that RSC might transform cue-specific spatial inputs into  
94 abstract cue-independent spatial representations. The hippocampus exhibited a spatial

95 coding scheme similar to that of RSC, but with reduced effect sizes. Taken together, the  
96 current study demonstrates for the first time the coexistence of cue-specific and cue-  
97 independent spatial representations in the human RSC.

98

## 99 **RESULTS**

100 Twenty young healthy participants took part in the experiment. There were two different  
101 environments that shared the same object layout (Figure 1a). Participants needed to  
102 memorize the positions of four test locations that were evenly spaced along a linear track in  
103 a desktop virtual reality setup. Four balls of different colors were positioned at the four test  
104 locations. Participants performed a location identification task through the first-person  
105 perspective while undergoing MRI scanning at 7T on two consecutive days (Figure 1b, STAR  
106 Methods). In each trial, the participant was passively moved to a test location, and needed  
107 to identify the test location by recalling the color of the ball positioned at the location. The  
108 ball remained invisible throughout the trial. The arrows and the tree were positioned at the  
109 two ends of the ball object layout in the linear track, with the arrows closer to the starting  
110 position of the passive movement. We dissociated the use of landmark cues (a tree) and self-  
111 motion cues (optic flow elicited by the ground texture) in the task, so that on a given trial  
112 subjects could use only one cue type to encode and retrieve the test locations in the same  
113 environment. In the landmark condition, the tree served as the anchoring point, because it  
114 was the only spatial cue available and was informative of the participant's self-position. In the  
115 self-motion condition, the position of the arrows served as the anchoring point, because once  
116 the participant had moved past the arrows, there were no further landmarks in sight, forcing  
117 the participant to estimate the travelled distance relative to the arrows by continuously  
118 integrating optic flow inputs.

119

### 120 **Behavioral evidence for a dissociation of landmarks and self-motion cues**

121 Behavioral results are summarized in Figure 2. We submitted behavioral accuracy score to a  
122 repeated-measures ANOVA, with cue type, test location, scanning day, and environment as  
123 independent variables. This analysis revealed main effects of cue type ( $F(1,19) = 10.552$ ,  $p =$   
124  $0.004$ ,  $\eta_p^2 = 0.357$ ) and location ( $F(3,57) = 9.170$ ,  $p < 0.001$ ,  $\eta_p^2 = 0.326$ ), which were qualified  
125 by a significant interaction between the two factors ( $F(3,57) = 25.051$ ,  $p < 0.001$ ,  $\eta_p^2 = 0.569$ )

126 (Figure 2a): in the landmark condition, behavioral accuracy increased as the test location got  
127 closer to the tree (i.e., the anchoring point for landmark-based navigation), whereas in the  
128 self-motion condition, behavioral accuracy increased as the test location got closer to the  
129 arrows (i.e., the anchoring point for path integration). Accordingly, the interaction between  
130 cue type and the linear trend of test location was significant ( $t(57) = 8.487$ ,  $p < 0.001$ ). A closer  
131 look revealed that the linear trend of test location was significant in both the landmark  
132 condition ( $t(112) = 3.020$ ,  $p = 0.003$ ) and the self-motion condition ( $t(112) = 9.798$ ,  $p < 0.001$ ).  
133 No effects involving scanning day or environment were significant ( $ps > 0.3$ ).

134 Since behavioral accuracy is jointly determined by representational precision and  
135 response bias, we tested whether using different navigational cues affected the underlying  
136 cognitive representations of the test locations. First, we aggregated data across participants  
137 and computed a group-level behavioral confusion matrix to characterize how participants  
138 confused the test locations (e.g., choosing location 1 as the response while actually occupying  
139 location 2). As can be seen in Figure 2b, mistakes mostly occurred between adjacent locations  
140 (e.g., Loc1 & Loc2), but rarely between locations that were farther apart (e.g., Loc1 & Loc4).  
141 Next, the group-level behavioral confusion matrices were submitted to an extension of signal  
142 detection theory, which we developed to accommodate tasks with more than two choices  
143 (Figure 2c; STAR Methods). The results showed that this model fitted the data very well ( $R_s >$   
144  $0.94$ ; Figure 2c.4). Furthermore, as shown in Figure 2c.1 and Figure 2c.2, in both cue  
145 conditions, the standard deviation of the underlying representation for the test location (i.e.,  
146 the inverse of precision) decreased as the test location became closer to the respective  
147 anchoring points (i.e., the tree in the landmark condition and the arrows in the self-motion  
148 condition), which corresponds to the behavioral accuracy results (Figure 2a).

149 In summary, the primary behavioral finding was the differential performance profiles  
150 across test locations in the two cue conditions. Importantly, this finding was not confounded  
151 by possible response biases, because the underlying representational precision was  
152 influenced by test location and cue type in the same manner. Taken together, the behavioral  
153 results indicated that our cue dissociation manipulation was successful.

154

## 155 **fMRI results**

156 fMRI analyses focused on the location occupation phase of the location identification  
157 task, when the camera was panned down to the ground to render visual inputs identical

158 between the landmark condition and self-motion condition (Figure 1b). We examined  
159 whether BOLD signals in RSC contained information about allocentric distance-based spatial  
160 relations among the test locations. To this end, by adopting a continuous carry-over design  
161 <sup>18,19</sup>, we simultaneously investigated fMRI adaptation (fMRIa) and multi-voxel pattern  
162 similarity (MVPS), both of which have been used to evaluate neural representations of  
163 allocentric spatial relations between locations <sup>20</sup>. fMRIa refers to the phenomenon that the  
164 BOLD signal is reduced if the current location is preceded by the same or a nearby location,  
165 and the degree of repetition suppression is proportional to the spatial proximity of the two  
166 locations <sup>3,21,22</sup>. MVPS exploits the voxel-to-voxel distribution of brain activation that indexes  
167 neural representation, based on the rationale that spatial locations that are closer to each  
168 other should evoke more similar neural representations <sup>23,24</sup>. One hypothesis postulates that  
169 fMRIa and MVPS respectively interrogate the neuronal input stage, which is associated with  
170 stimulus input, and the neuronal output stage, which is associated with response output <sup>17</sup>.  
171 This hypothesis has received empirical support (see discussion for details). Motivated by this  
172 hypothesis, we analyzed fMRIa and MVPS in terms of both stimulus input (e.g., objective  
173 location, where the participant was actually located) and response output (i.e., subjective  
174 location, where the participant reported he/she was located), and then corrected for multiple  
175 comparisons. fMRI analyses focused on the RSC and the hippocampus. For completeness,  
176 results for other areas in the medial temporal lobe (i.e., parahippocampal cortex, perirhinal  
177 cortex, and entorhinal subregions) are summarized in the supplemental information (Table  
178 S3).

179

180 **RSC showed fMRIa-based spatial distance coding for both landmarks and self-motion cues,**  
181 **which was driven by objective location**

182 To examine whether RSC encoded spatial distance information in the form of fMRIa, we  
183 conducted univariate fMRIa analyses, in which we included parametric regressors that  
184 modeled modulatory effects of spatial distances between successively visited test locations  
185 in the first-level general linear models (STAR Methods, fMRIa-GLM1). The parametric  
186 regressors were defined either by objective or subjective locations. In the self-motion  
187 condition, the parametric regressors modeled spatial distances between successively visited  
188 test locations in a continuous manner by default, with four possible values of 0m, 4m, 8m,  
189 and 12m. Given a previous study showing that in retrosplenial regions fMRIa associated with

190 landmark-defined locations only differentiated between same vs. different locations (but not  
191 between different spatial distances between different locations)<sup>22</sup>, the parametric regressors  
192 in our landmark condition reflected whether the currently visited location was identical to  
193 (value = 0) or different from (value = 1) the preceding one. For each parametric regressor,  
194 beta estimates were averaged across all voxels in RSC.

195 We analyzed fMRIa averaged across the two environments and the two scanning days.  
196 We tested objective-location-based and subjective-location-based fMRIa for the two cue  
197 conditions against 0 using one-tailed simple t tests, with the familywise type I error controlled  
198 at 0.05 using the permutation-based Holm-Bonferroni method for the four individual t tests  
199 (STAR Methods). As shown in Figure 3a and Table 1, RSC showed significant objective-  
200 location-based fMRIa for landmarks ( $p_{\text{corrected}} = 0.005$ ) and self-motion cues ( $p_{\text{corrected}} = 0.012$ ).  
201 The subjective-location-based fMRIa was significant in the landmark condition ( $p_{\text{corrected}} =$   
202  $0.010$ ) but not in the self-motion condition ( $p_{\text{corrected}} = 0.061$ ). Additional analyses showed that  
203 in the landmark condition, fMRIa was stronger on the 2<sup>nd</sup> than the 1<sup>st</sup> scanning day ( $p = 0.012$ ):  
204 fMRIa was highly significantly on the 2<sup>nd</sup> day (objective location,  $p_{1\text{-tailed,uncorrected}} = 0.0004$ ,  
205  $BF_{10} = 80.494$ ; subjective location,  $p_{1\text{-tailed,uncorrected}} = 0.002$ ,  $BF_{10} = 18.596$ ), but not significant  
206 on the 1<sup>st</sup> day ( $p_{S1\text{-tailed,uncorrected}} > 0.45$ ,  $BF_{S10} < 0.25$ ). No significant influences of environment  
207 were observed (Table S1). Overall, these results suggest that fMRIa was associated more  
208 strongly with objective location than subjective location.

209 To rigorously disentangle the contributions of objective vs. subjective location, we  
210 directly compared them by including parametric regressors for objective-location-defined  
211 and for subjective-location-defined spatial relations in the same first-level general linear  
212 model (STAR Methods, fMRIa-GLM2). As shown in Figure 3b and Table 1, the unique  
213 contribution of objective location was significant in both the landmark ( $p_{1\text{-tailed}} = 0.025$ ) and  
214 the self-motion condition ( $p_{1\text{-tailed}} = 0.039$ ). In contrast, the unique contribution of subjective  
215 location was not significant in either the landmark condition ( $p_{1\text{-tailed}} = 0.454$ ) or the self-  
216 motion condition ( $p_{1\text{-tailed}} = 0.636$ ). Given that high behavioral accuracy levels could cause  
217 unreliable beta estimates of the parametric regressors due to high correlations between  
218 objective-location-defined and subjective-location-defined spatial relations, we excluded  
219 participants with behavioral accuracy > 90% from the analysis; the pattern of results remained  
220 unchanged.

221 Additional analyses showed that these results could not be explained by potential  
222 differences in the relative detection power ( $DP_{rel}$ ) between the objective-location-defined  
223 and subjective-location-defined parametric regressors (STAR Methods). Although the  
224 objective-location sequences had significantly higher  $DP_{rel}$  for fMRIa than subjective-location  
225 sequences ( $p < 0.001$ ), the magnitude of the difference was negligible ( $DP_{rel} = 64\%$  vs.  $63\%$ ).

226 Together, these results indicate that fMRIa was predominantly driven by objective  
227 rather than subjective location.

228 To visualize objective-location-based fMRIa (Figure 3c; STAR Methods, fMRIa-GLM3),  
229 in the self-motion condition, RSC activation increased in a linear manner as inter-location  
230 distance increased from 0m to 12m; in the landmark condition, RSC activation was higher at  
231 the non-zero inter-location distances relative to the zero inter-location distance (i.e., when  
232 two successively visited locations were the same), but remained at similar levels for different  
233 non-zero distances.

234 Finally, we conducted the voxel-wise analysis to investigate fMRIa in the entire-  
235 volume (Figure S1). In posterior cingulate areas (including RSC proper and the putative  
236 retrosplenial complex), fMRIa appeared to be stronger when based on objective location than  
237 subjective location in both cue conditions. This trend also existed in other brain regions, e.g.,  
238 precuneus, calcarine, and angular gyrus.

239 To summarize, the results showed that RSC encoded spatial information for both cue  
240 types in the form of repetition suppression, which was mainly driven by objective rather than  
241 subjective location. For landmarks, the spatial coding mainly differentiated between same vs.  
242 different locations, whereas for self-motion cues the spatial coding differentiated different  
243 inter-location distances in a continuous manner.

244

#### 245 **fMRIa-based distance coding was spatially distinct between cue types in RSC**

246 To uncover whether or not the underlying fMRIa-based neural representations were  
247 distinct between the two cue types, we analyzed the similarity of the fMRIa patterns (Figure  
248 4a; STAR Methods, fMRIa-GLM1), i.e., we determined whether voxels showing higher fMRIa  
249 for one cue also showed higher fMRIa for the other cue. Specifically, we derived a fMRIa  
250 pattern distinction score, which was quantified as within-cue similarity (cross-validated  
251 Pearson correlation <sup>25</sup> between fMRIa vectors of the same cue type) minus between-cue  
252 similarity (Pearson correlation between fMRIa vectors of different cue types). A pattern



253 distinction score significantly greater than 0 would indicate that the across-voxel fMRIa  
254 pattern was distinct between the two cue types. The analysis was based on objective location,  
255 given the previous finding that fMRIa was mainly driven by objective location instead of  
256 subjective location.

257 As shown in Figure 4b, because the within-day pattern distinction score was  
258 significantly greater than the between-day distinction score ( $t(19) = 2.825$ ,  $p_{2\text{-tailed}} = 0.011$ ,  
259  $BF_{10} = 4.799$ ), we analyzed them separately. The within-day pattern distinction score was  
260 significantly greater than 0 ( $t(19) = 2.885$ ,  $p_{1\text{-tailed}} = 0.005$ ,  $BF_{10} = 10.625$ ), because the within-  
261 cue similarity was significantly positive ( $t(19) = 2.708$ ,  $p_{1\text{-tailed}} = 0.007$ ,  $BF_{10} = 7.694$ ) while the  
262 between-cue similarity was not ( $t(19) = -0.807$ ,  $p_{1\text{-tailed}} = 0.785$ ,  $BF_{10} = 0.141$ ). These results  
263 mean that while the fMRIa pattern remained stable for a given cue type, it differed between  
264 the two cue types.

265 In contrast, the between-day pattern distinction score was not significantly greater  
266 than 0 ( $t(19) = -1.145$ ,  $p_{1\text{-tailed}} = 0.867$ ,  $BF_{10} = 0.120$ ), because neither the within-cue similarity  
267 nor the between-cue similarity was significantly greater than 0 (within-cue,  $t(19) = -0.292$ ,  $p_{1\text{-}}$   
268  $tailed = 0.613$ ,  $BF_{10} = 0.189$ ; between-cue,  $t(19) = 1.717$ ,  $p_{1\text{-tailed}} = 0.051$ ,  $BF_{10} = 1.513$ ). Note that  
269 the within-cue similarity was also significantly greater for within-day than between-day ( $t(19)$   
270  $= 2.368$ ,  $p_{2\text{-tailed}} = 0.029$ ,  $BF_{10} = 2.162$ ).

271 Further analyses showed that the same pattern of results existed in each environment,  
272 meaning that the above-mentioned results were not solely driven by a single environment  
273 (Figure S2a). More control analyses revealed the same pattern of results, when we analyzed  
274 the subjective-location-based fMRIa and when the inter-location distance was modeled  
275 continuously in both cue conditions (Figure S2b).

276 To summarize, the fMRIa patterns were correlated within the same cue type but  
277 uncorrelated between different cue types. This effect occurred within the same scanning day,  
278 and was driven by the temporally stable within-cue fMRIa patterns. Taken together, these  
279 results suggest that although RSC encoded spatial distances for both landmarks and self-  
280 motion cues in the form of fMRIa, the underlying spatial representations were distinct  
281 between the two cue types.

282

283 **RSC showed MVPS-based spatial distance coding for both cue types, which was cue-**  
284 **independent and mainly driven by subjective location**

285 Previous results have shown that RSC activation showed adaptation as a function of spatial  
286 distance. Here, we investigated whether RSC also contained a similar spatial coding in the  
287 form of multi-voxel pattern similarity (MVPS) (Figure 5a). The rationale is that locations closer  
288 to each other in space should evoke more similar neural representations as indexed by the  
289 multi-voxel activation pattern. First, we calculated MVPS between two test locations as  
290 correlational similarity between their corresponding across-voxel activation patterns. Next, a  
291 spatial information score was obtained by correlating activation pattern similarity with inter-  
292 location distance. A spatial information score greater than 0 would indicate that distances  
293 between test locations were encoded in the brain activity. We calculated spatial information  
294 scores both within and between the two cue types. The within-cue spatial information scores  
295 informed whether distances were encoded for a given cue type. The between-cue spatial  
296 information score informed whether the spatial coding was generalizable between cue types,  
297 which would be indicative of common spatial representations for both cue types. For all the  
298 three measurements, we modeled spatial distances among test locations in a continuous  
299 manner by default (STAR Methods, MVPS-GLM1).

300 We calculated spatial information scores based on objective and subjective locations  
301 and tested them against 0 using one-tailed simple t tests, with the familywise type I error  
302 controlled at 0.05 using the permutation-based Holm-Bonferroni procedure for the six  
303 individual t tests (measurement (landmark vs. self-motion vs. between-cue)  $\times$  location type  
304 (objective vs. subjective) (STAR Methods). As shown in Figure 5b and Table 1, when objective  
305 locations were modeled, spatial information scores were significant in the landmark condition  
306 ( $p_{\text{corrected}} = 0.010$ ) but neither in the self-motion condition ( $p_{\text{corrected}} = 0.067$ ) nor between cue  
307 types ( $p_{\text{corrected}} = 0.159$ ). When subjective locations were modeled, spatial information scores  
308 were significant in both the landmark ( $p_{\text{corrected}} = 0.002$ ) and the self-motion condition  
309 ( $p_{\text{corrected}} = 0.046$ ). Critically, the between-cue spatial information score was also significant  
310 ( $p_{\text{corrected}} = 0.010$ ). Additional analyses showed that day (Figure 5b) and environment (Table  
311 S1) did not affect subjective-location-based MVPS, which was also generalizable between  
312 days (Figure 5b) and environments for all three measurements (Table S1). These results  
313 suggest that overall MVPS was associated more strongly with subjective than objective  
314 location.

315 To rigorously disentangle objective and subjective location, we directly compared  
316 objective-location-defined and subjective-location-defined spatial distances when computing

317 the spatial information scores (STAR Methods, MVPS-GLM2). As shown in Figure 5c and Table  
318 1, the unique contribution of objective location was not significant for all the three  
319 measurements ( $p_{s1\text{-tailed}} > 0.09$ ). The unique contribution of subjective location was significant  
320 for self-motion cues ( $p_{1\text{-tailed}} = 0.006$ ) and between cue types ( $p_{1\text{-tailed}} = 0.019$ ), but not for the  
321 landmarks ( $p_{1\text{-tailed}} = 0.254$ ). When excluding participants with high behavioral accuracies (>  
322 90%) that could cause unreliable estimates, the unique contribution of subjective location  
323 was significant for all three measurements ( $p_{s1\text{-tailed}} < 0.03$ ), while the unique contribution of  
324 objective location remained non-significant ( $p_{s1\text{-tailed}} > 0.15$ ). These results showed that MVPS  
325 was predominantly driven by subjective rather than objective location. These subjective-  
326 location-based MVPS effects are visualized in Figure 5d, which shows that activation pattern  
327 similarity decreased in a linear manner as inter-location distance increased for landmarks,  
328 self-motion cues, and between cue types.

329 Finally, we conducted the searchlight analysis to investigate MVPS in the entire-  
330 volume (Figure S3 & Table S2). In posterior cingulate areas (including RSC proper and the  
331 putative retrosplenial complex), MVPS was generally stronger when based on subjective than  
332 subjective location in all the three measurements. This is most obvious for self-motion cues  
333 and between cue types. This trend also existed in other brain regions, e.g., precuneus, middle  
334 occipital gyrus, middle temporal gyrus, and angular gyrus.

335 To summarize, we found that i) RSC encoded spatial distances for both cue types in  
336 the form of MVPS, ii) the coding was mainly driven by subjective rather than objective location,  
337 and iii) the coding was generalizable between the cues. Together, these results suggest cue-  
338 independent spatial representations in RSC, which also seemed to be cue-invariant, because  
339 the spatial information score did not differ among landmarks, self-motion cues, and between  
340 cue types ( $p_s > 0.4$ ,  $BF_{s10} < 0.33$ ).

341

### 342 **Neural space reconstructed from MVPS in RSC resembled navigation behavior**

343 The preceding analyses showed that RSC contained fMRIa-based cue-specific and MVPS-  
344 based cue-independent spatial representations. However, a major limitation of both analyses  
345 is that different location pairs with the same inter-location distance value were treated  
346 equally, which could have obscured potential subtle aspects of the underlying neural  
347 representations as suggested by participant's behavioral performance pattern (Figure 2).  
348 Therefore, to better characterize the spatial codes in RSC and their relations to participants'

349 behavior, we applied a neural space reconstruction analysis and recovered the entire neural  
350 space with positional estimates for all the four test locations. The neural space was  
351 reconstructed based on neural distances between the four test locations defined by objective  
352 location, which was then compared to participants' behavior and the original physical space  
353 (Figure 6a; STAR Methods). Resemblance with the behavioral pattern would indicate that  
354 imperfections of the neural representations in RSC for the external physical space might have  
355 mediated the behavioral mistakes participants made, whereas resemblance with the original  
356 physical space would indicate that the physical space was represented faithfully in RSC.

357 For fMRIa, we first submitted the participant-specific reconstructed neural distances  
358 between adjacent locations to a repeated-measures ANOVA, with cue type (landmark vs. self-  
359 motion) and adjacent location pair (Loc1-2 vs. Loc2-3 vs. Loc3-4) as independent variables  
360 (Figure 6b.1). Unlike the behavioral pattern, the interaction effect between the linear trend  
361 of location pair and cue type was not significant ( $F(1,19) = 0.239$ ,  $p_{1\text{-tailed}} = 0.630$ ,  $\eta_p^2 = 0.012$ ).  
362 Next, to assess the similarity with the original physical space, we conducted a permutation-  
363 based test on the group-level neural distance matrix (Figure 6b.2). In the landmark condition,  
364 the neural space did not significantly resemble the original space ( $p = 0.741$ ), with some  
365 locations even swapped in order (e.g., Loc3 was to the left of Loc1). This echoes with the  
366 earlier observation that in the landmark condition, the repetition suppression effect seemed  
367 to only discriminate between same and different locations, but not between different non-  
368 zero inter-location distances (Figure 3c). On the contrary, in the self-motion condition, the  
369 neural space significantly resembled the original physical space ( $p_{1\text{-tailed}} = 0.018$ ). This also  
370 echoes with the earlier observation that in the self-motion condition, the repetition  
371 suppression effect appeared to occur in a linear manner over the entire range of inter-  
372 location distance (Figure 3c). In brief, fMRIa-based neural space (i) bore no similarities to  
373 behavior in the two cue conditions and (ii) significantly resembled the original physical space  
374 in the self-motion condition.

375 For MVPS, first, we analyzed participant-specific neural distances, and observed  
376 significant interaction between cue type and the linear trend of location pair ( $F(1,19) = 12.016$ ,  
377  $p = 0.003$ ,  $\eta_p^2 = 0.387$ ): the neural distance between adjacent locations decreased as the  
378 locations became farther away from the landmark in the landmark condition, whereas the  
379 pattern was reversed in the self-motion condition (Figure 6c.1). This is parallel to the

380 behavioral performance pattern (Figure 2). Next, we analyzed the group-level neural distance  
381 matrix, and found that the recovered neural space did not significantly resemble the original  
382 physical space in either cue condition (landmark,  $p_{1\text{-tailed}} = 0.100$ ; self-motion,  $p_{1\text{-tailed}} = 0.173$ ;  
383 Figure 6c.2); furthermore, the group-level neural space (Figure 6c.2) exhibited a structure  
384 qualitatively similar to the behavioral performance pattern (Figure 2).

385 To summarize, the fMRIa-based neural spaces did not resemble participants' behavior.  
386 Furthermore, in the self-motion condition, the fMRIa-based neural space resembled the  
387 original physical space, suggesting a map-like spatial code that maintained Euclidean  
388 distances among test locations without salient spatial distortions. In contrast, the MVPS-  
389 based neural spaces exhibited a pattern similar to participants' behavior and did not resemble  
390 the original physical space. Taken together, compared to fMRIa, MVPS was more closely  
391 associated with behavior along the stimulus-response spectrum, which is consistent with the  
392 preceding observation that MVPS was fitted better by subjective-location-defined than  
393 objective-location-defined spatial distances.

394

### 395 **Hippocampus contained a spatial coding scheme similar to RSC**

396 We found that the hippocampus, whose trial-by-trial activation was strongly correlated with  
397 RSC (Figure S4), also showed a spatial coding scheme similar to that of RSC. In particular, the  
398 hippocampus exhibited a trend towards fMRIa-based cue-specific spatial representations  
399 (Figure S5), and MVPS-based cue-independent spatial representations that resembled  
400 participants' behavior (Figure S6). However, compared to RSC, these effects in the  
401 hippocampus were evidently reduced in magnitudes, and objective location and subjective  
402 location were less well dissociated in the neural coding (e.g., Figure S6b&e).

403

## 404 **DISCUSSION**

405 The current study investigated whether landmark-based navigation and path integration  
406 recruit cue-specific or cue-independent spatial representations in the human RSC and  
407 hippocampus. Participants completed a spatial navigation task on a linear track, in which the  
408 use of landmarks and self-motion cues was dissociated, but they used these cues to encode  
409 and retrieve the same set of spatial locations. In RSC, we found clear evidence for the  
410 existence of both cue-specific and cue-independent spatial representations. Cue-specific  
411 spatial representations were revealed through fMRIa: while RSC displayed repetition

412 suppression for both landmarks and self-motion cues, the distributed fMRIa patterns were  
413 distinct between cue types. Cue-independent spatial representations were revealed through  
414 MVPS, in that the similarity of multi-voxel activation patterns between two locations –  
415 defined by the same or different cue types – decreased as the inter-location distance  
416 increased. Additionally, while fMRIa-based spatial representations were more related to  
417 objective sensory inputs, MVPS-based spatial representations were more strongly associated  
418 with behavior that differed from the sensory inputs. The hippocampus exhibited strong  
419 functional connectivity with RSC and showed a similar spatial coding scheme, but the effects  
420 were generally weaker. To our knowledge, the current study is the first demonstration in  
421 humans that both types of spatial representations co-existed in the same brain region while  
422 participants were performing a navigation task in the same spatial context.

423 One prominent feature of the current study is that landmarks and self-motion cues  
424 were clearly dissociated, which is evident in the differential behavioral profiles of the two cue  
425 conditions. Specifically, behavioral performance increased as the test location got closer to  
426 the landmark in the landmark condition, whereas the opposite pattern was observed in the  
427 self-motion condition. This is because while the spatial precision afforded by the landmark  
428 (i.e., the anchoring point of landmark-based navigation) deteriorates as the location becomes  
429 farther away from it<sup>3,26</sup>, path integration gets noisier as the navigator travelled along the path  
430 and away from its anchoring point – the fixed starting position<sup>27</sup>. This finding is broadly  
431 consistent with previous studies showing a relative independence of path integration and  
432 landmark-based navigation in behavior<sup>1,2</sup>, which suggests that our cue dissociation  
433 manipulation successfully elicited distinct navigational strategies in the two different cue  
434 conditions. On the contrary, spatial cues were not clearly dissociated in most of the previous  
435 related studies<sup>10–12,14,16</sup>. For example, in Huffman and Ekstrom’s human fMRI study<sup>16</sup>, visual  
436 information was present in all conditions that differed in the degree of body-based self-  
437 motion cues, raising the possibility that the reported cue-independent neural representations  
438 may have been driven by the ever-present visual information.

439 The simultaneous investigation of fMRIa and MVPS was the key factor to reveal both  
440 cue-specific and cue-independent spatial representations in RSC (and potentially in the  
441 hippocampus as well). When the sensory inputs for encoding the same physical space  
442 changed, previous studies have observed either cue-specific spatial representations in the  
443 hippocampus<sup>9</sup>, or cue-independent spatial representations in RSC<sup>14</sup> and in the brain-wide

444 functional connectivity pattern<sup>16</sup>. A recent study found that whether altering spatial inputs  
445 invoked cue-specific or cue-independent spatial representations in the hippocampus  
446 depended on whether different cue types were congruent in defining the reward location<sup>13</sup>.  
447 Taken together, previous studies have observed either cue-specific or cue-independent  
448 spatial representations but not both at the same time in the same spatial context. Note that  
449 in the current study, participants always performed the same navigation task by encoding and  
450 retrieving the same spatial locations in the same environment with the same reward  
451 configuration; the sole difference between different cue conditions was the type of spatial  
452 information available. Therefore, our observation of concurrent cue-specific and cue-  
453 independent spatial representations could not have been confounded by factors like task  
454 requirement or reward setup. Moreover, our findings suggest that previous studies reporting  
455 cue-independent spatial representations might have missed parallel cue-specific  
456 representations reflected in a different form of neural activity<sup>13,14,16</sup>. For this reason, the  
457 current study highlights the importance of investigating complementary neural phenomena  
458 to obtain a more complete understanding of the neural representations underlying cognitive  
459 maps.

460 Cue-specific and cue-independent representations were revealed by fMRIa and MVPS,  
461 respectively. These two approaches can yield inconsistent results<sup>17,28-32</sup>, which may indicate  
462 that they interrogate different aspects of neural operations. One hypothesis posits that fMRIa  
463 is related to the processing of neuronal inputs, whereas MVPS reflects neuronal output<sup>17</sup>.  
464 Consistent with this hypothesis, neuronal adaptation (i.e., reduction in neural responses to  
465 the same or a similar stimulus) in the macaque inferior temporal cortex was smaller between  
466 two different stimuli – compared to two identical stimuli –, even though both stimuli  
467 activated the neuron to the same extent<sup>33-35</sup>. This stimulus dependency indicates that  
468 neuronal adaptation may occur locally at the level of the synapses onto the neuron<sup>35</sup>.  
469 Consistently, fMRIa seems to be relatively independent of top-down cognitive operations  
470 such as task requirement<sup>36</sup> and attentional state<sup>33</sup> that typically affect behavior. In contrast,  
471 previous human neuroimaging studies frequently observed tight relationships between MVPS  
472 and overt behavior<sup>29</sup>, e.g., more distinct MVPS-based neural representations of different  
473 items correspond to better discrimination performance<sup>37-40</sup>. Consistently, the collective  
474 activity of the place cell population in the rodent hippocampus encodes the animal's  
475 subjective recognition of the reward location, regardless of whether it matched the true

476 reward location or not <sup>41</sup>. This indicates that the collective neuronal output of hippocampal  
477 place cells is rather linked to response output instead of stimulus input.

478 Our results also provide support for the input-versus-output hypothesis, in that fMRIa  
479 and MVPS effects in RSC were associated with objective and subjective locations, respectively.  
480 What does this reveal about the underlying neural mechanisms in RSC? First, fMRIa patterns  
481 based on objective locations were spatially dissociated between landmarks and self-motion  
482 cues, which would be consistent with separate location-sensitive neuronal subpopulations  
483 that were driven by sensory inputs from the two cue types, respectively. These  
484 subpopulations should display adaptation to the stimulation from external spatial inputs.  
485 Second, MVPS based on subjective locations was spatially generalizable between cue types,  
486 which would be consistent with a location-sensitive neuronal subpopulation whose ensemble  
487 activity represented the navigator's subjective location in a cue-independent manner.  
488 Importantly, this particular subpopulation should not display adaptation, because the fMRIa  
489 patterns would otherwise have shown spatial overlap between the cue types and hence  
490 eliminated the cue-specificity we observed in the distributed fMRIa patterns. Finally,  
491 additional analyses showed that MVPS and fMRIa were relatively independent at the voxel  
492 level (Figure S7), indicating that the non-adapting subpopulation representing subjective  
493 locations was probably anatomically separable from the adapting subpopulations encoding  
494 objective locations.

495 This interpretation is corroborated by recent observations in rodents. Brennan et al.  
496 (2019) discovered different types of cells in the rodent RSC, with one cell type adapting to  
497 external stimulation and the other type showing no adaptation but firing persistently in the  
498 presence of continued stimulation <sup>42</sup>. Importantly, their modeling work suggests that it is the  
499 activity of the non-adapting cells – but not the adapting cells – that represents the animal's  
500 current head direction when the animal remains still, a scenario similar to the navigation task  
501 used in the current study (i.e., we analyzed fMRI data acquired from when the participants'  
502 first-person perspective was fixed at the test locations for 4 seconds). Furthermore, Fischer  
503 et al. (2019) found in rodents that V1 projections to RSC displayed similar spatial tuning as  
504 the place-cell-like cells in RSC, but with less modulation of the animal's navigation state (i.e.,  
505 active vs. passive navigation) <sup>43</sup>. This echoes with our observation that cue-specific fMRIa  
506 effects were tied closely to objective locations and less so to overt navigation behaviors.



507 Taken together, findings of these rodent studies accord with our interpretation that different  
508 neuronal subpopulations may serve different computational purposes in RSC.

509 The functional properties of RSC put it in a good position to support participants'  
510 navigation behavior in the current study. The completion of the location identification task  
511 recruited two main cognitive components: a long-term memory component, which  
512 corresponds to the cue-independent memory traces of the four test locations learned over  
513 time, and a perception component, which corresponds to perceiving instantaneous cue-  
514 specific sensory inputs. Participants had to compare the two components to judge which of  
515 the four stored memory traces best matched the current sensory inputs. RSC subserves long-  
516 term spatial memories<sup>44–46</sup> and receives projections from brain regions that process a variety  
517 of sensory information, including several visual areas (incl. V1, V3 and V4<sup>47</sup>), thalamus<sup>48</sup>, and  
518 areas in the medial temporal lobe<sup>49</sup>. Therefore, RSC appears to mediate the interaction  
519 between long-term memory (likely reflected in MVPS) and perception (likely reflected in  
520 fMRIa) to facilitate cognitive map formation<sup>5–7</sup>, e.g., by integrating different spatial inputs  
521 with preexisting memory traces to construct coherent spatial representations. This might  
522 explain why RSC's neuronal output was closely related to the response output (i.e.,  
523 participants' behavior), and why RSC's spatial coding scheme corresponded to the input-  
524 versus-output hypothesis in the current study.

525 Finally, we found that RSC and the hippocampus showed strong functional  
526 connectivity along with similar spatial coding schemes, which accords with recent findings in  
527 rodents<sup>14,15,50,51</sup>. Note that like RSC, the hippocampus is also well-suited to mediate the  
528 interaction between long-term memory and perception, because it is crucial for memory  
529 formation<sup>52,53</sup> and also receives multisensory inputs via the entorhinal cortex<sup>54</sup>. However,  
530 although BOLD signal quality in terms of the temporal signal-to-noise ratio was comparable  
531 between the two regions (Table S4), effects were generally weaker in the hippocampus. This  
532 difference could be related to the memory stage our participants were at during the scanning.  
533 Past work has indicated that hippocampal and RSC activity reflects the learning rate and the  
534 learning amount, respectively, so that the hippocampal involvement decreases whereas RSC  
535 involvement increases as spatial memories are being formed<sup>44,55</sup>. In addition, spatial  
536 representations appeared to shift from the hippocampus to RSC during the course of memory  
537 formation<sup>45</sup>. Our results showed that compared to the behavioral training day prior to the  
538 MRI scanning, participants' performance improved on the first scanning day but remained

539 unchanged between the two scanning days (Figure 2 & Table S5), indicating that participants  
540 might have already reached late stages of memory formation during scanning. Consistently,  
541 additional fMRI analyses revealed that RSC, but not the hippocampus, was more activated  
542 during successful than failed trials (Table S6). This might also explain why we barely observed  
543 fMRIa in the entorhinal cortex, except that in the posterior-medial entorhinal cortex the  
544 fMRIa-based neural space resembled the original physical space (Table S3). This finding is  
545 inconsistent with our previous report of fMRIa-based distance coding in the entorhinal cortex  
546 for both landmarks and self-motion cues <sup>3</sup>. Considering that the hippocampus receives  
547 sensory information from cortical areas via the entorhinal cortex <sup>54</sup>, it is conceivable that the  
548 entorhinal cortex should be minimally recruited if the downstream area hippocampus was  
549 not much involved in the task. Consistent with the interpretation, we found that along with  
550 the hippocampus, the entorhinal subregions contributed to successful navigation in our  
551 previous study but not in the current study (Table S6). Therefore, future work is needed to  
552 investigate the temporal dynamics between the hippocampal formation and RSC in  
553 representing spatial information at different memory stages.

554

## 555 **CONCLUSION**

556 In this study, we investigated a core question in spatial navigation—whether landmark-  
557 based navigation and path integration recruit common or distinct spatial representations in  
558 the brain. We demonstrated the coexistence of cue-specific and cue-independent spatial  
559 representations in the human RSC. Furthermore, by establishing a human fMRI paradigm  
560 highly similar to paradigms widely used in non-human animal studies, we hope the current  
561 study will facilitate inter-species comparisons in spatial navigation.

## 562 References

- 563 1. Chen, X., McNamara, T. P., Kelly, J. W. & Wolbers, T. (2017). Cue combination in human  
564 spatial navigation. *Cognit. Psychol.* *95*, 105–144.
- 565 2. Etienne, A. S., Maurer, R. & Seguinot, V. (1996). Path integration in mammals and its  
566 interaction with visual landmarks. *J. Exp. Biol.* *199*, 201–209.
- 567 3. Chen, X., Vieweg, P. & Wolbers, T. (2019). Computing distance information from  
568 landmarks and self-motion cues - Differential contributions of anterior-lateral vs.  
569 posterior-medial entorhinal cortex in humans. *NeuroImage* *202*, 116074.
- 570 4. Knierim, J. J., Neunuebel, J. P. & Deshmukh, S. S. (2014). Functional correlates of the  
571 lateral and medial entorhinal cortex: Objects, path integration and local–global reference  
572 frames. *Philos. Trans. R. Soc. B* *369*, 20130369.
- 573 5. O’Keefe, J. & Nadel, L. (1978). *The hippocampus as a cognitive map*. (Oxford university  
574 press).
- 575 6. Steel, A., Robertson, C. E. & Taube, J. S. (2021). Current promises and limitations of  
576 combined virtual reality and functional magnetic resonance imaging research in humans:  
577 A commentary on Huffman and Ekstrom (2019). *J. Cogn. Neurosci.* *33*, 159–166.
- 578 7. Tolman, E. C. Cognitive maps in rats and men. (1948). *Psychol. Rev.* *55*, 189–208.
- 579 8. Colgin, L. L., Moser, E. I. & Moser, M.-B. (2008). Understanding memory through  
580 hippocampal remapping. *Trends Neurosci.* *31*, 469–477.
- 581 9. Geva-Sagiv, M., Romani, S., Las, L. & Ulanovsky, N. (2016). Hippocampal global remapping  
582 for different sensory modalities in flying bats. *Nat. Neurosci.* *19*, 952–958.
- 583 10. Markus, E. J., Barnes, C. A., McNaughton, B. L., Gladden, V. L. & Skaggs, W. E. (1994).  
584 Spatial information content and reliability of hippocampal CA1 neurons: Effects of visual  
585 input. *Hippocampus* *4*, 410–421.
- 586 11. Quirk, G. J., Muller, R. U. & Kubie, J. L. (1990). The firing of hippocampal place cells in the  
587 dark depends on the rat’s recent experience. *J. Neurosci.* *10*, 2008–2017.
- 588 12. Save, E., Nerad, L. & Poucet, B. (2000). Contribution of multiple sensory information to  
589 place field stability in hippocampal place cells. *Hippocampus* *10*, 64–76.
- 590 13. Radvansky, B. A., Oh, J. Y., Climer, J. R. & Dombeck, D. A. (2021). Behavior determines the  
591 hippocampal spatial mapping of a multisensory environment. *Cell Rep.* *36*, 109444.
- 592 14. Mao, D., Kandler, S., McNaughton, B. L. & Bonin, V. (2017). Sparse orthogonal population  
593 representation of spatial context in the retrosplenial cortex. *Nat. Commun.* *8*, 243.
- 594 15. Miller, A. M. P., Serrichio, A. C. & Smith, D. M. (2021). Dual-factor representation of the  
595 environmental context in the retrosplenial cortex. *Cereb. Cortex* *31*, 2720–2728.
- 596 16. Huffman, D. J. & Ekstrom, A. D. (2019). A modality-independent network underlies the  
597 retrieval of large-scale spatial environments in the human brain. *Neuron* *104*, 611–622.
- 598 17. Epstein, R. A. & Morgan, L. K. (2012). Neural responses to visual scenes reveals  
599 inconsistencies between fMRI adaptation and multivoxel pattern analysis.  
600 *Neuropsychologia* *50*, 530–543.
- 601 18. Aguirre, G. K. (2007). Continuous carry-over designs for fMRI. *NeuroImage* *35*, 1480–1494.
- 602 19. Aguirre, G. K., Mattar, M. G. & Magis-Weinberg, L. (2011). de Bruijn cycles for neural  
603 decoding. *NeuroImage* *56*, 1293–1300.
- 604 20. Epstein, R. A., Patai, E. Z., Julian, J. B. & Spiers, H. J. (2017). The cognitive map in humans:  
605 Spatial navigation and beyond. *Nat. Neurosci.* *20*, 1504–1513.
- 606 21. Barron, H. C., Garvert, M. M. & Behrens, T. E. (2016). Repetition suppression: A means to  
607 index neural representations using BOLD? *Philos. Trans. R. Soc. B* *371*, 20150355.

- 608 22. Morgan, L. K., MacEvoy, S. P., Aguirre, G. K. & Epstein, R. A. (2011). Distances between  
609 real-world locations are represented in the human hippocampus. *J. Neurosci.* *31*, 1238–  
610 1245.
- 611 23. Deuker, L., Bellmund, J. L., Schröder, T. N. & Doeller, C. F. (2016). An event map of memory  
612 space in the hippocampus. *eLife* *5*, e16534.
- 613 24. Nielson, D. M., Smith, T. A., Sreekumar, V., Dennis, S. & Sederberg, P. B. (2015). Human  
614 hippocampus represents space and time during retrieval of real-world memories. *Proc.*  
615 *Natl. Acad. Sci. U. S. A.* *112*, 11078–11083.
- 616 25. Walther, A. *et al.* (2016). Reliability of dissimilarity measures for multi-voxel pattern  
617 analysis. *NeuroImage* *137*, 188–200.
- 618 26. Chamizo, V., Manteiga, R. D., Rodrigo, T. & Mackintosh, N. J. (2006). Competition between  
619 landmarks in spatial learning: The role of proximity to the goal. *Behav. Processes* *71*, 59–  
620 65.
- 621 27. Stangl, M., Kanitscheider, I., Riemer, M., Fiete, I. & Wolbers, T. (2020). Sources of path  
622 integration error in young and aging humans. *Nat. Commun.* *11*, 2626.
- 623 28. Drucker, D. M. & Aguirre, G. K. (2009). Different spatial scales of shape similarity  
624 representation in lateral and ventral LOC. *Cereb. Cortex* *19*, 2269–2280.
- 625 29. Hatfield, M., McCloskey, M. & Park, S. (2016). Neural representation of object orientation:  
626 A dissociation between MVPA and Repetition suppression. *NeuroImage* *139*, 136–148.
- 627 30. O’Connell, T. P., Sederberg, P. B. & Walther, D. B. (2018). Representational differences  
628 between line drawings and photographs of natural scenes: A dissociation between multi-  
629 voxel pattern analysis and repetition suppression. *Neuropsychologia* *117*, 513–519.
- 630 31. Sapountzis, P., Schluppeck, D., Bowtell, R. & Peirce, J. W. (2010). A comparison of fMRI  
631 adaptation and multivariate pattern classification analysis in visual cortex. *NeuroImage*  
632 *49*, 1632–1640.
- 633 32. Ward, E. J., Chun, M. M. & Kuhl, B. A. (2013). Repetition suppression and multi-voxel  
634 pattern similarity differentially track implicit and explicit visual memory. *J. Neurosci.* *33*,  
635 14749–14757.
- 636 33. De Baene, W. & Vogels, R. (2010). Effects of adaptation on the stimulus selectivity of  
637 macaque inferior temporal spiking activity and local field potentials. *Cereb. Cortex* *20*,  
638 2145–2165.
- 639 34. Liu, Y., Murray, S. O. & Jagadeesh, B. (2009). Time course and stimulus dependence of  
640 repetition-induced response suppression in inferotemporal cortex. *J. Neurophysiol.* *101*,  
641 418–436.
- 642 35. Sawamura, H., Orban, G. A. & Vogels, R. (2006). Selectivity of neuronal adaptation does  
643 not match response selectivity: a single-cell study of the fMRI adaptation paradigm.  
644 *Neuron* *49*, 307–318.
- 645 36. Xu, Y., Turk-Browne, N. B. & Chun, M. M. (2007). Dissociating task performance from fMRI  
646 repetition attenuation in ventral visual cortex. *J. Neurosci.* *27*, 5981–5985.
- 647 37. Bellmund, J. L., Deuker, L. & Doeller, C. F. (2019). Mapping sequence structure in the  
648 human lateral entorhinal cortex. *eLife* *8*, e45333.
- 649 38. Koch, C., Li, S.-C., Polk, T. A. & Schuck, N. W. (2020). Effects of aging on encoding of walking  
650 direction in the human brain. *Neuropsychologia* *141*, 107379.
- 651 39. Walther, D. B., Caddigan, E., Fei-Fei, L. & Beck, D. M. (2009). Natural scene categories  
652 revealed in distributed patterns of activity in the human brain. *J. Neurosci.* *29*, 10573–  
653 10581.

- 654 40. Williams, M. A., Dang, S. & Kanwisher, N. G. (2007). Only some spatial patterns of fMRI  
655 response are read out in task performance. *Nat. Neurosci.* *10*, 685–686.
- 656 41. Saleem, A. B., Diamanti, E. M., Fournier, J., Harris, K. D. & Carandini, M. (2018). Coherent  
657 encoding of subjective spatial position in visual cortex and hippocampus. *Nature* *562*,  
658 124–127.
- 659 42. Brennan, E. K. W., Sudhakar, S. K., Jedrasiak-Cape, I., John, T. T. & Ahmed, O. J. (2020).  
660 Hyperexcitable neurons enable precise and persistent information encoding in the  
661 superficial retrosplenial cortex. *Cell Rep.* *30*, 1598-1612.e8.
- 662 43. Fischer, L. F., Soto-Albors, R. M., Buck, F. & Harnett, M. T. (2020). Representation of visual  
663 landmarks in retrosplenial cortex. *eLife* *9*, e51458.
- 664 44. Diersch, N., Valdes-Herrera, J. P., Tempelmann, C. & Wolbers, T. (2021). Increased  
665 hippocampal excitability and altered learning dynamics mediate cognitive mapping  
666 deficits in human aging. *J. Neurosci.* *41*, 3204–3221.
- 667 45. Patai, E. Z. *et al.* (2019). Hippocampal and retrosplenial goal distance coding after long-  
668 term consolidation of a real-world environment. *Cereb. Cortex* *29*, 2748–2758.
- 669 46. Vann, S. D., Aggleton, J. P. & Maguire, E. A. (2009). What does the retrosplenial cortex do?  
670 *Nat. Rev. Neurosci.* *10*, 792–802.
- 671 47. Oh, S. W. *et al.* (2014). A mesoscale connectome of the mouse brain. *Nature* *508*, 207–  
672 214.
- 673 48. van Groen, T. & Wyss, J. M. (1992). Connections of the retrosplenial dysgranular cortex in  
674 the rat. *J. Comp. Neurol.* *315*, 200–216.
- 675 49. Kobayashi, Y. & Amaral, D. G. (2003). Macaque monkey retrosplenial cortex: II. Cortical  
676 afferents. *J. Comp. Neurol.* *466*, 48–79.
- 677 50. Mao, D. *et al.* (2018). Hippocampus-dependent emergence of spatial sequence coding in  
678 retrosplenial cortex. *Proc. Natl. Acad. Sci. U. S. A.* *115*, 8015–8018.
- 679 51. Mao, D., Molina, L. A., Bonin, V. & McNaughton, B. L. (2020). Vision and locomotion  
680 combine to drive path integration sequences in mouse retrosplenial cortex. *Curr. Biol.* *30*,  
681 1680-1688.e4.
- 682 52. Kitamura Takashi *et al.* (2017). Engrams and circuits crucial for systems consolidation of a  
683 memory. *Science* *356*, 73–78.
- 684 53. Lisman, J. E. & Grace, A. A. (2005). The hippocampal-VTA Loop: Controlling the entry of  
685 information into long-term memory. *Neuron* *46*, 703–713.
- 686 54. Witter, M. P. (1993). Organization of the entorhinal—hippocampal system: A review of  
687 current anatomical data. *Hippocampus* *3*, 33–44.
- 688 55. Wolbers, T. & Büchel, C. (2005). Dissociable retrosplenial and hippocampal contributions  
689 to successful formation of survey representations. *J. Neurosci.* *25*, 3333–3340.
- 690 56. Bates, S. L. & Wolbers, T. (2014). How cognitive aging affects multisensory integration of  
691 navigational cues. *Neurobiol. Aging* *35*, 2761–2769.
- 692 57. Nardini, M., Jones, P., Bedford, R. & Braddick, O. (2008). Development of cue integration  
693 in human navigation. *Curr. Biol.* *18*, 689–693.
- 694 58. Cheng, K. (1986). A purely geometric module in the rat’s spatial representation. *Cognition*  
695 *23*, 149–178.
- 696 59. Sutton, J. E., Joanisse, M. F. & Newcombe, N. S. (2010). Spinning in the scanner: Neural  
697 correlates of virtual reorientation. *J. Exp. Psychol. Learn. Mem. Cogn.* *36*, 1097–1107.
- 698 60. In, M.-H. & Speck, O. (2012). Highly accelerated PSF-mapping for EPI distortion correction  
699 with improved fidelity. *Magn. Reson. Mater. Phys. Biol. Med.* *25*, 183–192.

- 700 61. Shine, J. P., Valdés-Herrera, J. P., Hegarty, M. & Wolbers, T. (2016). The human  
701 retrosplenial cortex and thalamus code head direction in a global reference frame. *J.*  
702 *Neurosci.* *36*, 6371–6381.
- 703 62. Dale, A. M., Fischl, B. & Sereno, M. I. (1999). Cortical surface-based analysis. I.  
704 Segmentation and surface reconstruction. *NeuroImage* *9*, 179–194.
- 705 63. Epstein, R. A. (2008). Parahippocampal and retrosplenial contributions to human spatial  
706 navigation. *Trends Cogn. Sci.* *12*, 388–396.
- 707 64. Yushkevich, P. A. *et al.* (2006). User-guided 3D active contour segmentation of anatomical  
708 structures: significantly improved efficiency and reliability. *Neuroimage* *31*, 1116–1128.
- 709 65. Berron, D. *et al.* (2017). A protocol for manual segmentation of medial temporal lobe  
710 subregions in 7 Tesla MRI. *NeuroImage Clin.* *15*, 466–482.
- 711 66. Hooke, R. & Jeeves, T. A. (1961). “Direct search” solution of numerical and statistical  
712 problems. *J. Assoc. Comput. Mach.* *8*, 212–229.
- 713 67. Nichols, T. E. & Holmes, A. P. (2002). Nonparametric permutation tests for functional  
714 neuroimaging: A primer with examples. *Hum. Brain Mapp.* *15*, 1–25.
- 715 68. Rouder, J. N., Speckman, P. L., Sun, D., Morey, R. D. & Iverson, G. (2009). Bayesian t tests  
716 for accepting and rejecting the null hypothesis. *Psychon. Bull. Rev.* *16*, 225–237.
- 717 69. Jeffreys H. (1961). *The theory of probability*. (Oxford University Press).
- 718 70. Mumford, J. A., Poline, J.-B. & Poldrack, R. A. (2015). Orthogonalization of Regressors in  
719 fMRI Models. *PLOS ONE* *10*, e0126255.
- 720 71. Kriegeskorte, N., Mur, M. & Bandettini, P. A. (2008). Representational similarity analysis-  
721 connecting the branches of systems neuroscience. *Front. Syst. Neurosci.* *2*, 4.
- 722 72. Tong, F. & Pratte, M. S. (2012). Decoding patterns of human brain activity. *Annu. Rev.*  
723 *Psychol.* *63*, 483–509.
- 724 73. Shine, J., Valdes-Herrera, J. P., Tempelmann, C. & Wolbers, T. (2019). Evidence for  
725 allocentric boundary and goal direction information in the human entorhinal cortex and  
726 subiculum. *Nat. Commun.* *10*, 1–10.
- 727 74. Kruskal, J. & Wish, M. (1978). *Multidimensional Scaling*. (SAGE Publications, Inc.).
- 728 75. Gower, J. C. & Dijksterhuis, G. B. (2004). Procrustes problems. in *Oxford Statistical Science*  
729 *Series* (Oxford University Press).
- 730 76. Shinkareva, S. V., Wang, J. & Wedell, D. H. (2013). Examining similarity structure:  
731 multidimensional scaling and related approaches in neuroimaging. *Comput. Math.*  
732 *Methods Med.* *2013*, 796183–796183.
- 733 77. Marchette, S. A., Vass, L. K., Ryan, J. & Epstein, R. A. (2014). Anchoring the neural compass:  
734 coding of local spatial reference frames in human medial parietal lobe. *Nat. Neurosci.* *17*,  
735 1598–1606.
- 736 78. Peer, M. & Epstein, R. A. (2021). The human brain uses spatial schemas to represent  
737 segmented environments. *Curr. Biol.* *31*, 4677-4688.e8.
- 738 79. Persichetti, A. S. & Dilks, D. D. (2019). Distinct representations of spatial and categorical  
739 relationships across human scene-selective cortex. *Proc. Natl. Acad. Sci.* *116*, 21312.
- 740 80. Yan, W. *et al.* (2019). Discriminating schizophrenia using recurrent neural network applied  
741 on time courses of multi-site fMRI data. *EBioMedicine* *47*, 543–552.
- 742 81. Zhang, H. *et al.* (2015). Gamma power reductions accompany stimulus-specific  
743 representations of dynamic events. *Curr. Biol.* *25*, 635–640.
- 744 82. Liu, T. T. (2004). Efficiency, power, and entropy in event-related fMRI with multiple trial  
745 types. Part II: design of experiments. *NeuroImage* *21*, 401–413.
- 746

## 747 **STAR Methods**

748

749

### 750 EXPERIMENTAL SETUP AND SUBJECT DETAILS

751

#### 752 **Participants**

753 Twenty healthy adult volunteers from the Magdeburg community participated in this  
754 experiment (10 male; mean age = 25.35 year old, standard deviation of age = 3.91 year). All  
755 participants were right-handed, had normal or corrected-to-normal vision, and had no  
756 neurological diseases. Three additional participants were tested but were excluded from data  
757 analysis, either because they dropped out in the middle of the experiment or because the  
758 fMRI data were corrupted by technical problems. All participants gave informed consent prior  
759 to the experiment and received monetary compensation after the experiment. The  
760 experiment was approved by the Ethics Committee of the University of Magdeburg.

761

#### 762 **Stimuli and navigation task**

763 Virtual environments were created and rendered in Worldviz 5.0 (<https://www.worldviz.com>).  
764 There were two different virtual environments, a city environment and a nature environment  
765 (Figure 1a). These two environments had different background views and different ground  
766 textures. A linear track was included in both environments. The linear tracks were covered  
767 with the same texture but rendered in different colors in the two environments. The linear  
768 tracks shared the same object configuration in the two environments (Figure 1b). Three  
769 arrows and a tree were positioned at the object layout on the track. The tree was slightly to  
770 the left from the imagery midline of the linear track (= 0.5 m). In between the arrows and the  
771 tree were four balls of different colors positioned at four test locations. The four test locations  
772 were evenly spaced in the linear track with intervals of 4 m. To further distinguish the two  
773 environments, the order of the four balls was reversed between the two environments, but  
774 they occupied the same four test locations in both environments. Both the arrows and the  
775 tree were identical but rendered in different colors in different environments.

#### 776 *Learning task*

777 Participants used a MRI-compatible joystick to navigate around in the virtual environments  
778 and give responses. Participants were trained to learn four test locations that were evenly  
779 spaced on the linear track (Figure 1a). Four balls of different color were positioned at the four

780 test locations. Participants needed to remember the colors of the balls associated with the  
781 test locations (see the video – the part “LEARNING”).

782 *Test: Location identification task*

783 In the ‘location identification task’, the participant was passively transported to one  
784 of the four test locations, and was required to recall the color of the ball positioned at this  
785 test location, while the ball remained invisible throughout the trial. The time course of a trial  
786 is depicted in Figure 1b (also see the video – the part “TEST: location identification task”). In  
787 each trial, the starting position of the passive movement was randomly sampled from a  
788 uniform distribution  $U(-18\text{m}, -4\text{m})$  on a trial-by-trial basis (Figure 1a). Once the passive  
789 movement had stopped, the participant’s first-person perspective was fixed at the test  
790 location for 4s, after which they had to report the color of the ball positioned at the location  
791 they thought they were now occupying. Importantly, the order of the four options appearing  
792 on the screen was randomized from trial to trial, and a randomly selected option was  
793 highlighted as the initial answer before the participant started to make response. In addition,  
794 participants pressed only one particular button on the joystick to switch among the options  
795 in a loop. In this way, each test location was not associated with any fixed option position on  
796 the screen or with any consistent pattern of finger movement on the joystick. To prevent pure  
797 timing or counting strategies, the movement speed was randomly sampled from a uniform  
798 distribution  $U(2 \text{ m/s}, 5 \text{ m/s})$  on a trial-by-trial basis. Accuracy was emphasized, but  
799 participants were instructed to not spend longer time than necessary.

800 The use of self-motion cues and landmark cues was dissociated in the task, in a way  
801 similar to Chen et al. (2019) with minor adjustments<sup>3</sup>. This manipulation followed the logic  
802 of dissociation of landmark and self-motion cues in established behavioral paradigms<sup>1,56,57</sup>.  
803 In the self-motion condition, the arrows and the linear track texture were both visible.  
804 Because the arrows could serve as the anchoring point for path integration on travelled  
805 distance, the participant could perform path integration on travelled distance based on optic  
806 flow after he/she had passed the arrows. The landmark was not visible, meaning that  
807 landmark-based navigation was eliminated. To prevent participants from associating the test  
808 locations with any spatially isolated features on the ground, which would resemble the  
809 landmark-based navigation strategy (e.g., the red ball’s position was always within the  
810 brightest patch of the ground), both the texture of the linear track and the texture of the floor



811 outside of the linear track were randomly shifted in position along the long dimension of the  
812 track from trial to trial based on a uniform distribution  $U(-50m, 50m)$ .

813 On the contrary, in the landmark condition, the landmark was visible, meaning that  
814 the participant could rely on the landmark for localization. To eliminate path integration, the  
815 arrows were invisible, and the ground of the linear track remained blank to remove the  
816 texture information. Although there was still peripheral optical flow stemmed from the floor  
817 texture outside of the linear track, since the starting position of the passive movement was  
818 randomized on a trial-by-trial basis and the anchoring point for path integration (i.e., the  
819 arrows) was invisible, the participant could not perform path integration to solve the task, i.e.,  
820 the participant would not know how far he/she needed to travel to reach a ball location. The  
821 cue manipulation in the landmark condition is analogous to the disorientation manipulation  
822 typically used to eliminate self-motion information in spatial navigation studies<sup>58,59</sup>.

823

## 824 **Experimental procedure**

825 The experiment took place on three consecutive days, with behavioral training on the 1<sup>st</sup> day  
826 (Pre-scan\_day) and MRI scanning on the 2<sup>nd</sup> day (MRI\_day1) and 3<sup>rd</sup> day (MRI\_day2) (Figure  
827 1c). The time interval between Pre-scan\_day and MRI\_day1 varied between 1-17 days  
828 (mean=2.75), and the time interval between MRI\_day1 and MRI\_day2 varied between 1-17  
829 days (mean = 4.35). For two participants, the time interval between the two scanning days  
830 was 17 days, due to the restricted availability of the participants and the MRI scanner.

### 831 *Behavioral training (Pre-scan\_day)*

832 The behavioral training allowed the participants to get familiar with the virtual reality  
833 environment and to learn the four test locations. The training consisted of three parts. Each  
834 part had a learning stage and a test stage. During the learning stage (see the video – the part  
835 “LEARNING”), first, participants learned the colors of the balls positioned at the four test  
836 locations and were tested on their memory of the colors. Next, they learned the locations of  
837 the four balls. In each trial, one ball was displayed, and the participant actively moved from a  
838 randomized starting position to the ball’s location. Both the landmark and self-motion cues  
839 were available, meaning the arrows, the tree, and the ground texture of the linear track were  
840 all visible. Each ball was learned twice, with the order of the four balls counterbalanced. The  
841 learning stage was performed twice for each environment, with the order of the two  
842 environments counterbalanced. The learning stage was identical for all the three parts in the

843 Pre-scan day. During the test stage, the participant was tested in the ‘location identification  
844 task’, as described in the preceding section (Figure 1b; also see the video – the part “TEST:  
845 location identification task” ). There were four blocks in total (counterbalanced),  
846 corresponding to the four combinations of environment (city vs. nature) and cue condition  
847 (self-motion vs. landmark). In the first part, each block had 4 trials, corresponding to the four  
848 ball locations (counterbalanced). In the second and the third parts, during the test stage, each  
849 block had 16 trials, with 4 trials for each ball location (counterbalanced). The experimenter  
850 carefully instructed the participants from the beginning to the end during the first part of the  
851 Pre-scan training. For the remaining two parts of the training, participants were left alone to  
852 perform the tasks, but were attended by the experimenter when needed.

### 853 *MRI scanning (MRI\_day1 & MRI\_day2)*

854 The two scanning day sessions shared the same procedure. On each scanning day, we first re-  
855 familiarized participants with the task by requiring them to practice the task while they were  
856 undergoing structural scanning inside the scanner. The practice stage was exactly the same  
857 as the first part in the behavioral training day (Pre-scan\_day). This practice stage lasted about  
858 5 minutes and was not analyzed further. During the subsequent functional scanning,  
859 participants performed the ‘location identification task’ (Figure 1b; also see the video – the  
860 part “TEST: location identification task” ). On each scanning day, there were eight runs in  
861 total, with two runs for each of the four combinations of environment (city vs. nature) and  
862 cue condition (self-motion vs. landmark). The eight runs were organized in two blocks, and in  
863 each block, each of the four runs corresponded to one of the four condition combinations. In  
864 each block, the four condition combinations were semi-randomized in order, using Latin  
865 square designs and with the restriction that the combinations occurring in two successive  
866 runs must be different within the same day.

867 We adopted a continuous carry-over design<sup>18</sup>. We used the eight de Bruijn sequences  
868 from our previous study with relatively high detection power and low correlation coefficient  
869 <sup>3</sup>. These de Bruijn sequences were generated with 2nd order counterbalancing, using the  
870 ‘path-guided’ approach<sup>19</sup>. In these de Bruijn sequences, the ‘carry-over’ effects (i.e., the  
871 influence of a prior item on the brain response to the current item) were counterbalanced,  
872 allowing us to investigate fMRI adaptation and multi-voxel pattern similarity simultaneously  
873 with the same set of trials<sup>18,22</sup>. There were five types of events in each sequence – fixation

874 periods at the four test locations, in which participants stayed at the test locations for 4s, and  
875 null events, in which participants fixated their eyes at a cross displayed in the middle of the  
876 blank screen. Each de Bruijn sequence contained 25 events in total, with five repetitions for  
877 each event type. To allow the hemodynamic response to reach a steady state before the  
878 sequence started, we duplicated the very last event in the sequence and placed it at the very  
879 beginning. This duplicated event was modeled in the first-level GLMs, but was not included  
880 for the analyses of the fMRIa or MVPS effects. Therefore, in each run, there were 20 effective  
881 trials in total for the fMRIa and MVPS analyses, with five trials for each of the four test  
882 locations. These eight de Bruijn sequences were then randomly assigned to the eight runs in  
883 each scanning day for each participant.

884 On each day, the functional MRI scanning lasted up to about 1 hour, and the total  
885 scanning time lasted up to about 1.75 hour.

886

#### 887 **MRI acquisition**

888 Structural and functional images were acquired in a 7T MR scanner (Siemens, Erlangen,  
889 Germany) at the Leibniz Institute for Neurobiology in Magdeburg with a 32-channel head coil  
890 (Nova Medical, Wilmington, MA). A high-resolution whole-brain T1-weighted structural scan  
891 was acquired with the following MP-RAGE sequence: TR = 1700 ms; TE = 2.01 ms; flip angle =  
892 5°; slices = 176; orientation = sagittal; resolution = 1 mm isotropic. A partial-volume turbo spin  
893 echo high-resolution T2-weighted structural scan was acquired perpendicular to the long axis  
894 of the hippocampus (TR = 8000 ms; TE = 76 ms; flip angle = 60°; slices = 55; slice thickness = 1  
895 mm; distance factor = 10%; in-plane resolution = 0.4 × 0.4 mm; echo spacing = 15.1 ms,  
896 turbo factor = 9, echo trains per slice = 57). Functional scans were acquired with a T2\*-  
897 weighted 2D echo planar image slab centered on the hippocampus and parallel to its long axis  
898 (TR = 2000 ms, TE = 22 ms; flip angle = 85 °; slices = 35; resolution = 1 mm isotropic, parallel  
899 imaging with grappa factor 1, echo spacing = 0.82 ms). We also obtained 10 volumes of whole  
900 brain functional scans for the purpose of co-registering anatomical masks obtained on the T2-  
901 weighted structural scan to functional scans with a MPRAGE sequence (TR = 5000 ms, TE = 22  
902 ms; flip angle = 85 °; slices = 100; resolution = 1.6 mm isotropic). The T1-weighted structural  
903 image was bias-corrected in SPM12. Functional scans were motion and distortion corrected  
904 online via point spread function mapping<sup>60</sup>. Functional scans were left spatially unsmoothed.

905 Figure 1d shows the T2-weighted structural scan and a functional scan overlaid on the T1-  
906 weighted structural scan for an exemplary participant.

907

### 908 **Anatomical masks for regions of interest**

909 As our regions of interest (ROI), we focused the retrosplenial cortex (RSC) and brain regions  
910 in the medial temporal lobe (MTL), including hippocampus, parahippocampal cortex (PHC),  
911 entorhinal cortex (EC), and perirhinal cortex (PRC). All the anatomical masks were obtained  
912 in the native space of each participant's structural scans. To illustrate, Figure 1d, Figure S4a,  
913 and Figure S5c displays the anatomical masks for an exemplary participant.

914 The procedure for obtaining the anatomical mask for RSC was identical to that used in  
915 a previous study in our lab (Shine et al., 2016). RSC mask was automatically extracted from  
916 each participant's T1-weighted structural scan (bias-corrected in Advanced Normalization  
917 Tools (ANTs)) in Freesurfer<sup>62</sup>, using the 'recon-all' command. RSC was defined as the  
918 posterior-ventral portion of the cingulate gyrus, which mainly consists of BA29/30. Note that  
919 the definition of RSC is anatomically different from the retrosplenial complex, which is a  
920 functionally defined region typically extending into the parieto-occipital sulcus<sup>63</sup>. Although  
921 we did not investigate the retrosplenial complex in the ROI-based analyses, we conducted  
922 corresponding fMRI analyses to explore in the entire volume that likely included the putative  
923 retrosplenial complex (Figure 1d).

924 Brain regions in MTL were manually segmented in each participant's T2-weighted  
925 structural scan in ITK-SNAP (Yushkevich et al., 2006; <http://www.itksnap.org/pmwiki/pmwiki.php>), following the protocol developed by Berron,  
926 Vieweg and colleagues<sup>65</sup>. As shown in Figure S5c, the hippocampus was further segmented  
928 into different subfields (CA1, CA2, CA3, subiculum (SUB), dentate gyrus (DG), and tail), using  
929 the same protocol<sup>65</sup>. As shown in Figure S4a, EC was further divided into the anterior-lateral  
930 subregion (alEC) and the posterior-medial subregion (pmEC), following the procedure  
931 developed in our previous study<sup>3</sup>.

932 The anatomical mask for RSC was first co-registered to the mean functional scan along  
933 with the T1-weighted structural scan in SPM12; then the co-registered anatomical mask was  
934 resliced using the nearest-neighbor interpolation, with the mean functional scan as the  
935 reference image. The anatomical masks for the MTL regions were co-registered to the mean  
936 functional scan of the first scanning day in SPM12, using the same procedure adopted in our

937 previous study<sup>3</sup>: first, the mean whole-volume functional scan was co-registered to the mean  
938 functional scan; second, the T2-weighted structural scan, along with the anatomical masks,  
939 were co-registered to the mean whole-volume functional scan obtained from the first step;  
940 third, the co-registered anatomical masks were re-sliced using nearest-neighbor interpolation,  
941 with the mean functional scan as the reference image.

942

943

944 STATISTICAL ANALYSIS

945

946 **Behavioral data analyses**

947 We calculated behavioral accuracy based on whether the answer was correct (coded as 1) or  
948 not (coded as 0), with a chance level of 0.25. For the two scanning days, the first trial of the  
949 sequence in each block was not included in the analysis, because it was not included in the  
950 main fMRI analyses and did not appear to differ from other trials in the sequence. In the main  
951 text, we focused on behavioral data from the two scanning days (Figure 2). We reported  
952 results of the behavioral data from all the three days in the supplemental information (Table  
953 S5).

954

955 **Cognitive modeling to recover representational precision from behavior**

956 To dissociate representational precision from response bias in behavioral performance, we  
957 applied an extension of signal detection theory to our location identification task with four  
958 choices. In the modeling, we included eight free parameters to model i) the four standard  
959 deviations of the underlying representations of the four test locations ( $S_1, S_2, S_3, S_4$ ), ii) the  
960 three response criterions ( $C_{12}, C_{23}, C_{34}$ ), and iii) the lapse rate ( $lr$ ). The lapse rate represents  
961 the proportion of trials in which participants completely failed in attention and simply chose  
962 a response randomly. The centers of the representation distributions (i.e.,  $\mu_1, \mu_2, \mu_3, \mu_4$ ) were  
963 assumed to be at the true positions of the test locations (i.e.,  $\mu_1 = -6m, \mu_2 = -2m, \mu_3 = 2m$ , and  
964  $\mu_4 = 6m$ ).

965 In each simulation, we constructed the behavioral confusion matrix, given a set of  
966 algorithm-generated values for the eight free parameters. Specifically, for the  $(1 - lr)$   
967 proportion of the trials, we randomly sampled a sensory input ( $x$ ) from the normal  
968 distribution of the underlying representation corresponding to the test location presented in

969 that trial,  $N(\mu_r, S_r)$ . Then, a response  $R(x)$  was made by comparing the sensory input to the  
970 three response criterions:

$$971 \quad R(x) = \begin{cases} Loc1, & x < C_{12} \\ Loc2, & C_{12} \ll x < C_{23} \\ Loc3, & C_{23} \ll x < C_{34} \\ Loc4, & x > C_{34} \end{cases}$$

972

973 For the remaining  $lr$  proportion of the trials, we randomly selected one of the four choices as  
974 the response, regardless of the current sensory input.

975 In each simulation, we simulated 10000 trials for each of the four test locations to  
976 construct the 4x4 theoretical behavioral confusion matrix. We normalized the theoretical  
977 behavioral confusion matrix so that elements in the matrix ranged from 0 to 1, each  
978 representing the probability of a response falling to a certain cell of the matrix (i.e.,  $P_{r,c}$  –  
979 probability of location  $r$  recognized as location  $c$ ). We then compared the actual behavioral  
980 confusion matrix (Figure 2b) to the theoretical behavioral confusion matrix, by computing the  
981 probability of observing each actual response given the theoretical matrix (log-transformed).  
982 Finally, we summed the probabilities of all actual responses,

$$983 \quad \sum_{n=1}^N \log(P_{r,c})$$

984 in which  $n$  represents the trial number and  $N$  represents the total number of trials in the  
985 actual experiment. We repeated the simulation to maximize this summed probability (i.e.,  
986 maximum likelihood estimation). We used the Hooke & Jeeves hill-climbing algorithm for  
987 model optimization<sup>66</sup>, as implemented in Matlab\_R2020a. To avoid the potential local-  
988 minima problem, the model-fitting procedure was repeated 20 times with randomized  
989 starting values for the parameters each time, and the parameter estimates with the best fit  
990 were selected (Figure 2c.1).

991 We performed bootstrapping to estimate variabilities of the estimates for these free  
992 parameters. In each iteration, we randomly sampled the same number of responses from the  
993 actual responses with replacement for each test location. We then submitted the sampled  
994 data to the abovementioned model fitting procedure, and obtained the estimates for the free  
995 parameters. The procedure was repeated 600 times, resulting in distributions for all the eight  
996 free parameters. 95% confidence intervals of these estimates were obtained from these  
997 bootstrapped distributions (i.e., error bars in Figure 2c.2 and Figure 2c.3).

998 To evaluate how well the model fitted the data (Figure 2c.4), we simulated the  
999 behavioral confusion matrix, using the best-fitting values of the eight parameters. We  
1000 simulated 1000 trials for each test location. We then calculated Pearson correlation between  
1001 the simulated confusion matrix with the actual confusion matrix. R-squared was taken as a  
1002 measurement of goodness-of-fit of the model, i.e., the proportion of variance in the data  
1003 explained by the model. Because the numbers of correct trials and incorrect trials differed  
1004 dramatically, we evaluated the model fit separately for correct and incorrect trials, as well as  
1005 separately for the landmark condition and the self-motion condition.

1006

## 1007 **Functional MRI analyses**

### 1008 *Univariate analysis of fMRI adaptation*

1009 We constructed a first-level general linear model (fMRIa-GLM1) to assess fMRI adaptation  
1010 (fMRIa). In the model setup, for the regressors that modeled the location occupation periods  
1011 (Figure 1b, phase 4 'location occupation'), we included parametric regressors modeling the  
1012 modulatory effects of the spatial distance between two successively visited locations. In the  
1013 self-motion condition, these parametric regressors modeled inter-location distance in a  
1014 continuous manner by default, i.e., containing values of 0m, 4m, 8m, and 12m. In the  
1015 landmark condition, these parametric regressors modeled same locations vs. different  
1016 locations, i.e., containing values of 0 (the two locations were the same) and 1 (the two  
1017 locations were different), based on a previous report<sup>22</sup>. The location occupation periods that  
1018 could not be modeled for fMRIa (i.e., test locations preceded by the null event and the first  
1019 location occupation event) were modeled with separate regressors. The passive movement  
1020 phase was modeled with separate regressors, separately for each run and each cue type, but  
1021 irrespective of the test location. The 16 runs were modeled with separate regressors. The  
1022 events were convolved with the canonical hemodynamic response function, with the time  
1023 derivative modeled. Head motion parameters (three rotations and three translations) were  
1024 entered into the model as nuisance regressors, separately for the 16 runs. Each run was  
1025 modeled with a constant variable.

1026 We conducted univariate fMRIa analyses based on both objective location (where the  
1027 participant was actually located) and subjective location (the participant's response, i.e.,  
1028 where the participant thought he/she was located). Because in the location identification task,  
1029 the participant was required to explicitly judge the identity of each ball, we could construct

1030 the parametric modulation regressors of inter-location distance in terms of subjective  
1031 location in addition to objective location. For example, if the participant visited Loc1 and Loc3  
1032 in two successive trials, but reported “Loc2” and “loc3” in these two trials, the objective-  
1033 location-based spatial distance was calculated as the physical distance between Loc1 and  
1034 Loc3 (= 8m), and the subjective-location-based spatial distance was calculated as the physical  
1035 distance between Loc2 and Loc3 (= 4m). First, we assessed the overall contributions of  
1036 objective location and subjective location to fMRIa via two versions of fMRIa-GLM1. In fMRIa-  
1037 GLM1a the parametric regressors of spatial relations were defined by objective location,  
1038 whereas in fMRIa-GLM1b defined by subjective location. The beta estimates of the  
1039 parametric regressors represented the overall contributions of objective location in fMRIa-  
1040 GLM1a and subjective location in fMRIa-GLM1b to fMRIa. Images of the beta estimates for  
1041 the regressors were left spatially unsmoothed.

1042 At the group-level, in the ROI-based analysis, beta estimates for fMRIa of all the voxels  
1043 in the ROI were averaged. Then participant-specific beta estimates of the four fMRIa  
1044 measurements (i.e., location type (objective-location-based vs. subjective-location-based) X  
1045 cue type (landmark vs. self-motion)) were tested using directional one-sample t tests  
1046 separately to obtain the uncorrected significance levels (i.e.,  $p_{\text{uncorrected}}$ ). Next, the four  
1047 measurements were submitted to a multiple comparisons correction approach that combines  
1048 the nonparametric permutation-based maximum-t-statistic method<sup>67</sup> and the Holm-  
1049 Bonferroni method, to control the familywise type I error at 0.05. Specifically, first, in every  
1050 permutation, every entry in each measurement was randomly multiplied by -1 or +1, and the  
1051 t statistic was calculated for the permuted data of each measurement. Next, the maximum t  
1052 statistic was obtained out of all the measurements. After 5000 permutations, we obtained a  
1053 surrogate distribution of maximum t statistic, to which we compared the observed t statistic  
1054 calculated from the actual data in each measurement. The significance level (i.e.,  $p_{\text{corrected}}$ )  
1055 equaled to the proportion of values in the surrogate distribution of maximum t statistic that  
1056 were greater than the observed t statistic. This permutation procedure was performed  
1057 iteratively, in that if the measurement with the lowest uncorrected p value survived the test,  
1058 this measurement was deemed significant after multiple comparisons correction and was  
1059 excluded from further analysis. Next, the remaining measurements were submitted to the  
1060 same permutation test again. This procedure was repeated until the measurement with the



1061 lowest uncorrected p value did not pass the statistical significance threshold or no  
1062 measurements were left for testing. Results are depicted in Figure 3a.

1063 For each of the directional one-sample t tests, we calculated the Bayes factor ( $BF_{10}$ ),  
1064 which indicates the relative likelihood of the alternative hypothesis (i.e., the group mean was  
1065 greater than 0) over the null hypothesis (i.e., the group mean was not greater than 0)<sup>68</sup>. The  
1066 scale  $r$  on effect size we adopted was 0.707.  $BF_{10}$  greater than 3/10/30 indicates  
1067 moderate/strong/very-strong evidence for the alternative hypothesis, whereas  $BF_{10}$  less than  
1068 0.333/0.1/0.03 indicates moderate/strong/very-strong evidence for the null hypothesis<sup>69</sup>.

1069 To visualize fMRIa, we constructed first-level fMRIa-GLM3, in which different  
1070 regressors modeled the location occupation periods with different inter-location distances  
1071 between successively visited locations (i.e., 0m, 4m, 8m, and 12m). We then plotted beta  
1072 estimates of these regressors (i.e., estimated brain activation levels) as a function of inter-  
1073 location distance. Results are depicted in Figure 3c.

1074

#### 1075 *Disentangling objective location and subjective location in fMRIa*

1076 We constructed a first-level general linear model (fMRIa-GLM2) to directly compare  
1077 objective location and subjective location by disentangling their unique contributions to  
1078 fMRIa. In the model setup, we included two parametric regressors defined by objective  
1079 location and subjective location in the model, with no orthogonalization. We created two  
1080 versions of fMRIa-GLM2. The only difference between the two versions was the order in  
1081 which the parametric regressors were entered into the model. In fMRIa-GLM2a, the  
1082 objective-location-defined parametric regressor was entered first, followed by the subjective-  
1083 location-defined parametric regressor. In fMRIa-GLM2b, the order was reversed. We took the  
1084 beta estimate for the subjective-location-defined parametric regressor in fMRIa-GLM2a as  
1085 the unique contribution of subjective location, and the beta estimate for the objective-  
1086 location-defined parametric regressor in fMRIa-GLM2b as the unique contribution of  
1087 objective location<sup>70</sup>. Because some participants did not commit any mistakes in some runs,  
1088 which would result in exactly the same parametric regressors for objective location and  
1089 subjective location, we concatenated all the scans belonging to the same cue type together  
1090 across runs and days in SPM12. Run-wise head motions were modeled as nuisance regressors,  
1091 which resulted in  $6 * 16$  runs = 96 nuisance regressors in total. Images of the beta estimates  
1092 for the regressors were left spatially unsmoothed.

1093           At the group-level, in the ROI-based analysis, beta estimates for fMRIa of all the voxels  
1094 in the ROI were averaged. Then participant-specific beta estimates for the unique  
1095 contributions of objective location and subjective location were tested using directional one-  
1096 sample t test, separately.

1097           For each of the directional one-sample t tests conducted here, we calculated the Bayes  
1098 factor ( $BF_{10}$ ).

1099           Results are depicted in Figure 3b.

1100

### 1101 *fMRIa pattern similarity analysis*

1102 To investigate the voxel-to-voxel distribution patterns of fMRIa, we developed the fMRIa  
1103 pattern similarity analysis, which is analogous to the representational similarity analysis (RSA)  
1104 <sup>71</sup>. RSA is a form of multi-voxel pattern analyses. Conventionally, the multi-voxel pattern  
1105 analysis is applied to activation levels of voxels in fMRI studies <sup>72</sup>. Recently, these techniques  
1106 have been applied to other measurements, e.g., inter-region functional connectivity <sup>16</sup>. Here,  
1107 we applied the RSA technique to fMRIa, meaning that the basic elements in the computations  
1108 were the voxels' fMRIa magnitudes instead of their activation levels. If the spatially  
1109 distributed pattern of fMRIa across voxels was distinct between landmarks and self-motion  
1110 cues, this would indicate that the two cue types recruited dissociable neural representations  
1111 in terms of fMRIa.

1112           The fMRIa pattern similarity analysis was based on beta estimates of fMRIa as  
1113 estimated in fMRIa-GLM1. Images of the beta estimates for the regressors were left spatially  
1114 unsmoothed. The procedure is illustrated in Figure 4a. First, one fMRIa vector was estimated  
1115 for each run. The fMRIa vector contained the fMRIa estimates of all the voxels in the ROI, with  
1116 each element of the vector corresponding to the fMRIa magnitude (signed) of a voxel in the  
1117 ROI. Second, for each cue condition, in each scanning day, we divided the data into two parts  
1118 based on the chronological order, resulting in four parts in total for each cue type. In this way,  
1119 for each cue type, each part contained two fMRIa vectors from the two different  
1120 environments in two consecutive runs. To eliminate any subtle effects of environment, which  
1121 was not of our primary interest, we computed the mean fMRIa vector by averaging fMRIa for  
1122 each voxel across the two environments within each part (see a similar treatment to eliminate  
1123 possible subtle influences of an uninterested factor in fMRI multi-voxel pattern analysis in  
1124 Shine et al., 2019). This resulted in four mean fMRIa vectors in total for each cue type, with

1125 two mean vectors in each scanning day. Third, fMRIa pattern similarity was computed in a  
1126 cross-validated manner by calculating the Pearson correlation between the mean fMRIa  
1127 vectors from different parts (Walther et al., 2016). Specifically, within-cue similarity was  
1128 calculated as the Pearson correlation between the mean fMRI vectors of the same cue type.  
1129 Within-cue similarity was first calculated for the two cue types separately (i.e., within-  
1130 landmark similarity and within-motion similarity), and was then averaged across the cue types.  
1131 Between-cue similarity was calculated in the same manner, but the two mean fMRIa vectors  
1132 in the correlation calculation were from different cue types. We obtained the final estimates  
1133 of within-cue similarity and between-cue similarity by averaging all the Pearson correlations  
1134 (Fisher-transformed) calculated from all possible pairs of the mean fMRIa vectors. Finally, to  
1135 obtain the fMRIa pattern distinction score, we subtracted between-cue similarity from within-  
1136 cue similarity. We then tested the fMRIa pattern distinction score against 0, using 1-tailed  
1137 one sample t tests. A positive fMRIa pattern distinction score would indicate that the voxel-  
1138 to-voxel spatial distribution of fMRIa was distinct between the two cue types. Importantly, in  
1139 the analysis, we distinguished between within-day and between-day fMRIa pattern  
1140 distinction scores, given the possibility that the fMRIa pattern might not necessarily be stable  
1141 across days within the same cue type.

1142 For each of the t tests conducted in this analysis, we calculated the Bayes factor ( $BF_{10}$ ).  
1143 Results are depicted in Figure 4b.

1144

#### 1145 *Analysis of multi-voxel pattern similarity*

1146 To analyze multi-voxel pattern similarity of activation vectors (MVPS), we constructed MVPS-  
1147 GLM1 as the first-level general linear model (GLM), in which separate regressors modeled the  
1148 location occupation phase for the four test locations. No parametric regressors were included.  
1149 Other aspects of the model were the same as in the above-mentioned fMRIa-GLM1. The beta  
1150 images for the regressors were left spatially unsmoothed. Similar to the fMRIa analysis, we  
1151 created two versions of MVPS-GLM1: in MVPS-GLM1a, the location occupation regressors  
1152 were defined by objective locations (i.e., where the participant was actually located); in  
1153 MVPS-GLM1b, the location occupation regressors were defined by subjective locations (i.e.,  
1154 where the participant reported he/she was located).

1155 The MVPS analysis was conducted as follows (Figure 5a). In step 1, for each cue type  
1156 and scanning day, the dataset was divided into two parts chronologically, resulting in four

1157 parts in total for each cue type. For each cue type, within each part, the factor ‘environment’,  
1158 which was not of our main interest here, was averaged out by computing the mean activation  
1159 vector of the two consecutive runs belonging to the two environments for each test location.  
1160 Each element of the mean activation vector denotes the mean activation level averaged  
1161 across the two runs of each voxel in the ROI. Note that here, the test location was defined by  
1162 either objective location (MVPS-GLM1a) or subjective location (MVPS-GLM1b), as described  
1163 above. This resulted in four mean activation vectors for each location and each cue type. In  
1164 step 2, we calculated cross-validated activation pattern similarities by calculating Pearson  
1165 correlations between the mean activation vectors of pairwise test locations from different  
1166 parts. This resulted in the 4x4 activation pattern similarity matrix (Figure 5a.2). In step 3, the  
1167 activation pattern similarity matrix was averaged element-by-element across all possible part  
1168 pairs, resulting in the 4x4 mean activation pattern similarity matrix (Figure 5a.3). In step 4,  
1169 pairwise inter-location distances among the four test locations were calculated, resulting in  
1170 the 4x4 inter-location distance matrix that contained values of 0m, 4m, 8m, and 12m. In other  
1171 words, inter-location distance was modeled in a continuous manner. In the final step, the  
1172 spatial information score was calculated as the Pearson correlation between the mean  
1173 activation pattern similarity matrix (Fisher-transformed) and the inter-location distance  
1174 matrix, which was Fisher-transformed and reversed in sign. A positive information score  
1175 would indicate that spatial distance information among the test locations was encoded in the  
1176 BOLD signals, meaning that test locations were more similar to each other in neural  
1177 representations as the distance between them decreased.

1178 We calculated spatial information scores for landmarks, self-motion cues, and  
1179 between cue types, in which the mean activation vectors in the correlation calculation in step  
1180 2 were estimated both from the landmark condition, both from the self-motion condition,  
1181 and from different cue conditions, respectively. Importantly, the between-cue spatial  
1182 information score would be informative of whether the neural coding of spatial distance  
1183 information was generalizable between different cue types. We calculated spatial  
1184 information scores based on objective location using MVPS-GLM1a or subjective location  
1185 using MVPS-GLM1b.

1186 At the group-level, the six measurements of spatial information scores (i.e., location  
1187 type (objective-location-based vs. subjective-location-based) X measurement type (landmark  
1188 vs. self-motion vs. between-cue)) were tested using directional one-sample t tests separately,

1189 to obtain the uncorrected significance levels (i.e.,  $p_{\text{uncorrected}}$ ). Then, to control the familywise  
1190 type I error at 0.05, the six measurements were submitted to a multiple comparisons  
1191 correction approach that combines the nonparametric permutation-based maximum-t-  
1192 statistic method<sup>67</sup> and the Holm-Bonferroni method, as described in the previous section on  
1193 fMRIa.

1194 For each of the directional one-sample t tests conducted here, we calculated the Bayes  
1195 factor ( $BF_{10}$ ).

1196 Results are depicted in Figure 5b and Figure 5d.

1197

### 1198 *Disentangling objective location and subjective location in MVPS*

1199 To directly compare objective location and subjective location in MVPS, we attempted  
1200 to estimate the unique contributions of objective and subjective location to the overall MVPS  
1201 by conducting the following analysis. In the first-level general linear model MVPS-GLM2, we  
1202 modeled individual trials with separate regressors. Each trial was associated with two location  
1203 labels, one defined by objective location and the other defined by subjective location.  
1204 Whether the two labels matched or mismatched depended on the behavioral accuracy in that  
1205 trial. We computed cross-validated Pearson r correlation between single-trial-based  
1206 activation patterns from two different runs, resulting in a 20x20 activation pattern similarity  
1207 matrix for a run pair. Two 20x20 inter-location distance matrices were constructed, one based  
1208 on objective location and the other on subjective location. We then used these two inter-  
1209 location distance matrices (standardized) to predict the 20x20 activation pattern similarity  
1210 matrix (fisher-transformed and standardized) using the multiple linear regression analysis for  
1211 each run pair. The two regression coefficients (i.e., beta-unique; reversed in sign) denoted  
1212 the respective unique contributions of the two predictors, with the contributions of the other  
1213 predictor excluded. The multiple linear regression was performed for each run pair, and the  
1214 estimated regression coefficients were then averaged across all run pairs to obtain the final  
1215 estimates of unique contributions of objective location and subjective location, which were  
1216 then tested against 0 using directional one-sample t tests. Bayes factors ( $BF_{10}$ ) were also  
1217 computed.

1218 This analysis was conducted for the landmark condition, self-motion condition, and  
1219 between cue types, separately. For the landmark condition and self-motion condition, the  
1220 two runs in each run pair were from the same cue type, whereas for between cue types, they

1221 were from different cue types. Run pairs were assigned with a value of ‘NaN’ for the beta-  
1222 unique estimates and excluded from further analysis, when the behavioral performance was  
1223 perfect in both runs (i.e., the objective-location-based and the subjective-location-based  
1224 inter-location distance matrices were identical and perfectly correlated with each other).  
1225 When all the participants were considered, for the landmark condition, 64 out of  $28 * 20$   
1226 subjects = 560 run pairs (= 11.43%) had 100% accuracy rate and ‘NaN’ as the beta-unique  
1227 estimates. For the self-motion condition, 18 out of 560 run pairs (= 3.21%) had 100% accuracy  
1228 rate. For between cue types, 31 out of 1280 run pairs (= 2.42%) had 100% accuracy rate).

1229 Results are depicted in Figure 5c.

1230

### 1231 *Neural space reconstruction analysis*

1232 As an overview, in the neural space reconstruction analysis (Figure 6a), first, a certain form of  
1233 neural distance matrix was constructed for objective test locations, depending on the type of  
1234 fMRI effect being investigated. Elements in the neural distance matrix denote pairwise neural  
1235 distances between the test locations. Next, multi-dimensional scaling was performed on the  
1236 neural distance matrix to recover the spatial coordinates of the locations in the neural space,  
1237 following the basic principle that locations with greater representational similarities are  
1238 positioned closer to each other in the neural space <sup>74</sup>. Finally, the Procrustes analysis was  
1239 performed to map the estimated coordinates of the locations to the original physical space  
1240 through rotations and reflections <sup>75</sup>. The neural space reconstruction analysis is commonly  
1241 applied to multi-voxel activation patterns in fMRI studies <sup>76</sup>. In the current study, we applied  
1242 this analysis to fMRIa, in addition to MVPS (see the rationale below). The neural space was  
1243 reconstructed based on the neural distances between objective test locations (instead of  
1244 participants’ subjective locations).

1245 The procedure was the same for both MVPS and fMRIa, except for how the neural  
1246 distance matrix was constructed. For MVPS, in step 1, the neural distance between two test  
1247 locations (defined by objective location) was quantified by the degree of correlational  
1248 dissimilarity between their voxel-to-voxel activation patterns (e.g., 1-Pearson correlation),  
1249 based on MVPS-GLM1a. The neural distance between two test locations indicated how  
1250 ‘dissimilar’ they were in neural representations. To obtain the neural distance matrix, we  
1251 constructed the 4X4 representational dissimilarity matrix, with each element equal to 1 minus  
1252 the Pearson correlation between the activation patterns of two test locations. In step 2, we

1253 averaged symmetrical off-diagonal elements in the matrix. The four diagonal entries were  
1254 manually set to 0, because multidimensional scaling only exploits relative distances between  
1255 different items (also see <sup>77</sup>). Elements in the matrix were normalized to be within the range  
1256 [0, 1] as follows: normalized value= (original value- matrix minimum)/(matrix maximum –  
1257 matrix minimum). In step 3, the normalized neural distance matrix was subjected to  
1258 multidimensional scaling and the Procrustes analysis.

1259 For fMRIa, the neural distance between two test locations (defined by objective  
1260 location) could be quantified as the brain region's activation level for one location when  
1261 preceded by the other location - the lower the region's activation to the current location  
1262 when preceded by the other location, the larger the repetition suppression effect, the closer  
1263 the two test locations would be positioned to each other in the neural space. In step 1, we  
1264 constructed the adaptation matrix, which is parallel to the representational dissimilarity  
1265 matrix in MVPS. We relied on MVPS-GLM2, which modeled the location occupation phase in  
1266 individual single trials with separate regressors. These trials were classified into  $4 \times 4 = 16$   
1267 groups based on the combination of two locations visited in succession; the beta estimates  
1268 for trials from the same group were averaged, resulting in the  $4 \times 4$  adaptation matrix. In the  
1269 adaptation matrix, rows represent the previous location, columns represent the current  
1270 location, and each element represents the activation level at the current location when  
1271 preceded by the previous location. To keep it consistent with the main fMRIa analysis, the  
1272 fMRIa-based neural space reconstruction analysis was restricted to trials that could be  
1273 modeled for fMRIa (i.e., locations not preceded by the null event and not the first event in  
1274 the sequence).

1275 Nevertheless, to confirm that the baseline activation level was comparable for the  
1276 four test locations in RSC and the hippocampus, we estimated activation levels of RSC and  
1277 hippocampus for the four test locations using the trials that were not included in the  
1278 parametric regressors modeling fMRIa (i.e., test locations preceded by the null event and the  
1279 first event in the sequence in fMRIa-GLM1). We observed no significant differences among  
1280 the four locations in either RSC ( $F(3,57) = 0.742$ ,  $p = 0.531$ ,  $\eta_p^2 = 0.038$ ) or hippocampus  
1281 ( $F(3,57) = 0.875$ ,  $p = 0.459$ ,  $\eta_p^2 = 0.044$ ). In addition, there were no significant differences  
1282 among the four locations in baseline activation in any other ROIs in the medial temporal lobe  
1283 ( $F_s < 2.1$ ,  $p_s > 0.1$ ,  $\eta_p^2 < 0.1$ ). This verifies our choice of using the estimated brain activation

1284 level for the current location as an indicator of the neural distance between the current  
1285 location and the preceding location in fMRIa.

1286 The following two steps were the same as in the MVPS-based neural space  
1287 reconstruction analysis. In step 2, we normalized the adaptation matrix as to render all the  
1288 16 elements within the range [0, 1]. Elements that were diagonally symmetrical to each other  
1289 in the matrix were averaged, and the diagonal elements were manually set to 0. In step 3, the  
1290 normalized neural distance matrix was then subjected to multidimensional scaling and the  
1291 Procrustes analysis.

1292 To address the question of whether the neural space resembled the behavioral  
1293 performance pattern), we performed the neural space reconstruction analysis for each  
1294 participant. The reconstructed distances were submitted to a repeated-measures ANOVA test,  
1295 and with cue type (landmark vs. self-motion) and adjacent location pair (Loc1-2, Loc2-3, Loc3-  
1296 4) as independent variables. We were particularly interested in the interaction effect between  
1297 cue type and the linear trend of adjacent location pair, motivated by the observation of  
1298 differential representational precision patterns between the two cue types (Figure 2). Results  
1299 are depicted in Figure 6b.1 & 6c.1.

1300 We also addressed the question of whether the neural space resembled the original  
1301 physical space. To increase statistical power, the normalized neural distance matrix was  
1302 averaged across participants to obtain the grand group-level neural distance matrix for the  
1303 four test locations (defined by objective location) <sup>77-79</sup>, which was then subjected to  
1304 multidimensional scaling and the Procrustes analysis. We performed a nonparametric  
1305 permutation test as follows. First, we obtained the actual Procrustes distance calculated from  
1306 the group-level neural distance matrix. Procrustes distance indicates the deviation of the  
1307 reconstructed neural space from the original physical space. Second, we applied the  
1308 permutation procedure to obtain the surrogate distribution of Procrustes distance, to which  
1309 the actual Procrustes distance would be compared. Specifically, in each permutation, we  
1310 randomly shuffled the 12 off-diagonal entries in the grand group-level neural distance matrix.  
1311 Note that to allow for more permutations, this shuffling was done prior to the averaging of  
1312 symmetrical off-diagonal elements in the neural distance matrix. We obtained the Procrustes  
1313 distance by applying multidimensional scaling and the Procrustes analysis to the shuffled  
1314 neural distance matrix. This process was repeated 5000 times, resulting in a surrogate  
1315 distribution of Procrustes distance. Third, the actual Procrustes distance was compared to the



1316 surrogate distribution. The significance level (i.e., p value) was calculated as the proportion  
1317 of values in the surrogate distribution being smaller than the actual Procrustes distance,  
1318 analogous to directional one-sample t test. Results are depicted in Figure 6b.2 & 6c.2.

1319

#### 1320 *Assessing spatial overlap between MVPS and fMRIa at the voxel level*

1321 To assess the spatial overlap between fMRIa and MVPS, we performed a fMRIa-based artificial  
1322 lesion analysis, in which we selectively excluded a certain proportion of voxels based on their  
1323 fMRIa magnitudes (spatially unsmoothed) prior to calculating the spatial information score in  
1324 MVPS<sup>80,81</sup>. Since our previous results showed that in RSC, fMRIa was mainly objective-  
1325 location-driven and MVPS effect was mainly subjective-location-driven, we conducted this  
1326 analysis using objective-location-based fMRIa as estimated from fMRIa-GLM1a and  
1327 subjective-location-based MVPS as calculated from MVPS-GLM1b. We ranked voxels in the  
1328 ROI by the landmark or self-motion fMRIa magnitude (signed) from low to high, using the  
1329 unsmoothed beta images estimated from fMRIa-GLM1a. We conducted the MVPS analysis  
1330 (Figure 5a) with one quarter of voxels excluded at one time. To address the question of  
1331 whether voxels' fMRIa levels affected MVPS, we conducted a repeated-measure ANOVA test,  
1332 with the excluded quarter as the independent variable and the resulted spatial information  
1333 score as the dependent variable.

1334 As a critical comparison, we calculated the empirical chance level of the resulted  
1335 spatial information score, by conducting the same artificial lesion analysis, but with the voxels  
1336 randomized in order instead of being ordered by the fMRIa magnitude. In each randomization,  
1337 we calculated the spatial information score after deleting one quarter of the voxels. Voxel  
1338 randomization was performed for 1000 times, and the mean resulted spatial information  
1339 score averaged across all the randomizations was taken as the empirical chance level. Hence,  
1340 the relative contribution of a certain voxel group can also be assessed by comparing the  
1341 resulted spatial information score to the empirical chance level.

1342 Results are depicted in Figure S7.

1343

#### 1344 *Analysis of empirical relative detection power for fMRI adaptation*

1345 In fMRI data analysis, blood-oxygen-level-dependent (BOLD) signals of certain frequencies are  
1346 attenuated or even eliminated: first, the convolution with the hemodynamic response  
1347 function (HRF) dampens high-frequency signals; second, the high-pass filter eliminates low-

1348 frequency signals. This means that only a proportion of the original BOLD signals will be  
1349 retained in further analysis, which is termed as ‘relative detection power ( $DP_{rel}$ ). Specifically,  
1350  $DP_{rel}$  is calculated as follows<sup>19</sup>,

1351  
1352 
$$DP_{rel} = \frac{var_0}{var_1} \quad (1)$$

1353  
1354 in which  $var_0$  represents the hypothesized neural modulation after HRF convolution and  
1355 high-pass filtering (e.g.,  $f > 1/128$ ), and  $var_1$  represents the original hypothesized neural  
1356 modulation prior to HRF convolution and high-pass filtering.  $DP_{rel}$  ranges from 0 to 1. To  
1357 interpret,  $DP_{rel}$  of one means no loss of detection power, and  $DP_{rel}$  of zero means a  
1358 complete loss. Therefore,  $DP_{rel}$  reflects the probability for us to detect effects in fMRI BOLD  
1359 signals .

1360 In the current study, we used the eight de Bruijn sequences from our previous study<sup>3</sup>.  
1361 These sequences were generated based on objective locations, and hence, were theoretically  
1362 optimized in terms of  $DP_{rel}$  with respect to objective locations. However, in the current study,  
1363 participants’ responses could not be known in advance, leading to the possibility that  $DP_{rel}$   
1364 was reduced for the subjective-location sequences compared to the objective-location  
1365 sequences. Therefore, our observation that fMRI adaptation was predominantly driven by  
1366 objective location rather than subjective location could have been confounded by potentially  
1367 higher  $DP_{rel}$  for the objective-location sequences than the subjective-location sequences.

1368 To address this issue, we calculated the empirical  $DP_{rel}$  for objective-location and  
1369 subjective-location sequences separately, based on the first-level general linear models  
1370 (GLMs) using events and inter-location distances that actually occurred in the experiment for  
1371 each participant. These GLMs included regular regressors modeling the location occupation  
1372 events as a measure of the direct stimulus effect, and parametric regressors modeling the  
1373 inter-location distance as a measure of the adaptation effect, same as in the construction of  
1374 fMRIa-GLM1a and fMRIa-GLM1b in the main analysis.

1375 Specifically, to calculate  $var_1$  in equation (1), we constructed these first-level GLMs with  
1376 no HRF convolution and no high-pass filtering applied. We then converted the simulated BOLD  
1377 signal of the parametric regressor from the time domain to the frequency domain, using the  
1378 fast Fourier transform (FFT). The variance of the hypothesized neural modulation for the

1379 parametric regressor (i.e.,  $var_1$ ) was calculated as the area under curve (AUC) using the  
1380 frequency-domain data.

1381 To calculate  $var_0$  in equation (1), we convolved the predicted fMRI time-series for the  
1382 parametric regressor with the canonical hemodynamic response function (HRF), and adopted  
1383 a high-pass filter with a cut-off at  $1/128s = 0.0078$  Hz. The variance of the convolved and  
1384 filtered signal for the parametric regressor (i.e.,  $var_0$ ) was calculated in the same way as  $var_1$ .  
1385 Finally, to obtain  $DP_{rel}$ , we divided  $var_0$  over  $var_1$ .

1386

1387

1388

1389

1390

1391

1392

1393

1394

1395

1396

1397

1398

1399

1400

1401

1402

1403

1404

1405

1406

1407

1408

1409

1410

1411

## Videos

1412

1413 **Title: Demo of the experimental environments and tasks, related to Figure 1 and the section**  
1414 **‘Stimuli and navigation task’ in STAR Methods.** Demo of the learning trials starts at 0’0” and  
1415 ends at 1’24”. Demo of the location identification task (i.e., test) starts at 1’25”and ends at  
1416 2’48”.

1417

1418 Video file: Learning\_and\_location\_identification\_task\_demo.mp4

## Figures

### Figure 1. Environmental setup, navigation task, and MRI acquisition

- (a) There were two different virtual environments (left): nature (upper panel) and city (lower panel). The two environments shared the same object layout on the linear track (left). There were arrows, four differently colored balls on poles, and a tree on the linear track. The four balls were positioned at the four test locations, i.e., Loc1, Loc2, Loc3, and Loc4. To improve visibility, we used three identical arrows positioned above the ground to denote the same spatial position, meaning that the arrows vertically projected to the same position on the ground and only differed in height. The arrows, the tree, and the floor texture of the linear track had the same physical appearances but in different colors in the two environments. The four balls positioned at the test locations were the same but reversed in order in the two environments. The floor texture outside of the linear track also differed between the two environments. Displayed on the right are snapshots of the two environments, with the background environment, the linear track, the tree, the arrows, and the ball positioned closest to the arrows.
- (b) The time course of the location identification task. Here, the trial is depicted in the nature environment, which was exactly the same in the city environment. Each trial had six phases. In phase 1 'start', the participant was positioned at the starting location, which was randomized trial by trial based on a uniform distribution [-18 m, -4 m] (see Figure 1a, right). In phase 2 'movement', the participant was passively transported to one of the four test locations. In phase 3, after arriving at the test location, the participant's first-person perspective was smoothly turned down to vertically face the ground. In phase 4 'location occupation', the participant's perspective was fixed at the ground for four seconds. In phase 5 'response', participant was required to identify the color of the ball positioned at that location within 20 second. In phase 6 'feedback', feedback was provided, telling the participant whether the response was accurate, and, if incorrect, what the correct answer was. Note that the balls remained invisible throughout the trial, so that participants needed to recall from memory the color of the ball associated with the test location. In the landmark condition, the arrows were invisible, the tree was displayed, and the floor of linear track remained blank. In the self-motion condition, the arrows were displayed, the tree was invisible, and the texture of the linear track was displayed. In both conditions, the background environment only appeared briefly at the beginning of the trial (= 0.7s), and disappeared once the passive movement started. The fMRI analyses focused on the 4-second location occupation period (i.e., phase 4), when the visual inputs were the same for both cue conditions.
- (c) Participants were familiarized with the virtual environments and trained in the location identification task on the first day (Pre-scan day). On the following two days (MRI\_day1 & MRI\_day2), they completed the location identification task while undergoing MRI scanning in the 7T scanner.
- (d) MRI scanning and regions of interest. For an exemplary participant, the functional scan (in green), the T2-weighted structural scan (in blue), the anatomical mask of retrosplenial cortex (RSC; in red), and the anatomical mask of hippocampus (in violet) were overlaid on the brain extracted from the T1-weighted structural scan.

For full details of the virtual environments and the experimental tasks, see STAR Methods and the video.

(a) Virtual environment and object layout

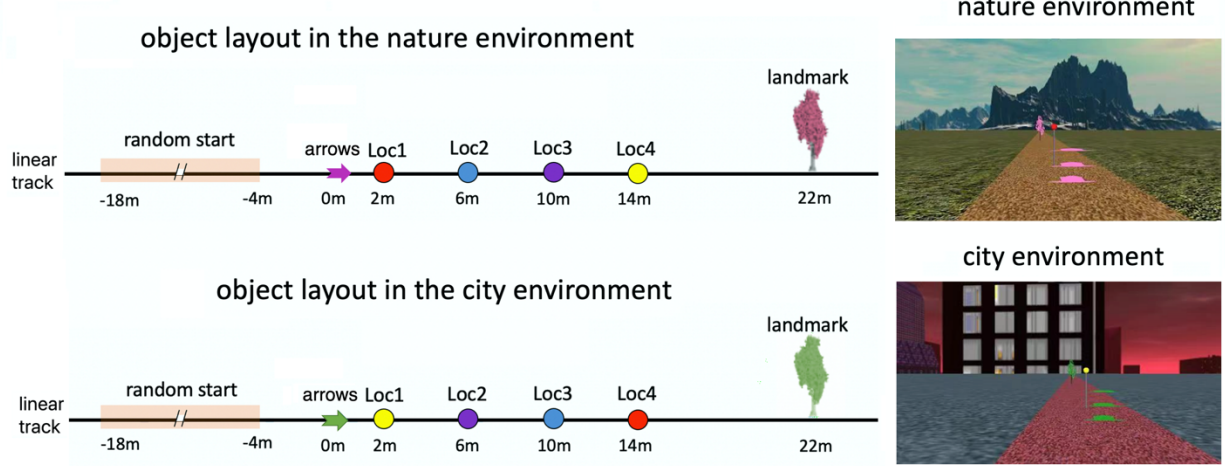

(b) Location identification task, trial time course

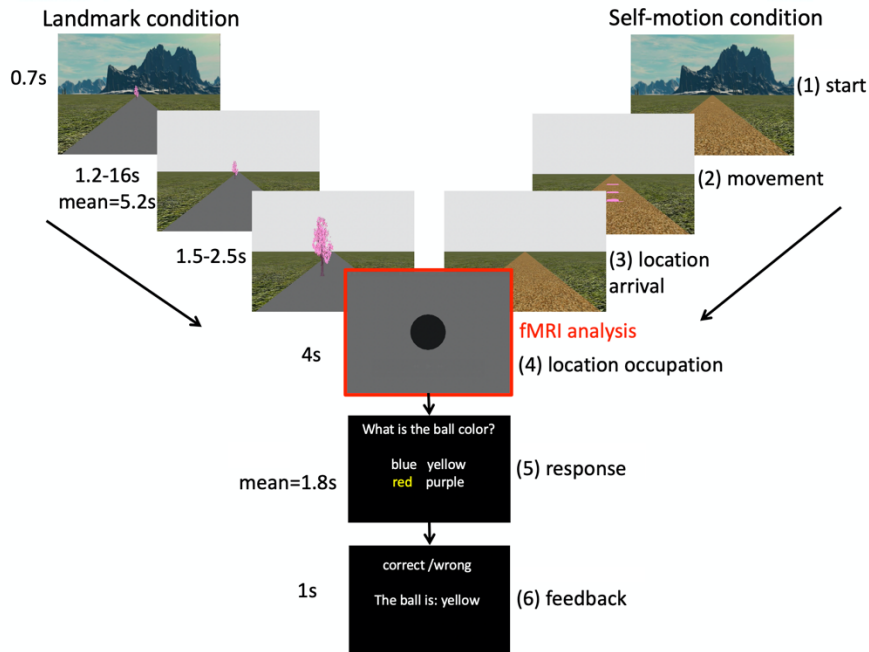

(c) Procedure

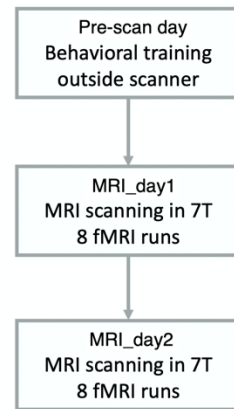

(d) MRI acquisition and main ROIs

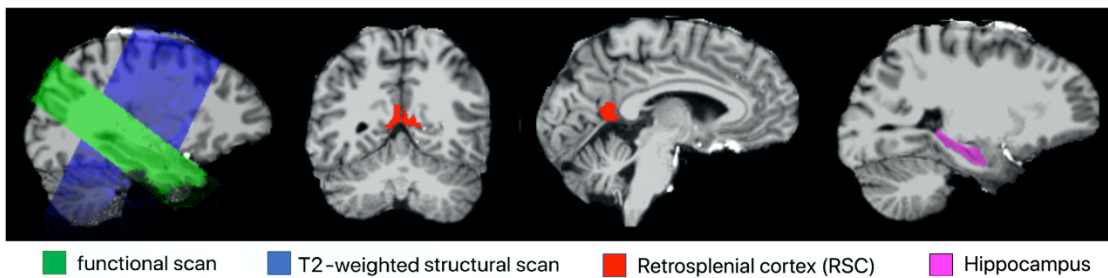

**Figure 2. Behavioral results.**

- (a) Behavioral accuracy is plotted as a function of test location and cue type in each scanning day. Error bars represent  $\pm$  S.E.
- (b) Behavioral confusion matrix. Columns represent the objective locations (i.e., where the participant was actually located), whereas rows represent the subjective locations (i.e., where the participant reported he/she was located). Each cell represents the proportion of trials falling into the category.
- (c) Disentangling representational precision and response bias via modeling.
  - (c.1) Graphic illustration of the estimated underlying representations and response criteria.
  - (c.2) Estimated representational uncertainty (i.e., standard deviations of the Gaussian distributions in (c.1)) is plotted as a function of location and cue type. Error bars represent 95% confidence intervals obtained through a bootstrapping procedure. We further found that the interaction effect between cue type and the linear trend of test location on representational uncertainty was significant (i.e., the 95% confidence interval of the interaction effect did not contain zero).
  - (c.3) Lapse rate was significantly higher than zero in both the landmark condition and the self-motion condition (i.e., the 95% confidence intervals did not contain zero), indicating that participants failed to pay adequate attention to the task occasionally. The difference in lapse rate was not significant between the two cue types. Error bars represent 95% confidence intervals obtained through a bootstrapping procedure.
  - (c.4) Goodness-of-fit of the model. Regarding the behavioral confusion matrices, the observed values in the observed matrices are plotted against the simulated values generated by the model using the optimal values of the parameters as depicted in (c.1), separately for landmarks and self-motion cues, and separately for correct and incorrect trials. The linear regression line,  $R^2$  (i.e., goodness-of-fit), and the regression equation are displayed in each scatterplot. Additionally, goodness-of-fit remained at a very high level when all data points were analyzed together ( $R^2 = 0.9997$ ).

See more details of the analyses in STAR Methods.

(a) Behavioral accuracy

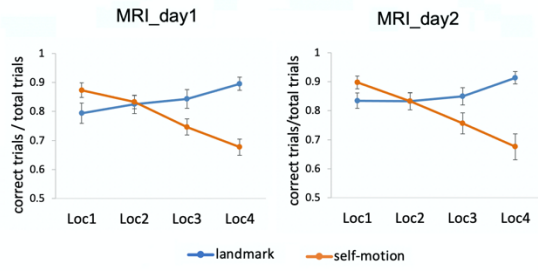

(b) Behavioral confusion matrix

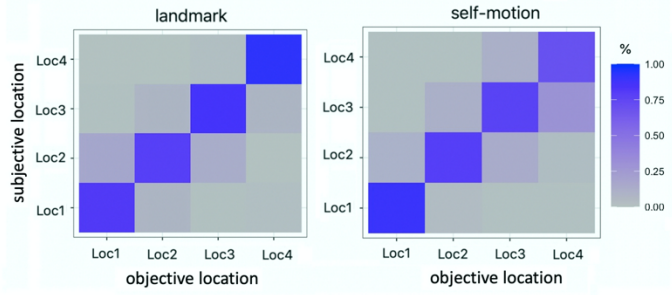

(c) Modeling results

(c.1) Graphic illustration of representational uncertainties and response criterions

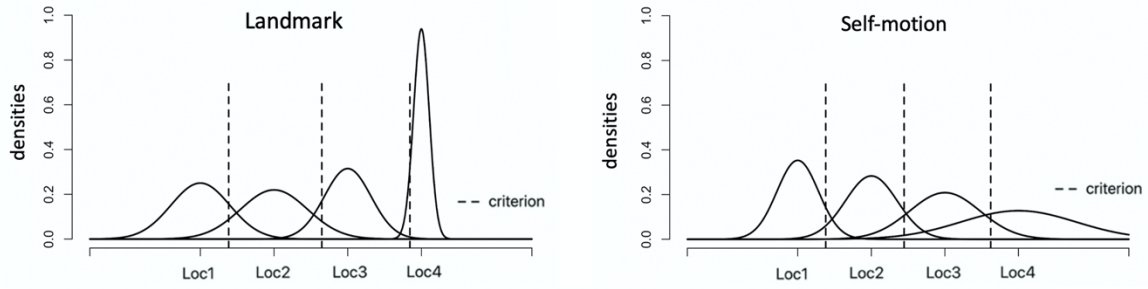

(c.2) Representational uncertainty

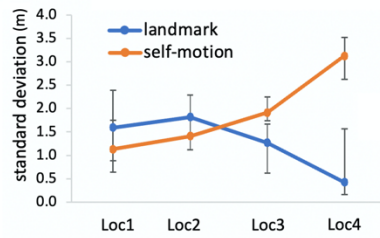

(c.3) Lapse rate

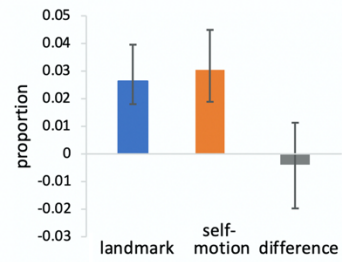

(c.4) Goodness of fit

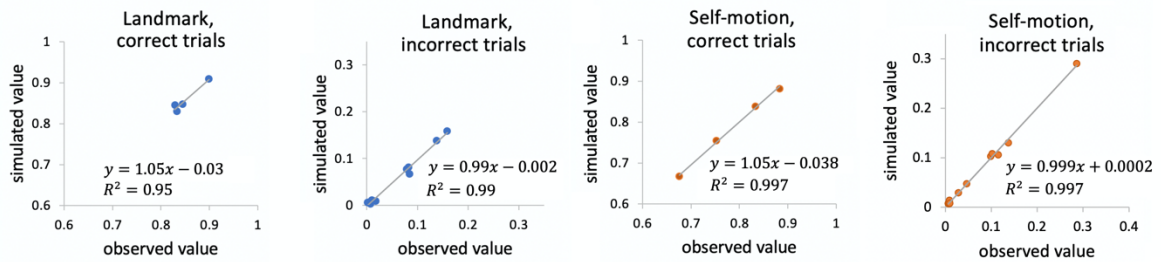



**Figure 3. Univariate analysis of fMRIa in retrosplenial cortex.**

(a) Beta estimate of fMRIa is plotted as a function of location type (objective vs. subjective location), cue type (landmark vs. self-motion), and scanning day (MRI\_day1 vs. MRI\_day2). We conducted statistical tests on the mean fMRIa averaged across scanning days and environments (green bars). The displayed significance results were corrected for multiple comparisons of the four tests, using the permutation-based Holm-Bonferroni procedure.

(b) Unique contributions of objective location ('objective-unique') and subjective location ('subjective-unique') to fMRIa. Results of the landmark condition and the self-motion condition are plotted separately. Significance levels displayed in the brackets refer to results when participants with behavioral accuracy > 90% were excluded from the analysis.

(c) Beta estimate of RSC activation is plotted as a function of inter-location distance defined by objective locations for each cue type.

See more details of the analysis in STAR Methods.

n.s. denotes  $p_{1\text{-tailed}} > 0.1$ , \* denotes  $p_{1\text{-tailed}} < 0.05$ , and \*\* denotes  $p_{1\text{-tailed}} < 0.01$ ; + denotes  $p_{1\text{-tailed}} < 0.1$ .

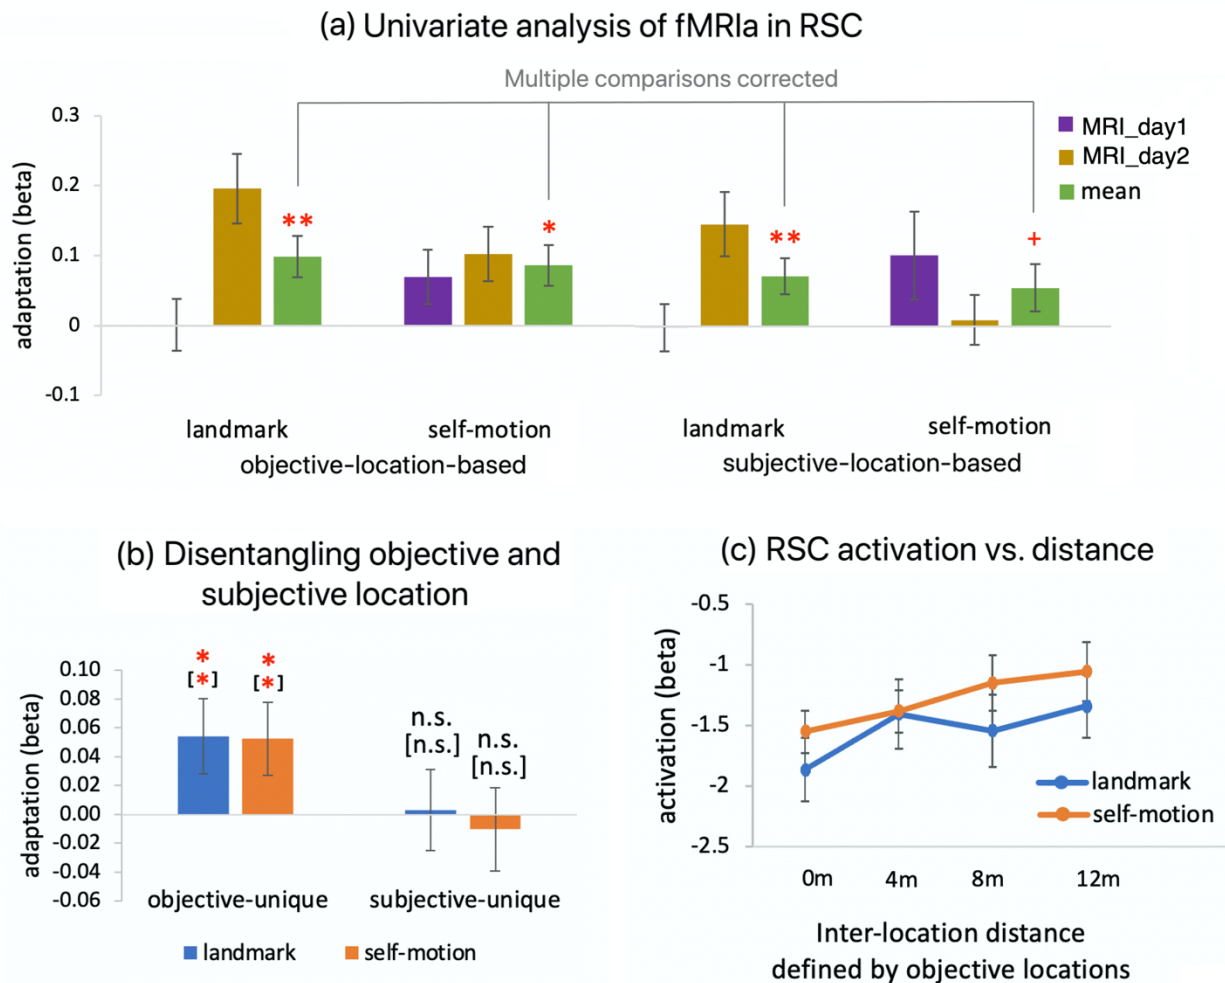

**Figure 4. fMRIa pattern similarity analysis in retrosplenial cortex.**

- (a) Setup of the fMRIa pattern similarity analysis. First, runs were ordered chronologically for each cue type. Odd-numbered runs belonged to the nature environment, and even-numbered runs belonged to the city environment. Second, to minimize any subtle influences of environment, for each cue type, the fMRIa vectors estimated from the two adjacent runs from the two different environments were averaged to obtain the mean fMRIa vectors; that is, for each cue type, the fMRIa vectors from an odd-numbered run and the subsequent even-numbered run were averaged (e.g., 1<sup>st</sup> run and 2<sup>nd</sup> run were averaged, 3<sup>rd</sup> run and 4<sup>th</sup> run were averaged, etc.). In particular,  $R_{i,i+1}$  refers to the mean fMRIa vector averaged from the  $i^{\text{th}}$  run (nature) and the  $(i+1)^{\text{th}}$  run (city). Next, all the mean fMRIa vectors were paired up to one another, resulting in  $3 \times 3 = 9$  different types of pairing: cue type (within-landmark vs. within-motion vs. between-cue)  $\times$  day type (within-day1 vs. within-day2 vs. between-days).
- (b) Results of the fMRIa pattern similarity analysis. Objective-location-based fMRIa pattern similarity is plotted as a function of cue type and day.
- See more details of the analysis in STAR Methods.
- n.s. denotes  $p_{1\text{-tailed}/2\text{-tailed}} > 0.1$ , \* denotes  $p_{1\text{-tailed}/2\text{-tailed}} < 0.05$ , and \*\* denotes  $p_{1\text{-tailed}/2\text{-tailed}} < 0.01$ ; + denotes  $p_{1\text{-tailed}/2\text{-tailed}} < 0.1$ .

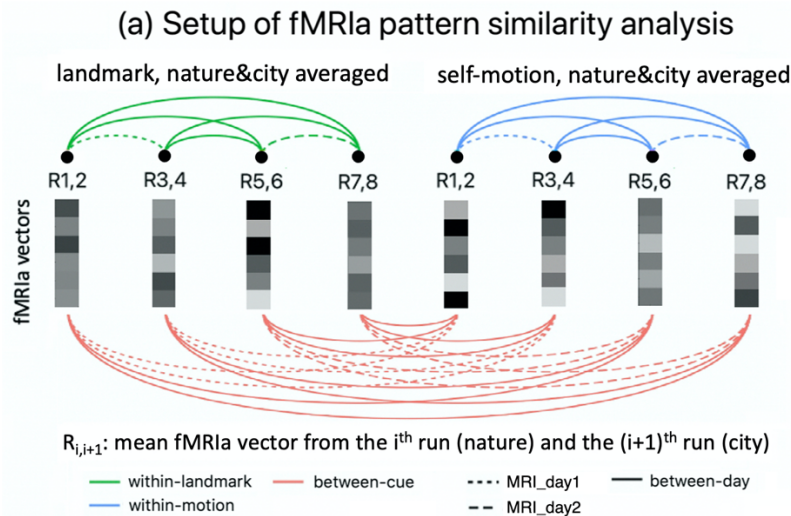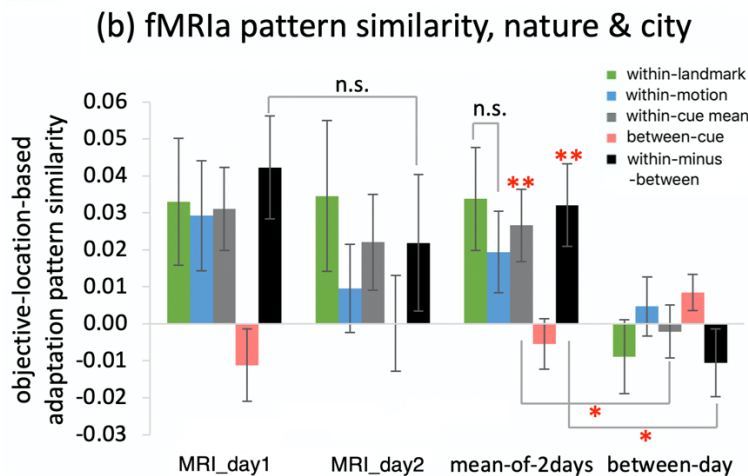

**Figure 5. MVPS analysis in retrosplenial cortex.**

- (c) Setup of the MVPS analysis. (a.1) Pairing of the runs. Similar to the fMRIa pattern similarity analysis (Figure 4a), runs were ordered chronologically for each cue type. Odd-numbered runs belonged to the nature environment, and even-numbered runs belonged to the city environment. To minimize any subtle influences of environment, for each cue type, the activation vectors estimated from the two adjacent runs from the two different environments were averaged location by location. (a.2) For each link in (a.1), there are four different mean activation vectors corresponding to the four test locations (i.e., Loc1, Loc2, Loc3, Loc4) in each of the two nodes (i.e.,  $R_{i,(i+1)}$  and  $R_{m,(m+1)}$ , in which the subscripts 'i' and 'm' denote any odd numbers from 1 to 7). In (a.2), calculating the representational similarities between pairwise locations resulted in the 4x4 activation pattern similarity matrix for the link. (a.3) We obtained the 4x4 mean activation pattern similarity matrix by averaging all the similarity matrices across all links in (a.1). Inter-location distances could be defined by either objective or subjective locations. The spatial information score was calculated as the Pearson R correlation between the mean activation pattern similarity matrix and the inter-location distance matrix (Fisher-transformed and reversed in sign).
- (d) Spatial information score is plotted as a function of cue type (landmark vs. self-motion vs. between-cue), location type (objective vs. subjective location), and day type (MRI\_day1 vs. MRI\_day2). The lumped spatial information score was calculated regardless of day type (yellow bars). Displayed significance results were corrected for multiple comparisons across the six tests on the lumped spatial information score (yellow bars), using the permutation-based Holm-Bonferroni procedure (STAR Methods).
- (e) Unique contributions of objective and subjective locations were disentangled in MVPS calculations. Significance levels displayed in the brackets refer to results when participants with behavioral accuracy > 90% were excluded from analysis.
- (f) To visualize MVPS, activation pattern similarity is plotted as a function of inter-location distance defined by subjective locations for landmarks, self-motion cues, and between cue types.

See more details of the analysis in STAR Methods.

\* denotes  $p_{1\text{-tailed}/2\text{-tailed}} < 0.05$ , and \*\* denotes  $p_{1\text{-tailed}/2\text{-tailed}} < 0.01$ ; + denotes  $p_{1\text{-tailed}/2\text{-tailed}} < 0.1$ .

(a.1) Setup of MVPS analysis

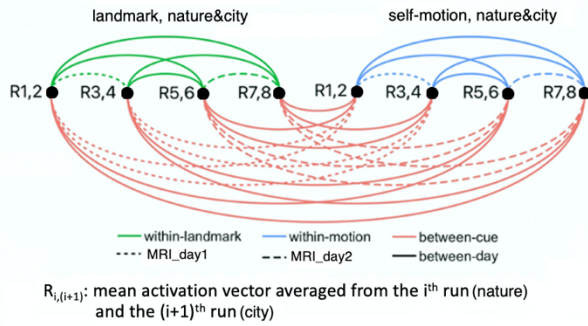

(a.2) Pairing of locations for each link in (a.1)

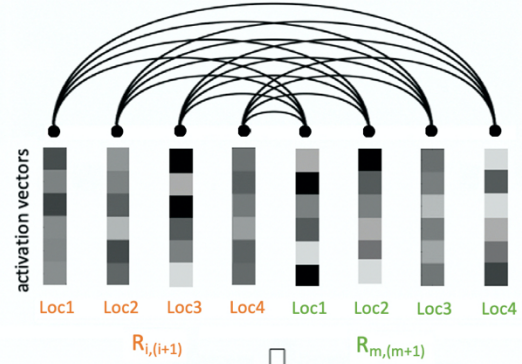

(a.3) Calculation of spatial information

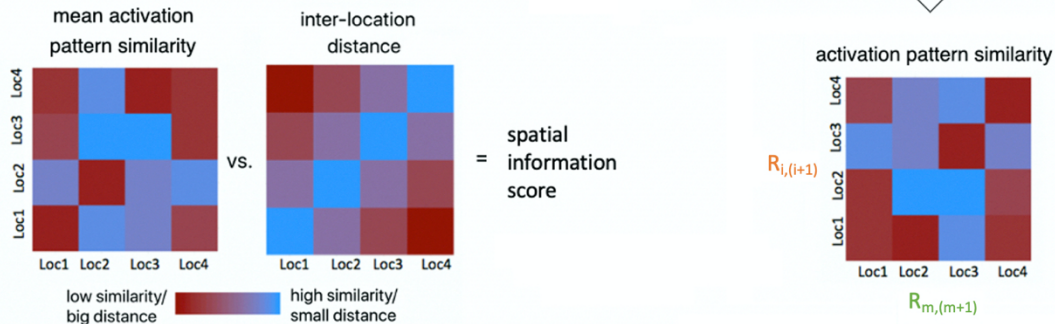

(b) MVPS

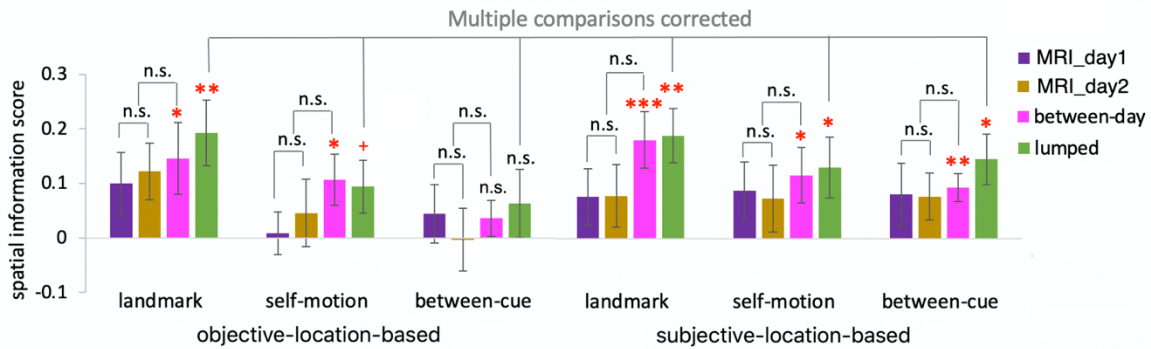

(c) Disentangling objective and subjective locations in MVPS

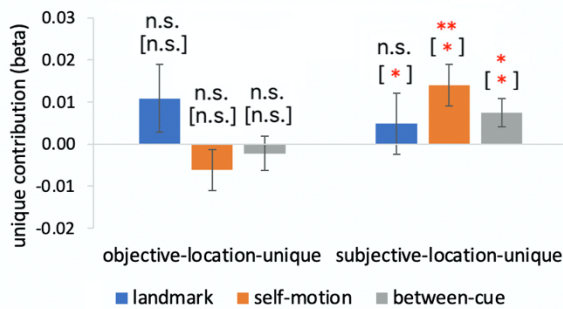

(d) Activation pattern similarity vs. distance

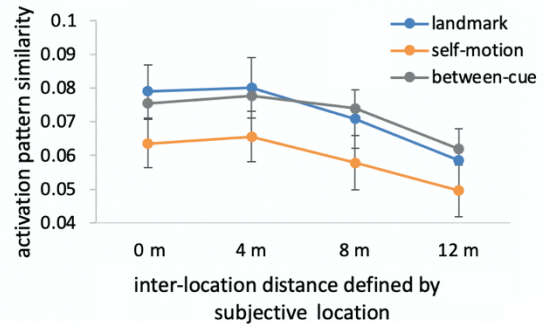

**Figure 6. Neural space reconstruction analysis in retrosplenial cortex.**

- (a) Setup of the analysis. For both fMRIa and MVPS, first a 4X4 neural distance matrix was constructed, with the elements denoting pairwise neural distances among the four test locations (defined by objective location). Next, this matrix was normalized, so all the elements were within the range [0, 1], and the four on-diagonal elements were manually set to 0 (dark cells). Third, the normalized neural distance matrix was submitted to the multi-dimensional scaling and then Procrustes analysis to obtain the reconstructed space. See STAR Methods for more details.
- (b) Results based on fMRIa. (b.1) The pattern of the reconstructed space did not resemble the observed behavioral pattern (Figure 2). The reconstructed distance between adjacent locations is plotted as a function of location pair and cue type, and the interaction between the linear trend of location pair and cue type was not significant. (b.2) Nonparametric permutation tests based on the grand group-level neural distance matrix revealed that the recovered neural space significantly resembled the original physical space for self-motion cues, but not landmarks (STAR Methods).
- (c) Results based on MVPS. (c.1) The structure of the reconstructed space resembled the observed behavioral pattern (Figure 2). The reconstructed distance between adjacent locations is plotted as a function of location pair and cue type, and the interaction between the linear trend of location pair and cue type was significant. (c.2) Nonparametric permutation tests based on the grand neural distance matrix revealed that the recovered neural space did not significantly resemble the original physical space for either cue type.
- See more details of the analysis in STAR Methods.

(a) Setup of neural space reconstruction analysis

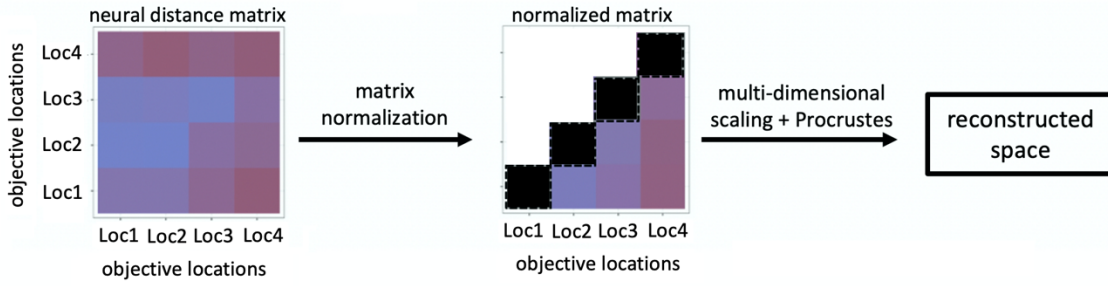

(b) fMRIa-based space reconstruction

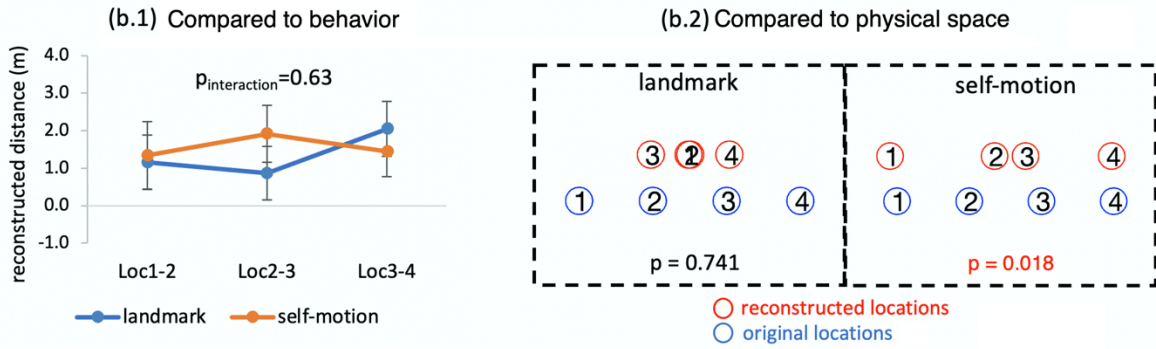

(c) MVPS-based space reconstruction

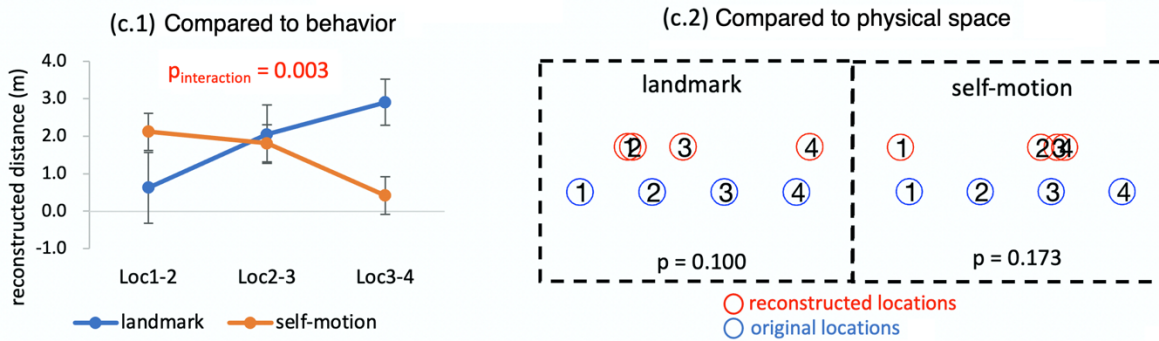

## Tables

**Table 1. Statistical results for univariate fMRI adaptation and multi-voxel pattern similarity analyses.** In correspondence to Figure 3a&b on fMRI adaptation (fMRIa) and Figure 5b&c on multi-voxel pattern similarity (MVPS). In paratheses are results with statistical outliers excluded from the analysis. df: degree of freedom; N/A: not applicable;  $BF_{10}$ : Bayes factor, relative likelihood of the alternative hypothesis over the null hypothesis.

| cue condition                               |             | t                | df         | p <sub>1-tailed</sub> | p <sub>corrected</sub> | Cohen's d        | BF <sub>10</sub>  |
|---------------------------------------------|-------------|------------------|------------|-----------------------|------------------------|------------------|-------------------|
| <b>univariate fMRIa</b>                     |             |                  |            |                       |                        |                  |                   |
| objective-location-based                    | landmark    | 3.356            | 19         | 0.002                 | 0.005                  | 0.750            | 26.000            |
|                                             | self-motion | 2.940            | 19         | 0.004                 | 0.012                  | 0.657            | 11.768            |
| subjective-location-based                   | landmark    | 2.807            | 19         | 0.006                 | 0.010                  | 0.602            | 9.208             |
|                                             | self-motion | 1.635            | 19         | 0.059                 | 0.061                  | 0.366            | 1.345             |
| objective-location-unique                   | landmark    | 2.093            | 19         | 0.025                 | N/A                    | 0.468            | 2.694             |
|                                             | self-motion | 1.860            | 19         | 0.039                 | N/A                    | 0.416            | 1.871             |
| subjective-location-unique                  | landmark    | 0.117            | 19         | 0.454                 | N/A                    | 0.026            | 0.254             |
|                                             | self-motion | -0.354           | 19         | 0.636                 | N/A                    | -0.079           | 0.182             |
| objective-location-unique (accuracy <0.9)   | landmark    | 2.699<br>(3.302) | 12<br>(11) | 0.010<br>(0.004)      | N/A<br>(N/A)           | 0.749<br>(0.953) | 6.699<br>(15.637) |
|                                             | self-motion | 1.983            | 16         | 0.032                 | N/A                    | 0.481            | 2.312             |
| subjective-location-unique (accuracy < 0.9) | landmark    | -0.165           | 12         | 0.564                 | N/A                    | -0.046           | 0.248             |
|                                             | self-motion | -0.546           | 16         | 0.704                 | N/A                    | -0.132           | 0.174             |
| <b>MVPS (spatial information score)</b>     |             |                  |            |                       |                        |                  |                   |
| objective-location-based                    | landmark    | 3.207<br>(3.311) | 19<br>(18) | 0.003<br>(0.002)      | 0.010<br>(0.009)       | 0.717<br>(0.76)  | 19.486<br>(22.95) |
|                                             | self-motion | 1.938            | 19         | 0.034                 | 0.067                  | 0.433            | 2.109             |
|                                             | between-cue | 1.014            | 19         | 0.162                 | 0.159                  | 0.227            | 0.604             |
| subjective-location-based                   | landmark    | 3.795<br>(3.991) | 19<br>(18) | 0.001<br>(0.0004)     | 0.002<br>(0.003)       | 0.849<br>(0.916) | 61.372<br>(84.54) |
|                                             | self-motion | 2.319            | 19         | 0.016                 | 0.046                  | 0.519            | 3.905             |
|                                             | between-cue | 3.143            | 19         | 0.003                 | 0.010                  | 0.703            | 17.248            |
| objective-location-unique                   | landmark    | 1.343            | 19         | 0.097                 | N/A                    | 0.300            | 0.904             |
|                                             | self-motion | -1.274           | 19         | 0.891                 | N/A                    | -0.285           | 0.114             |
|                                             | between-cue | -0.546           | 19         | 0.704                 | N/A                    | -0.122           | 0.162             |
| subjective-location-unique                  | landmark    | 0.674            | 19         | 0.254                 | N/A                    | 0.151            | 0.419             |
|                                             | self-motion | 2.806            | 19         | 0.006                 | N/A                    | 0.627            | 9.198             |
|                                             | between-cue | 2.220            | 19         | 0.019                 | N/A                    | 0.496            | 3.313             |
| objective-location-unique (accuracy < 0.9)  | landmark    | 1.077            | 12         | 0.151                 | N/A                    | 0.298            | 0.754             |
|                                             | self-motion | -0.485           | 12         | 0.683                 | N/A                    | -0.118           | 0.181             |
|                                             | between-cue | -0.678           | 12         | 0.746                 | N/A                    | -0.164           | 0.162             |
| subjective-location-unique (accuracy < 0.9) | landmark    | 2.207            | 12         | 0.024                 | N/A                    | 0.612            | 3.249             |
|                                             | self-motion | 2.052            | 12         | 0.028                 | N/A                    | 0.498            | 2.566             |
|                                             | between-cue | 2.260            | 12         | 0.019                 | N/A                    | 0.548            | 3.546             |

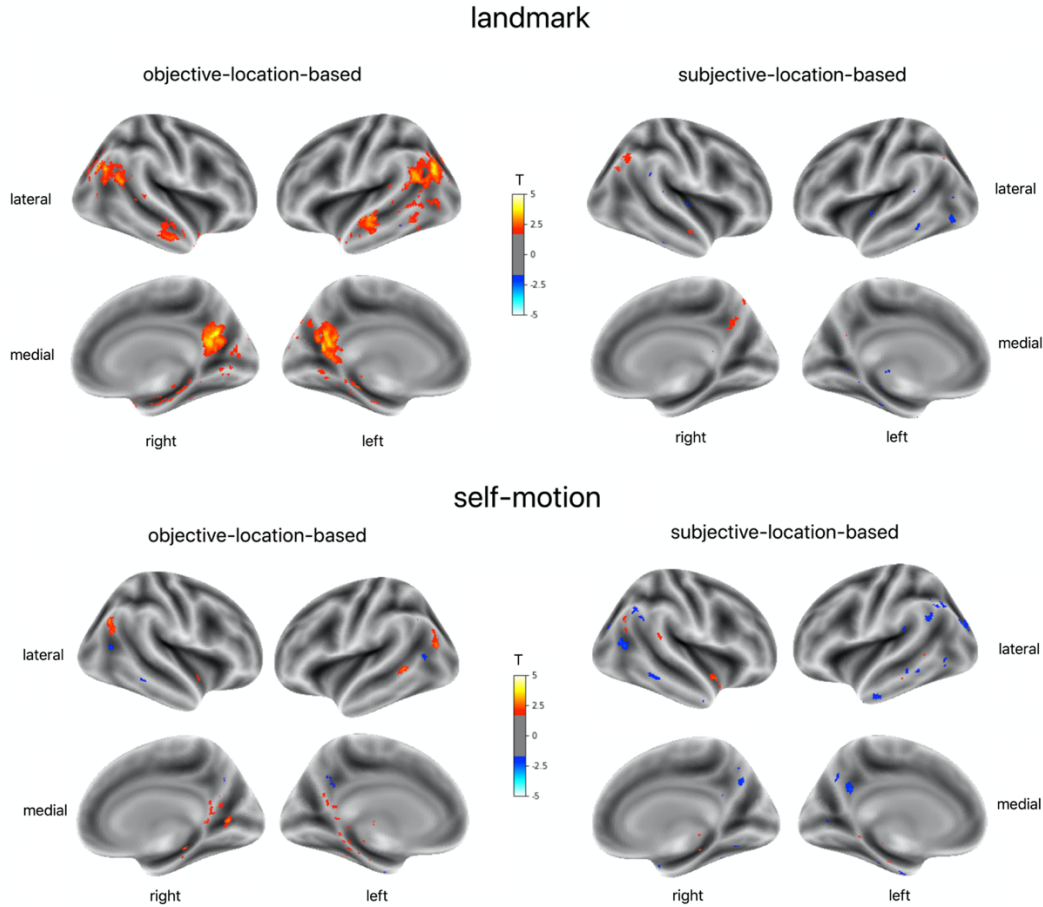

**Figure S1. Voxel-wise analysis of fMRIa in the entire volume, related to Figure 3.** Results are displayed for the landmark condition (upper) and the self-motion condition (lower), objective-location-based fMRIa (left) and subjective-location-based fMRIa (right). The parametric regressors modeled same vs. different locations in the landmark condition, and continuous inter-location distance in the self-motion condition, as in the main analyses (Figure 3). The participant-specific maps of fMRIa were normalized to the MNI template and spatially smoothed with 3mm isotropic FWHM. For the 2<sup>nd</sup> level analysis, we conducted directional one-sample t test against 0. The parametric t maps were overlaid on the MNI template and projected to the brain surface. Here, results are thresholded at  $p_{\text{uncorrected}} = 0.05$ .

When corrected for multiple comparisons across the entire volume using the nonparametric permutation test (Nichols & Holmes, 2002), there were no significant voxels with the voxel-inference approach. When the cluster-inference approach (voxel-wise  $t > 3$ ) was adopted, in the landmark objective location condition, there were three significant clusters ( $p_{\text{FWE-corr}} < 0.05$ , 1-tailed), encompassing the angular gyrus (MNI coordinates of local maxima: [50, -71, 30], [-45, -71, 28]), middle occipital gyrus (MNI coordinates of local maxima: [40, -79, 35], [45, -77, 27], [-34, -84, 33]), calcarine (MNI coordinates of local maxima: [3, -56, 12], [-12, -46, 7]), and precuneus (MNI coordinates of local maxima: [1, -63, 24]). In the other conditions, no significant clusters were detected.



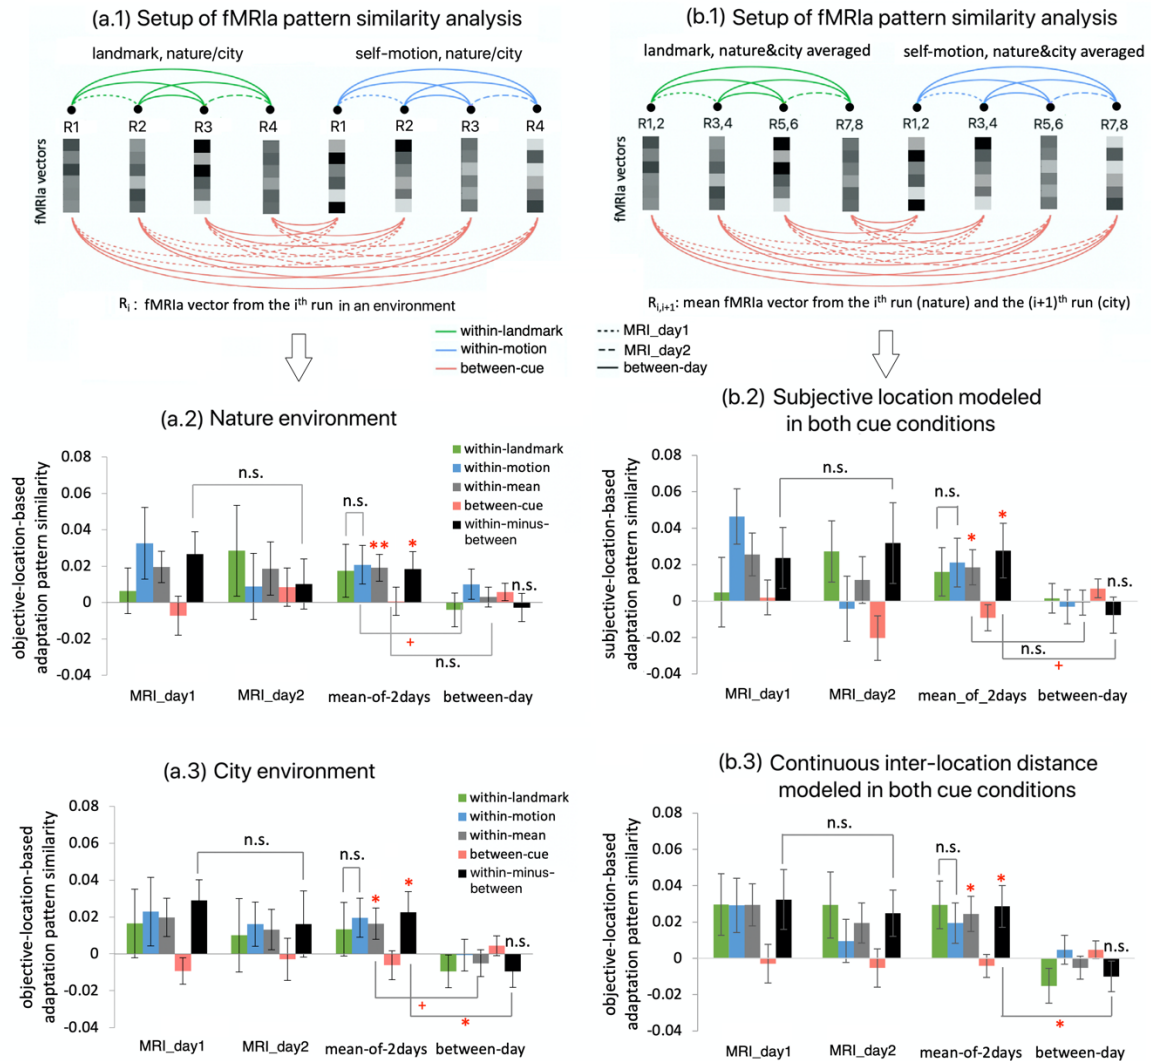

**Figure S2. Controlled analyses of fMRIa pattern similarity in retrosplenial cortex, related to Figure 4 and the main text section ‘fMRIa-based distance coding was spatially distinct between cue types in RSC’.** (a) Separate analyses of objective-location-based fMRIa pattern similarity in the nature environment (a.2) and the city environment (a.3), with inter-location distance modeled continuously in the self-motion condition and ‘same vs. different locations’ modeled in the landmark condition, as in the main analysis (Figure 4). (a.1) Setup of the analyses is the same as in the main analysis (Figure 4a), except that fMRIa vectors were not averaged across different environments.

(b) More controlled analyses. (b.2) Controlled analysis on subjective-location-based pattern similarity, with inter-location distance modeled continuously in the self-motion condition and ‘same vs. different locations’ modeled in the landmark condition, as in the main analysis (Figure 4). (b.3) Controlled analysis on objective-location-based fMRIa pattern similarity with inter-distance modeled continuously in both cue conditions. (b.1) Setup of the analyses is the same as in the main analysis (Figure 4a).

All the controlled analyses revealed a pattern of results similar to the main analysis (Figure 4b).

n.s. denotes  $p_{1\text{-tailed}/2\text{-tailed}} > 0.1$ ; + denotes  $p_{1\text{-tailed}/2\text{-tailed}} < 0.1$ ; \* denotes  $p_{1\text{-tailed}/2\text{-tailed}} < 0.05$ ; \*\* denotes  $p_{1\text{-tailed}/2\text{-tailed}} < 0.01$ . Error bars represent  $\pm$  S.E..

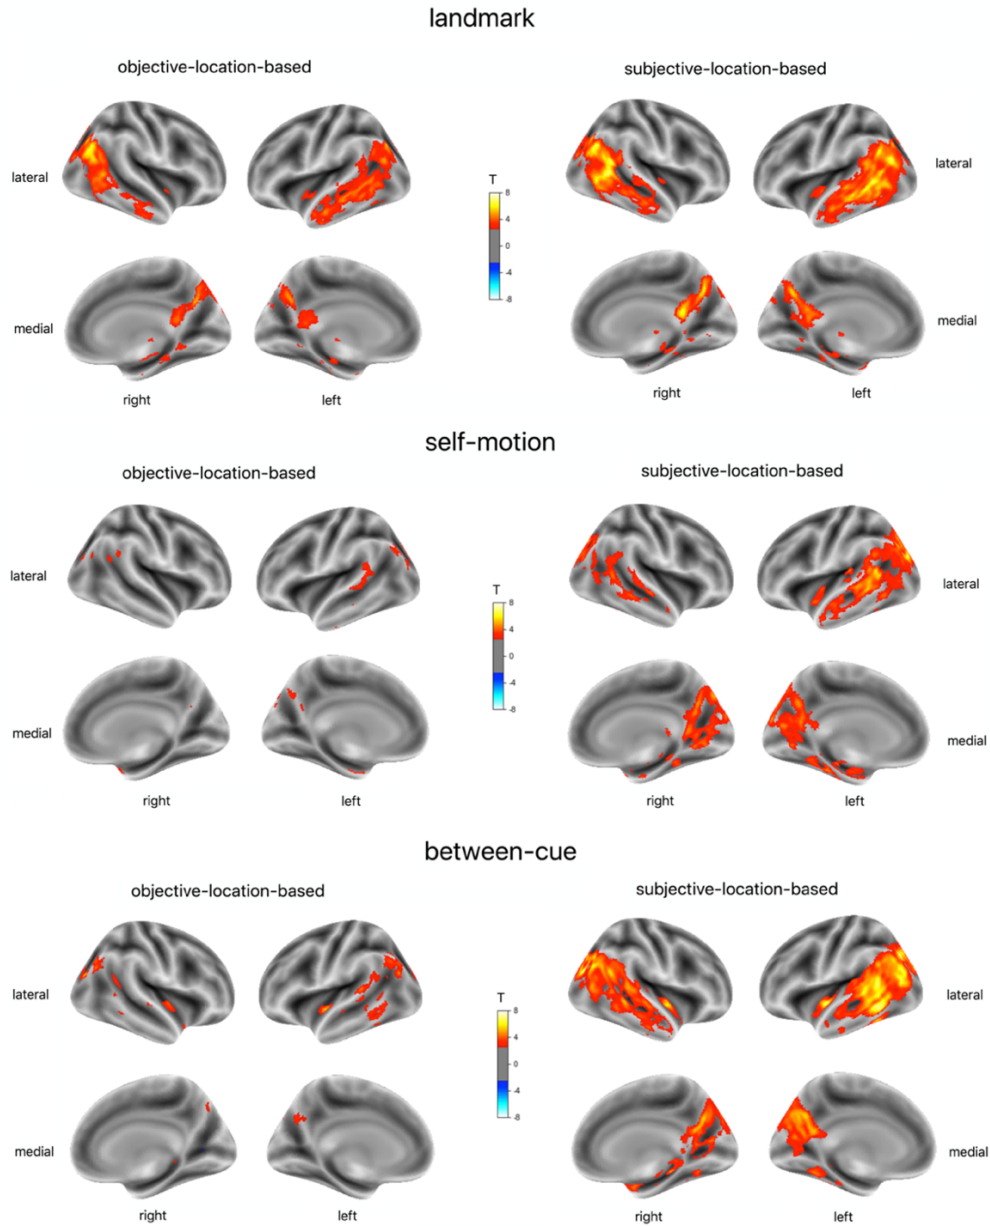

**Figure S3. Searchlight analysis of MVPS in the entire volume, related to Figure 5.** Results are displayed for the landmark condition (upper), self-motion condition (middle), and between cue types (lower), and for objective-location-based MVPS (left), and subjective-location-based MVPS (right). In all situations, the inter-location distance was modeled continuously, with distances of 0m, 4m, 8m, and 12m, as in the main analysis (Figure 5). The searchlight analysis was conducted in each participant’s native brain, using codes adapted from the TDT toolbox (Hebart et al., 2015) and a searchlight radius of 6mm. At each step, for voxels within the searchlight, the spatial information score was calculated, using the same procedure shown in Figure 5a; the score was then assigned to the voxel at the center of the searchlight. The participant-specific brain maps of spatial information score were normalized to the MNI template and spatially smoothed with 3mm isotropic FWHM. For the 2<sup>nd</sup> level analysis, we conducted directional one-sample t test against 0. Here, the parametric t maps were overlaid on the MNI template and projected to the brain surface. Results are thresholded at  $p_{\text{uncorrected}} < 0.01$ . Detailed results are listed in Table S2.

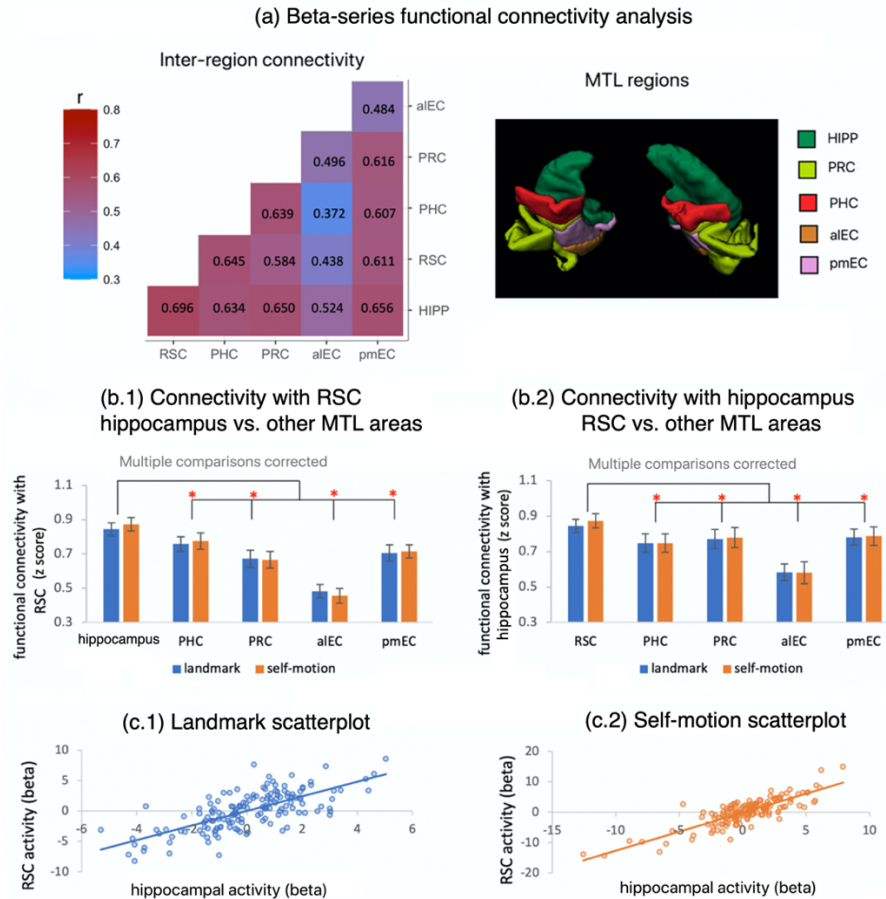

**Figure S4. Functional connectivity between retrosplenial cortex and hippocampus, related to the main text section ‘Hippocampus contained a spatial coding scheme similar to RSC’.** (a) Results of the beta-series functional connectivity analysis. Displayed on the left is the mean pairwise simple correlations among RSC and the medial temporal lobe (MTL) regions. Displayed on the right are anatomical masks of MTL regions for an exemplary participant. We assessed the functional connectivity between these regions using the beta-series connectivity analysis (Cisler et al., 2014), using MVPS-GLM2 that modeled individual trials with separate regressors (STAR Methods). For each brain region, we obtained a temporal sequence of activation estimates concatenated across individual trials, which were mean-centered within each run prior to the trial concatenation. We then calculated pairwise Pearson  $r$  correlations (fisher-transformed) between the temporal sequences of these regions for each participant. There existed strong functional coupling between RSC and hippocampus in both the landmark condition ( $p_{2\text{-tailed}} < 0.001$ ,  $BF_{10} > 1000$ ) and the self-motion condition ( $p_{2\text{-tailed}} < 0.001$ ,  $BF_{10} > 1000$ ).

(b.1) The five pairs differed significantly in connectivity ( $F(4,76) = 36.079$ ,  $p < 0.001$ ,  $\eta_p^2 = 0.655$ ). Planned comparisons showed that RSC-hippocampus connectivity was significantly stronger than RSC’s connectivity with other MTL regions. (b.2) The five pairs differed significantly in connectivity ( $F(4,76) = 15.549$ ,  $p < 0.001$ ,  $\eta_p^2 = 0.450$ ). Planned comparisons showed that RSC-hippocampus connectivity was significantly stronger than the hippocampus’s connectivity with other MTL regions. Effects involving cue type were not significant. \* denotes  $p_{\text{holm},2\text{-tailed}} < 0.05$ .

(c) Scatterplot of trial-by-trial activation of the hippocampus and RSC in the landmark condition (c.1) and the self-motion condition (c.2) in an exemplary participant.

RSC: retrosplenial cortex; HIPP: hippocampus; PHC: parahippocampal cortex; PRC: perirhinal cortex; aIEC: anterior-lateral entorhinal cortex; pmEC: posterior-medial entorhinal cortex.

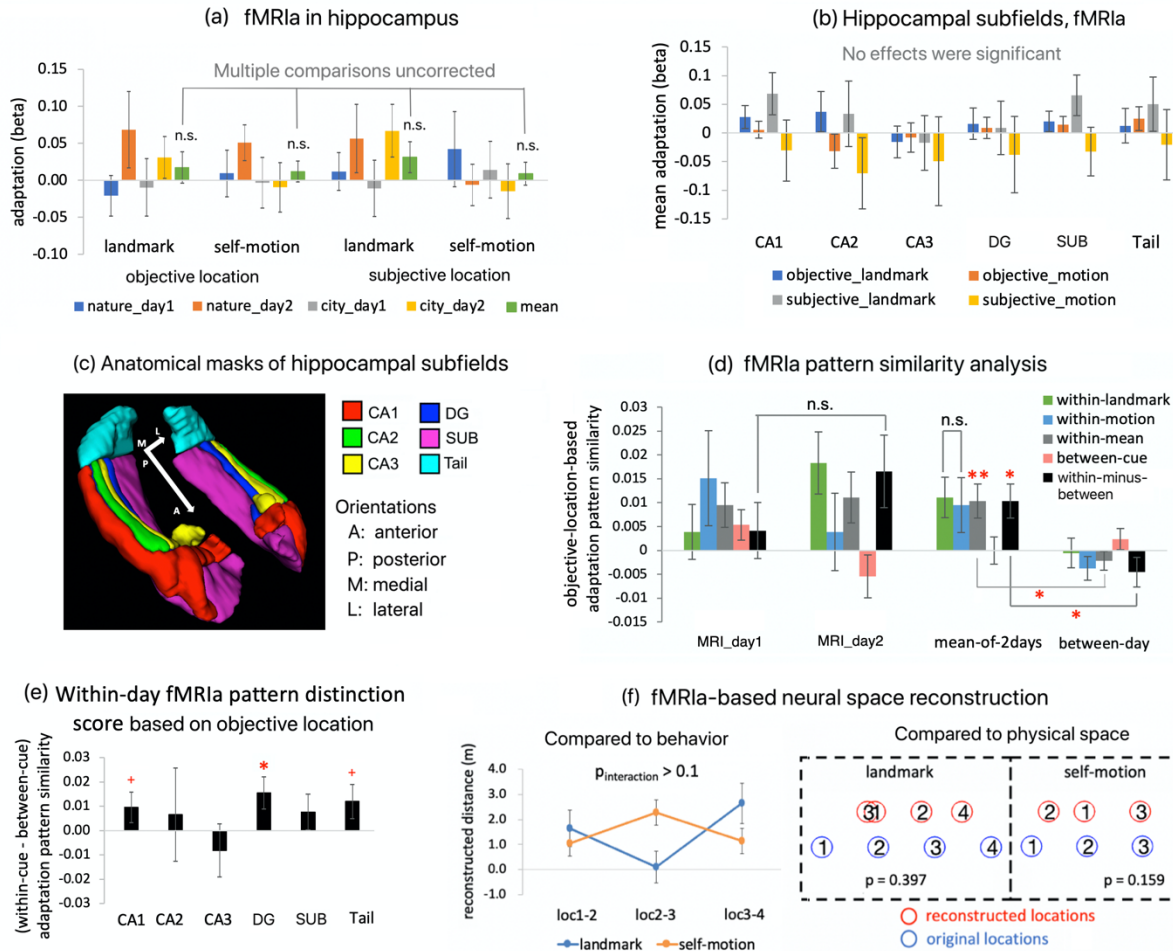

**Figure S5. fMRIa results in hippocampus, related to the section ‘Hippocampus contained a spatial coding scheme similar to RSC’ in the main text and Figure 3&4&6.** (a) The univariate fMRIa analysis that assessed objective-location-based and subjective-location-based fMRIa for landmarks and self-motion cues, displayed separately for different environments and scanning days. The continuous inter-location was modeled for both cue types by default, because a previous study reporting fMRIa-based neural coding of continuous distance between locations defined by landmarks in the hippocampus (Morgan et al., 2011). The mean fMRIa (green bars) was not significant for either cue type, even at the uncorrected significance level. (b) Mean fMRIa averaged across environments and days is displayed for each hippocampal subfield. No significant fMRIa was observed in any subfields. (c) Anatomical masks of hippocampal subfields for an exemplary participant (DG – dentate gyrus; SUB - subiculum). (d) fMRIa pattern similarity analysis based on objective location. Setup of this analysis is identical to Figure 4a. The within-day fMRIa pattern distinction score was significantly positive ( $t(19) = 2.090$ ,  $p_{1\text{-tailed}} = 0.018$ ,  $BF_{10} = 2.682$ ). This implies potential spatial coding in the hippocampus, though fMRIa averaged across voxels was not significant in the hippocampus (a). (e) Within-day fMRIa pattern distinction score for each hippocampal subfield. The score reached statistical significance in the dentate gyrus (DG,  $t(19) = 1.930$ ,  $p_{1\text{-tailed}} = 0.034$ ,  $BF_{10} = 2.082$ ), but not in other subfields ( $p_s > 0.05$ ). (f) Results of the neural space reconstruction analysis based on fMRIa in the hippocampus. The reconstructed neural spaces did not resemble participants’ behavior (left) or the original physical space in any cue conditions (right).

n.s. denotes  $p_{1\text{-tailed}/2\text{-tailed}} > 0.1$ , \* denotes  $p_{1\text{-tailed}/2\text{-tailed}} < 0.05$ , and \*\* denotes  $p_{1\text{-tailed}/2\text{-tailed}} < 0.01$ ; + denotes  $p_{1\text{-tailed}/2\text{-tailed}} < 0.1$ .

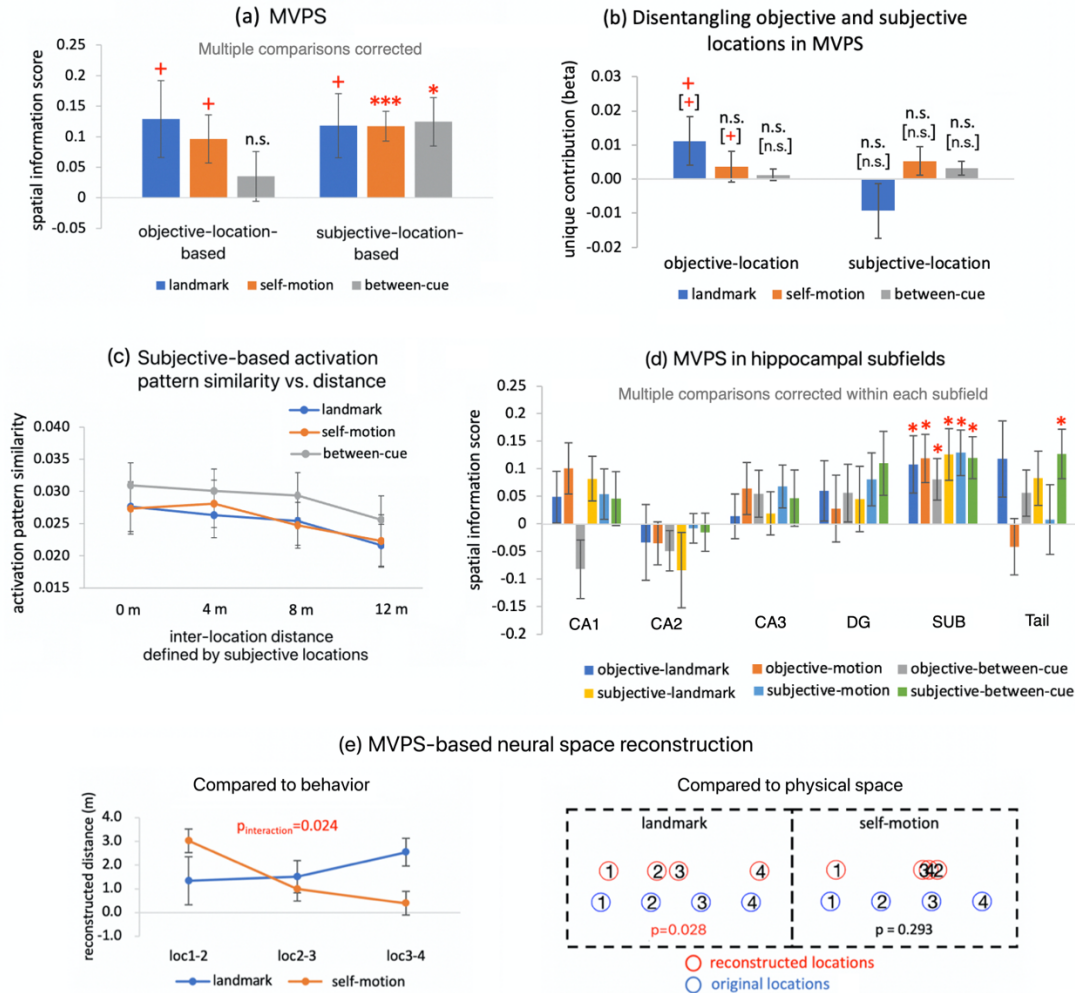

**Figure S6. MVPS results in the hippocampus, related to section ‘Hippocampus contained a spatial coding scheme similar to retrosplenial cortex’ in the main text and to Figure 5&6.** (a) Spatial information score based on objective location and subjective location for landmarks, self-motion cues, and between cue types. The spatial information score was significant or marginally significant for all the three measurements (landmark, self-motion, between-cue) when based on subjective location. (b) Unique contributions of objective location or subjective location were not significant for any cue type or location type (objective vs. subjective). (c) To visualize the MVPS effects, activation pattern similarity is plotted as a function of inter-location distance defined by subjective location for landmarks, self-motion cues, and between cue types. (d) MVPS results in each hippocampal subfield. Statistical results were corrected for multiple comparisons within each subfield using the nonparametric permutation test and the Holm-Bonferroni procedure (STAR Methods). In the subiculum (SUB), spatial information score was significant for all three measurements (landmark, self-motion, and between-cue) and for both location types (objective and subjective location). DG - dentate gyrus. (e) In the hippocampus, the MVPS-based neural spaces significantly resembled the participants’ behavior (i.e., the interaction between cue type and the linear trend of location pair was significant,  $p_{\text{interaction}} = 0.024$ ), resembled the physical space in the landmark condition ( $p = 0.028$ ), but did not resemble the physical space in the self-motion condition ( $p = 0.293$ ).

\* denotes  $p_{1\text{-tailed}} < 0.05$ , and + denotes  $p_{1\text{-tailed}} < 0.1$ , n.s. denotes  $p_{1\text{-tailed}} > 0.1$ , \* denotes  $p_{1\text{-tailed}} < 0.05$ , and \*\* denotes  $p_{1\text{-tailed}} < 0.01$ ; + denotes  $p_{1\text{-tailed}} < 0.1$ .

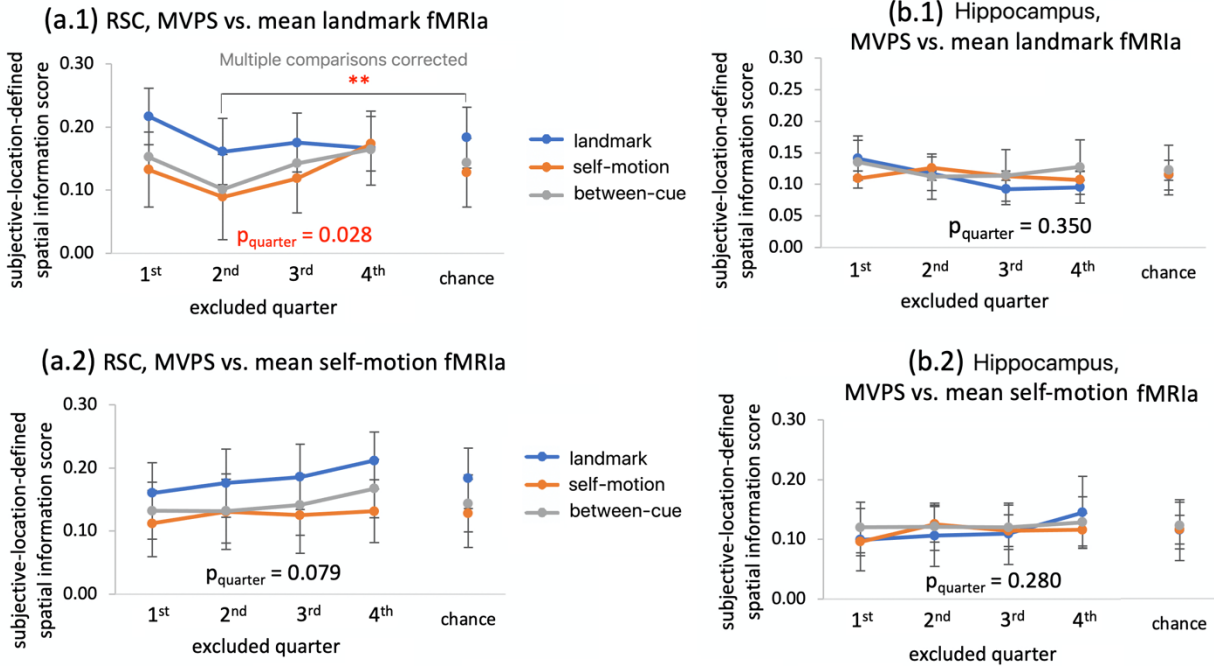

**Figure S7. Results of the fMRIa-based artificial lesion analysis, related to the discussion section in the main text.** We conducted these analyses with objective-location-based fMRIa and subjective-location-based MVPS. (a.1-a.2) Results of the fMRIa-based artificial lesion analysis for the retrosplenial cortex (RSC) when voxels were ranked from low to high by mean landmark fMRIa (a.1) and mean self-motion fMRIa (a.2). (b.1-b.2) Results of the fMRIa-based artificial lesion analysis for the hippocampus when voxels were ranked by mean landmark fMRIa (b.1) and mean self-motion fMRIa (b.2). In (a.2) (b.1) and (b.2), the main effect of excluded quarter was not significant ( $p_s < 0.05$ ). The main effect of excluded quarter was significant in (a.1) when the voxels were ranked by mean fMRIa for landmarks ( $F(3,57) = 4.119$ ,  $p_{\text{quarter}} = 0.028$ ,  $\eta_p^2 = 0.178$ ): excluding voxels relatively lower in mean landmark fMRIa (i.e., the 2<sup>nd</sup> quarter) tended to result in lower spatial information scores than excluding other quarters of voxels. Excluding the 2<sup>nd</sup> quarter of voxels also resulted in significant lower spatial information scores than the empirical chance levels. Details of these analyses can be found in STAR Methods. \* denotes  $p_{2\text{-tailed}} < 0.05$ .

|             |                     | <b>fMRIa</b>                            |                |                           |                |
|-------------|---------------------|-----------------------------------------|----------------|---------------------------|----------------|
| Cue         | Environment         | Objective-location-based                |                | Subjective-location-based |                |
|             |                     | Mean                                    | Std. Deviation | Mean                      | Std. Deviation |
| landmark    | nature              | 0.108                                   | 0.257          | 0.086                     | 0.232          |
|             | city                | 0.089                                   | 0.160          | 0.061                     | 0.175          |
| self-motion | nature              | 0.166                                   | 0.205          | 0.092                     | 0.235          |
|             | city                | 0.006                                   | 0.267          | 0.021                     | 0.261          |
|             |                     | <b>MVPS (spatial information score)</b> |                |                           |                |
| Cue         | Environment         | Objective-location-based                |                | Subjective-location-based |                |
|             |                     | Mean                                    | Std. Deviation | Mean                      | Std. Deviation |
| landmark    | within-nature       | 0.118                                   | 0.278          | 0.016                     | 0.023          |
|             | within-city         | 0.128                                   | 0.255          | 0.018                     | 0.032          |
|             | between environment | 0.146 **                                | 0.226          | 0.012 **                  | 0.018          |
| self-motion | within-nature       | 0.049                                   | 0.236          | 0.005                     | 0.031          |
|             | within-city         | 0.010                                   | 0.227          | 0.004                     | 0.026          |
|             | between environment | 0.095 *                                 | 0.192          | 0.011 ***                 | 0.012          |
| between cue | within-nature       | 0.125                                   | 0.220          | 0.007                     | 0.019          |
|             | within-city         | -0.006                                  | 0.283          | 0.004                     | 0.020          |
|             | between environment | 0.033 <sup>n.s.</sup>                   | 0.152          | 0.006 **                  | 0.008          |

**Table S1. Influences of environment on univariate fMRIa and MVPS in retrosplenial cortex, related to Figure 3a and Figure 5b.** (a) fMRIa is summarized as a function of location type (objective vs. subjective), cue type (landmark vs. self-motion), and environment (nature vs. city). fMRIa did not differ between the two environments ( $p_s > 0.2$ ). (b) Spatial information score in MVPS is summarized as a function of location type (objective vs. subjective), cue type (landmark vs. self-motion vs. between-cue), and environment type (nature vs. city vs. between-city). Similar to the factor day (Figure 5b), environment did not significantly modulate spatial information score ( $p_s > 0.05$ ): the within-nature scores did not differ from the within-city scores, and the within-environment scores (mean of the within-nature and within-motion scores) did not differ from the between-environment scores. Furthermore, also similar to the factor day (Figure 5b), the between-environment spatial information score was significant for all three measurements (landmark, self-motion, and between-cue) based on subjective location, indicating that the spatial coding was generalized between different environments. n.s.,  $p > 0.1$ ; \*  $p < 0.05$ ; \*\*  $p < 0.01$ ; \*\*\*  $p < 0.001$ .

| AAL region                                    | Left hemisphere |     |     | Right hemisphere |     |    | T value | p <sub>FWE-corr</sub> | Cluster size |
|-----------------------------------------------|-----------------|-----|-----|------------------|-----|----|---------|-----------------------|--------------|
|                                               | x               | y   | z   | x                | y   | z  |         |                       |              |
| <b>landmark, objective-location-based</b>     |                 |     |     |                  |     |    |         |                       |              |
| Angular                                       |                 |     |     | 43               | -68 | 31 | 7.76    | 0.004                 | 810          |
| Temporal_Mid                                  |                 |     |     | 42               | -61 | 22 | 7.36    | 0.007                 |              |
| Temporal_Mid                                  | -60             | -46 | -3  |                  |     |    | 6.88    | 0.013                 | 48           |
| Precuneus                                     |                 |     |     | 3                | -65 | 31 | 6.54    | 0.024                 | 21           |
| Occipital_Mid                                 | -34             | -75 | 35  |                  |     |    | 7.14    | 0.009                 | 179          |
|                                               |                 |     |     | 34               | -74 | 38 | 6.42    | 0.028                 | 21           |
| <b>landmark, subjective-location-based</b>    |                 |     |     |                  |     |    |         |                       |              |
| Temporal_Mid                                  |                 |     |     | 58               | -63 | 7  | 9.34    | <0.001                | 718          |
| Temporal_Mid                                  | -62             | -47 | -2  |                  |     |    | 8.94    | 0.001                 | 1238         |
|                                               | -57             | -53 | 3   |                  |     |    | 7.56    | 0.003                 |              |
| Temporal_Mid                                  |                 |     |     | 45               | -52 | 16 | 8.51    | 0.001                 | 370          |
|                                               |                 |     |     | 50               | -57 | 20 | 6.36    | 0.027                 |              |
| Temporal_Mid                                  | -50             | -64 | 21  |                  |     |    | 8.47    | 0.001                 | 1236         |
|                                               | -54             | -34 | -8  |                  |     |    | 7.10    | 0.007                 | 68           |
|                                               |                 |     |     | 47               | -63 | 1  | 6.67    | 0.015                 | 79           |
|                                               | -60             | -28 | -7  |                  |     |    | 6.47    | 0.021                 | 25           |
|                                               | -47             | -63 | 0   |                  |     |    | 6.26    | 0.037                 | 11           |
|                                               |                 |     |     | 57               | -51 | 15 | 6.09    | 0.043                 | 6            |
| Occipital_Mid                                 |                 |     |     | 45               | -67 | 29 | 8.01    | 0.001                 | 571          |
|                                               |                 |     |     | 35               | -75 | 40 | 6.45    | 0.022                 | 22           |
|                                               | -34             | -76 | 40  |                  |     |    | 6.27    | 0.031                 | 36           |
|                                               |                 |     |     | 39               | -67 | 7  | 6.09    | 0.044                 | 2            |
| Precuneus                                     |                 |     |     | 3                | -67 | 34 | 7.63    | 0.003                 | 254          |
|                                               |                 |     |     | 7                | -46 | 17 | 7.63    | 0.003                 | 179          |
| Temporal_Inf                                  | -54             | -57 | -8  |                  |     |    | 6.17    | 0.038                 | 11           |
| <b>self-motion, objective-location-based</b>  |                 |     |     |                  |     |    |         |                       |              |
| Hippocampus                                   | -21             | -11 | -22 |                  |     |    | 8.26    | 0.001                 | 19           |
| Occipital_Sup                                 | -27             | -84 | 39  |                  |     |    | 6.31    | 0.039                 | 3            |
| <b>self-motion, subjective-location-based</b> |                 |     |     |                  |     |    |         |                       |              |
| Occipital_Mid                                 | -28             | -79 | 17  |                  |     |    | 8.31    | 0.003                 | 395          |
| undefined                                     | -18             | -79 | 16  |                  |     |    | 6.51    | 0.029                 |              |
| Occipital_Sup                                 | -25             | -85 | 39  |                  |     |    | 8.05    | 0.005                 | 186          |
| undefined                                     |                 |     |     | 33               | -62 | 7  | 6.8     | 0.020                 | 12           |
| Temporal_Mid                                  | -49             | -50 | 10  |                  |     |    | 6.68    | 0.023                 | 30           |
|                                               | -57             | -44 | 0   |                  |     |    | 6.29    | 0.043                 | 5            |
| Occipital_Mid                                 | -34             | -86 | 24  |                  |     |    | 6.39    | 0.036                 | 12           |
|                                               | -32             | -69 | 34  |                  |     |    | 6.22    | 0.047                 | 2            |
| Cuneus                                        |                 |     |     | 12               | -78 | 19 | 6.24    | 0.045                 | 1            |
| <b>between-cue, objective-location-based</b>  |                 |     |     |                  |     |    |         |                       |              |
| undefined                                     | -45             | -15 | -11 |                  |     |    | 8.93    | 0.001                 | 78           |
| Occipital_Mid                                 |                 |     |     | 33               | -83 | 20 | 7.34    | 0.006                 | 49           |
| <b>between-cue, subjective-location-based</b> |                 |     |     |                  |     |    |         |                       |              |
| Occipital_Mid                                 |                 |     |     | 32               | -83 | 20 | 10.55   | <0.001                | 509          |
|                                               |                 |     |     | 36               | -76 | 25 | 6.02    | 0.041                 |              |
| Occipital_Mid                                 | -31             | -69 | 31  |                  |     |    | 9.69    | <0.001                | 2720         |
|                                               | -45             | -74 | 13  |                  |     |    | 8.38    | 0.001                 |              |
| Angular                                       | -52             | -67 | 25  |                  |     |    | 7.40    | 0.007                 |              |
| undefined                                     | -44             | -15 | -11 |                  |     |    | 9.04    | 0.001                 | 343          |
| Occipital_Mid                                 | -61             | -46 | -7  |                  |     |    | 8.36    | 0.002                 | 3468         |
| Temporal_Inf                                  | -54             | -56 | -8  |                  |     |    | 7.59    | 0.005                 |              |
| Temporal_Mid                                  | -50             | -49 | 10  |                  |     |    | 7.56    | 0.006                 |              |
| Occipital_Sup                                 | -20             | -64 | 28  |                  |     |    | 8.11    | 0.003                 | 134          |
| undefined                                     |                 |     |     | 43               | -14 | -9 | 7.10    | 0.010                 | 77           |
| Occipital_Mid                                 |                 |     |     | 51               | -70 | 30 | 6.99    | 0.011                 | 269          |
|                                               |                 |     |     | 43               | -73 | 30 | 6.88    | 0.013                 |              |
|                                               |                 |     |     | 27               | -75 | 28 | 6.84    | 0.014                 | 45           |
|                                               |                 |     |     | 34               | -76 | 40 | 6.34    | 0.027                 | 86           |
| ParaHippocampal                               |                 |     |     | 35               | -39 | -5 | 6.55    | 0.020                 | 10           |
| Angular                                       |                 |     |     | 44               | -53 | 24 | 6.55    | 0.020                 | 34           |
| Temporal_Mid                                  |                 |     |     | 61               | -42 | -5 | 6.39    | 0.025                 | 59           |

**Table S2. The searchlight analysis of MVPS, corresponding to Figure S2 and related to Figure 5.** Listed are region (AAL atlas), MNI coordinates (x, y, z), t-value, corrected p-value of the peak voxel (p<sub>FWE-corrected</sub>, 1-tailed, voxel-inference, nonparametric permutation test, Nichols & Holmes, 2002), and cluster size at p<sub>FWE-corrected</sub> = 0.05. Mid: middle; Inf: inferior; Sup: superior.



| fMRIa results |                    |        |                     |        |                           |                         |                    |        |                     |        |                           |                         |                   |    |
|---------------|--------------------|--------|---------------------|--------|---------------------------|-------------------------|--------------------|--------|---------------------|--------|---------------------------|-------------------------|-------------------|----|
| Region        | Landmark           |        |                     |        | fMRIa pattern specificity | Resemble physical space | Self-motion        |        |                     |        | fMRIa pattern specificity | Resemble physical space | Resemble behavior |    |
|               | Objective-location |        | Subjective-location |        |                           |                         | Objective-location |        | Subjective-location |        |                           |                         |                   |    |
|               | based              | unique | based               | unique |                           |                         | based              | unique | based               | unique |                           |                         |                   |    |
| right aIEC    | no                 | N/A    | no                  | N/A    | no                        | no                      | no                 | N/A    | no                  | N/A    | no                        | no                      | no                | no |
| right pmEC    | no                 | N/A    | no                  | N/A    | no                        | no                      | no                 | N/A    | no                  | N/A    | no                        | yes                     | no                | no |
| left aIEC     | no                 | N/A    | no                  | N/A    | no                        | no                      | no                 | N/A    | no                  | N/A    | no                        | no                      | no                | no |
| left pmEC     | no                 | N/A    | no                  | N/A    | no                        | no                      | no                 | N/A    | no                  | N/A    | no                        | yes                     | no                | no |
| PHC           | no                 | N/A    | no                  | N/A    | no                        | no                      | yes                | no     | no                  | N/A    | no                        | no                      | no                | no |
| PRC           | no                 | N/A    | no                  | N/A    | no                        | no                      | no                 | N/A    | no                  | N/A    | no                        | no                      | no                | no |

  

| MVPS results |                    |        |                     |        |                         |                    |        |                     |        |                         |                   |                    |        |                     |        |
|--------------|--------------------|--------|---------------------|--------|-------------------------|--------------------|--------|---------------------|--------|-------------------------|-------------------|--------------------|--------|---------------------|--------|
| Region       | landmark           |        |                     |        | Resemble physical space | Self-motion        |        |                     |        | Resemble physical space | Resemble behavior | Between-cue        |        |                     |        |
|              | Objective-location |        | Subjective-location |        |                         | Objective-location |        | Subjective-location |        |                         |                   | Objective-location |        | Subjective-location |        |
|              | based              | unique | based               | unique |                         | based              | unique | based               | unique |                         |                   | based              | unique | based               | unique |
| right aIEC   | no                 | N/A    | no                  | N/A    | no                      | no                 | N/A    | no                  | N/A    | no                      | no                | no                 | N/A    | yes                 | no     |
| right pmEC   | no                 | N/A    | no                  | N/A    | no                      | no                 | N/A    | no                  | N/A    | no                      | no                | no                 | N/A    | no                  | N/A    |
| left aIEC    | no                 | N/A    | no                  | N/A    | no                      | no                 | N/A    | no                  | N/A    | no                      | no                | no                 | N/A    | no                  | N/A    |
| left pmEC    | no                 | N/A    | no                  | N/A    | yes                     | no                 | N/A    | no                  | N/A    | no                      | no                | no                 | N/A    | no                  | N/A    |
| PHC          | yes                | no     | yes                 | no     | no                      | no                 | N/A    | no                  | N/A    | no                      | yes               | no                 | N/A    | no                  | N/A    |
| PRC          | no                 | N/A    | no                  | N/A    | no                      | no                 | N/A    | yes                 | no     | no                      | no                | no                 | N/A    | no                  | N/A    |

**Table S3. fMRIa and MVPS results of other regions in the medial temporal lobe, related to Figure 3&4&5&6.** These areas were analyzed using the same methods as the retrosplenial cortex and hippocampus. Note that we did not attempt to disentangle the unique contributions of objective location and subjective location if the overall fMRIa or MVPS effects were not significant (i.e., N/A). ‘no’ denotes non-significant effect; ‘yes’ denotes significant effect at  $p < 0.05$  (highlighted in red); ‘N/A’ denotes not applicable. aIEC: anterior-lateral entorhinal cortex; pmEC: posterior-medial entorhinal cortex; PHC: parahippocampal cortex; PRC: perirhinal cortex.

| Region      | MRI_day1 |                | MRI_day2 |                |
|-------------|----------|----------------|----------|----------------|
|             | mean     | Std. Deviation | mean     | Std. Deviation |
| RSC         | 15.625   | 1.326          | 16.837   | 1.847          |
| Hippocampus | 16.050   | 1.268          | 17.118   | 1.879          |
| PHC         | 16.071   | 1.039          | 17.079   | 1.448          |
| PRC         | 16.349   | 1.439          | 17.588   | 1.695          |
| right aIEC  | 13.443   | 1.173          | 14.204   | 1.726          |
| right pmEC  | 13.854   | 0.840          | 14.686   | 1.629          |
| left aIEC   | 14.016   | 1.146          | 15.200   | 1.995          |
| left pmEC   | 14.008   | 1.003          | 15.142   | 1.335          |

**Table S4. Temporal signal-to-noise ratio (tSNR), related to the discussion section in the main text.** tSNR was calculated for each voxel, which was then averaged across all voxels in the brain region. We submitted tSNR to a repeated-measures ANOVA test, with brain region (= 5; the four EC subregions were grouped together), day, and run as independent variables. The main effect of brain region was significant ( $F(4,76) = 65.432$ ,  $p < 0.001$ ,  $\eta_p^2 = 0.775$ ), meaning that the regions differed in tSNR. Post-hoc comparisons with Bonferroni-Holm correction showed that PRC had higher tSNR than RSC, hippocampus, and PHC ( $p_{\text{corrected}} < 0.001$ ), which in turn had higher tSNR than EC ( $p_{\text{corrected}} < 0.001$ ). The main effect of day was significant ( $F(1,19) = 16.422$ ,  $p < 0.001$ ,  $\eta_p^2 = 0.464$ ), and there were no significant interaction effects involving day, meaning that for all regions, tSNR significantly improved on the 2<sup>nd</sup> than the 1<sup>st</sup> scanning day. The interaction between region and run was significant ( $F(28,532) = 2.634$ ,  $p < 0.001$ ). Following-up analyses showed that for RSC and PHC, the main effect of run was significant ( $p_s < 0.02$ ), meaning that tSNR decreased linearly across runs (the linear trend of run was significant, RSC,  $t = 4.905$ ,  $p < 0.001$ ; PHC,  $t = 4.383$ ,  $p < 0.001$ ), whereas the main effect of run was non-significant for other regions ( $p_s > 0.07$ ).

We also looked more closely at EC by dividing it to four subregions, which were submitted to a repeated-measure ANOVA test, with hemisphere (left vs. right) and entorhinal subregion (aIEC vs. pmEC) as independent variables. The main effect of hemisphere was significant ( $F(1,19) = 39.179$ ,  $p < 0.001$ ,  $\eta_p^2 = 0.673$ ), meaning that the left EC had higher tSNR than the right EC. The main effect of subregion was not significant ( $F(1,19) = 1.503$ ,  $p = 0.235$ ,  $\eta_p^2 = 0.073$ ). The interaction between hemisphere and subregion was significant ( $F(1,19) = 4.560$ ,  $p = 0.046$ ,  $\eta_p^2 = 0.194$ ), in that aIEC showed greater hemispheric specificity than pmEC.

aIEC: anterior-lateral entorhinal cortex; pmEC: posterior-medial entorhinal cortex; PHC: parahippocampal cortex; PRC: perirhinal cortex.

| Day session  |      | landmark |                | self-motion |                |
|--------------|------|----------|----------------|-------------|----------------|
|              |      | Mean     | Std. Deviation | Mean        | Std. Deviation |
| Pre-scan_day | run1 | 0.766    | 0.137          | 0.644       | 0.169          |
|              | run2 | 0.797    | 0.113          | 0.713       | 0.174          |
|              | run3 | 0.781    | 0.134          | 0.709       | 0.169          |
|              | run4 | 0.829    | 0.116          | 0.734       | 0.146          |
| MRI_day1     | run1 | 0.843    | 0.134          | 0.770       | 0.126          |
|              | run2 | 0.848    | 0.129          | 0.777       | 0.094          |
|              | run3 | 0.840    | 0.143          | 0.792       | 0.123          |
|              | run4 | 0.838    | 0.137          | 0.787       | 0.113          |
| MRI_day2     | run1 | 0.853    | 0.121          | 0.802       | 0.125          |
|              | run2 | 0.848    | 0.123          | 0.762       | 0.153          |
|              | run3 | 0.875    | 0.116          | 0.802       | 0.150          |
|              | run4 | 0.867    | 0.123          | 0.792       | 0.141          |

**Table S5. Behavioral performance over the entire course of experiment, related to Figure 2 and the discussion section of the main text.** First, to evaluate the influences of day, we submitted accuracy data to a repeated-measures ANOVA, with day (Pre-scan vs. MRI\_day1 vs. MRI\_day2) and cue type (landmark vs. self-motion), and run (4 runs) as independent variables. The main effect of day was significant ( $F(2,38)=13.697$   $p < 0.001$ ,  $\eta_p^2 = 0.419$ ). Post-hoc tests showed that the two MRI scanning days did not differ from each other in accuracy ( $p_{\text{holm}} = 0.306$ ), whereas the two scanning days had significantly higher accuracy than the pre-scan day ( $p_{\text{holm}} = 0.001$ ), indicating that while participants' performance improved on the first scanning day compared to the pre-scan day, their performance stayed unchanged during the two scanning days. Main effect of cue type was significant ( $p < 0.001$ ). No other effects were significant ( $p_s > 0.1$ ). These results indicate that the performance improvement mainly occurred between the behavioral training day and the first scanning day.

Second, we looked into more details and tested whether behavioral performance changed over time within each day, by submitting behavioral accuracy into repeated-measures ANOVA tests, with cue type (landmark vs. self-motion) and run (4 runs) as independent variables. In the pre-scan day, the main effect of run was significant ( $F(3,57) = 3.520$ ,  $p = 0.037$ ,  $\eta_p^2 = 0.156$ ), and the linear trend of run was significant ( $t = 2.911$ ,  $p = 0.005$ ), meaning that behavioral accuracy gradually increased over time. By contrast, the main effect of run was not significant in either the first MRI scanning day ( $F(3,57) = 0.101$ ,  $p = 0.959$ ,  $\eta_p^2 = 0.005$ ; linear trend,  $t = 0.386$ ,  $p = 0.701$ ) or the second MRI scanning day ( $F(3,57) = 1.561$ ,  $p = 0.209$ ,  $\eta_p^2 = 0.076$ ; linear trend,  $t = 0.802$ ,  $p = 0.426$ ), meaning that behavioral accuracy remained rather stable over time within the day. These results indicated that while there was learning during the first pre-scan training day, no learning occurred during each of the two MRI scanning days.

| Region      | Current study      |                  |                   | Chen et al., 2019  |                    |                  |
|-------------|--------------------|------------------|-------------------|--------------------|--------------------|------------------|
|             | F                  | p                | $\eta_p^2$        | F                  | p                  | $\eta_p^2$       |
| right EC    | <0.001<br>(0.195)  | 0.982<br>(0.664) | <0.001<br>(0.011) | 9.344<br>(9.01)    | 0.006<br>(0.007)   | 0.308<br>(0.311) |
| left EC     | 3.829<br>(1.461)   | 0.065<br>(0.243) | 0.168<br>(0.079)  | 6.250              | 0.021              | 0.229            |
| RSC         | 17.267<br>(15.512) | 0.001<br>(0.001) | 0.476<br>(0.463)  | 20.028<br>(20.196) | <0.001<br>(<0.001) | 0.488<br>(0.502) |
| Hippocampus | 1.375<br>(0.695)   | 0.255<br>(0.416) | 0.068<br>(0.037)  | 11.886             | 0.002              | 0.361            |
| PHC         | 6.282              | 0.021            | 0.248             | 12.309<br>(11.449) | 0.002<br>(0.003)   | 0.370<br>(0.364) |
| PRC         | 0.823              | 0.376            | 0.775             | 15.304             | < .001             | 0.422            |

**Table S6. ROI-based analyses of navigational success effect in the current study and our previous study (Chen et al., 2019), related to the discussion section in the main text.** In the current study, we constructed a GLM, in which the location occupation period of correct trials and incorrect trials were modeled with different regressors. Landmarks and self-motion cues were modeled with different regressors. Because some participants did not make any mistakes in the landmark condition in some runs, scans were concatenated across all the runs in SPM12. Other aspects of the GLM were the same as fMRIa-GLM2, but with no parametric regressors included. For each brain region, mean beta estimate of brain activation was submitted into a repeated measures ANOVA with cue type (landmark vs. self-motion) and correctness (correct vs. incorrect) as independent variables. The results showed that in the current study, only RSC and PHC exhibited significant effects of successful navigation, in that they were more strongly activated in correct trials than in incorrect trials. By contrast, the same analysis in our previous study showed that all the medial temporal lobe areas and RSC significantly contributed to successful navigation.

Significant results are highlighted in red. Since there were two more participants in our previous study than in the current study (20 vs. 22 participants), the effect size (i.e.,  $\eta_p^2$ ) is more comparable between the two studies. Results with ROI-specific statistical outliers excluded are in parentheses. RSC: retrosplenial cortex; EC: entorhinal cortex; PHC: parahippocampal cortex; PRC: perirhinal cortex.

## Supplemental references

- Cisler, J. M., Bush, K., & Steele, J. S. (2014). A comparison of statistical methods for detecting context-modulated functional connectivity in fMRI. *NeuroImage*, *84*, 1042–1052.
- Hebart, M. N., Görgen, K., & Haynes, J.-D. (2015). The Decoding Toolbox (TDT): A versatile software package for multivariate analyses of functional imaging data. *Frontiers in Neuroinformatics*, *8*, 88.
- Morgan, L. K., MacEvoy, S. P., Aguirre, G. K., & Epstein, R. A. (2011). Distances between real-world locations are represented in the human hippocampus. *Journal of Neuroscience*, *31*(4), 1238–1245.
- Nichols, T. E., & Holmes, A. P. (2002). Nonparametric permutation tests for functional neuroimaging: A primer with examples. *Human Brain Mapping*, *15*(1), 1–25.
